# Supplementary material for: High site-fidelity in common bottlenose dolphins despite low salinity exposure and associated indicators of compromised health
Source: PLOS journal article supplement (doi:10.1371/journal.pone.0258031), 2021-09-30

Provided as supplemental material for Takeshita et al (in submission)

Authors: Todd Speakman, Ryan Takeshita, Brian C. Balmer, Francesca Messina, Eric S. Zolman, Len Thomas, Randall S. Wells, Cynthia R. Smith, Teresa K. Rowles, and Lori H. Schwacke

Description: These plots combine information about each dolphin's 1) history of photographic identification survey observations (points colored by year of observation), 2) locations received during deployment of satellite telemetry tags (black points), and 3) the potential ranging area (PRA) determined by the satellite transmissions (black contour). The dolphin ID is provided at the top of each plot along with the general pattern of usage (either Island or Interior).

# Y00: Interior

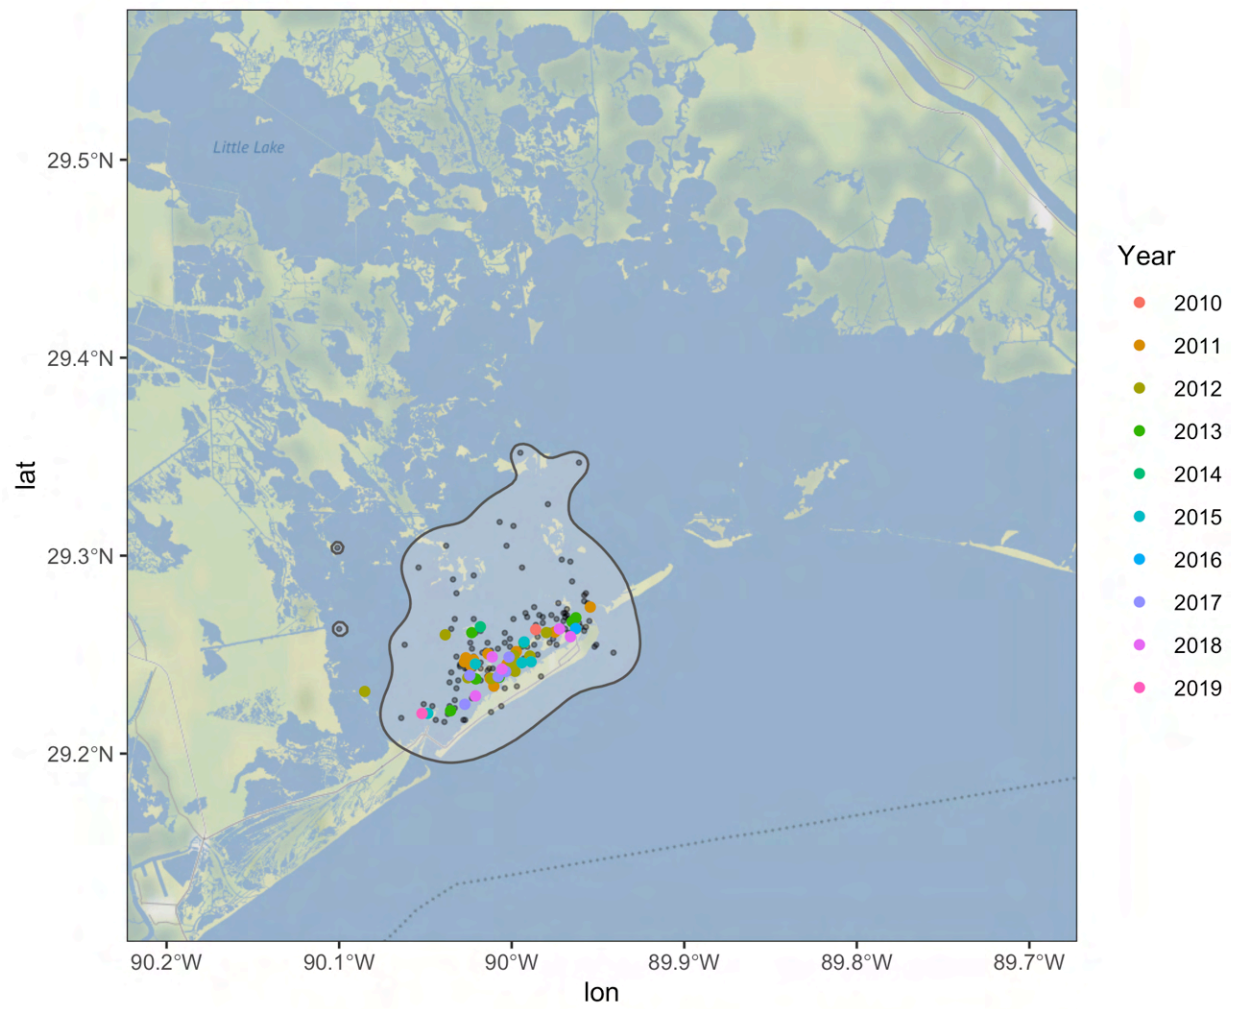

# Y01: Interior

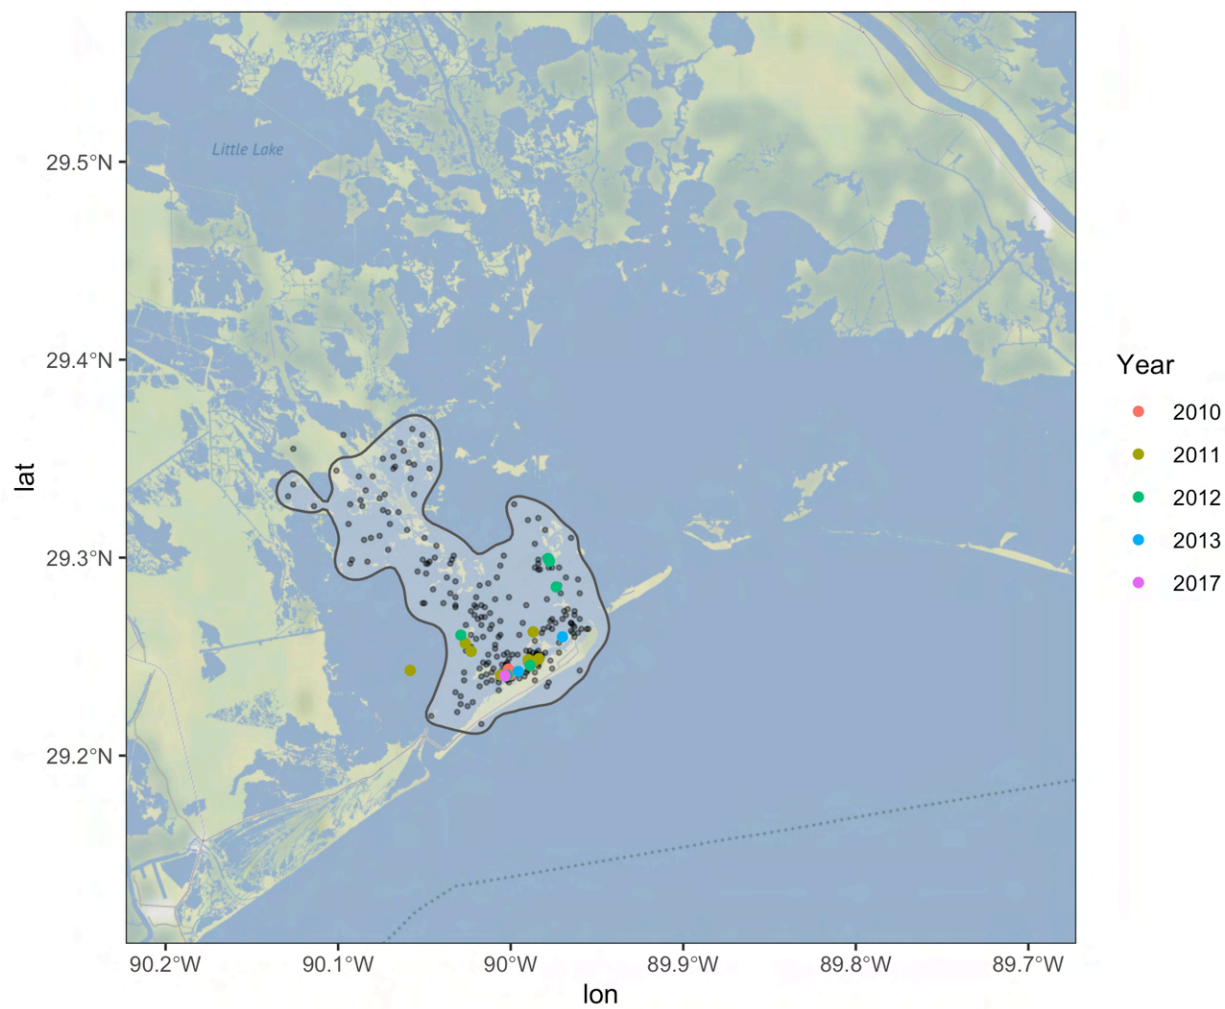

# Y02: Interior

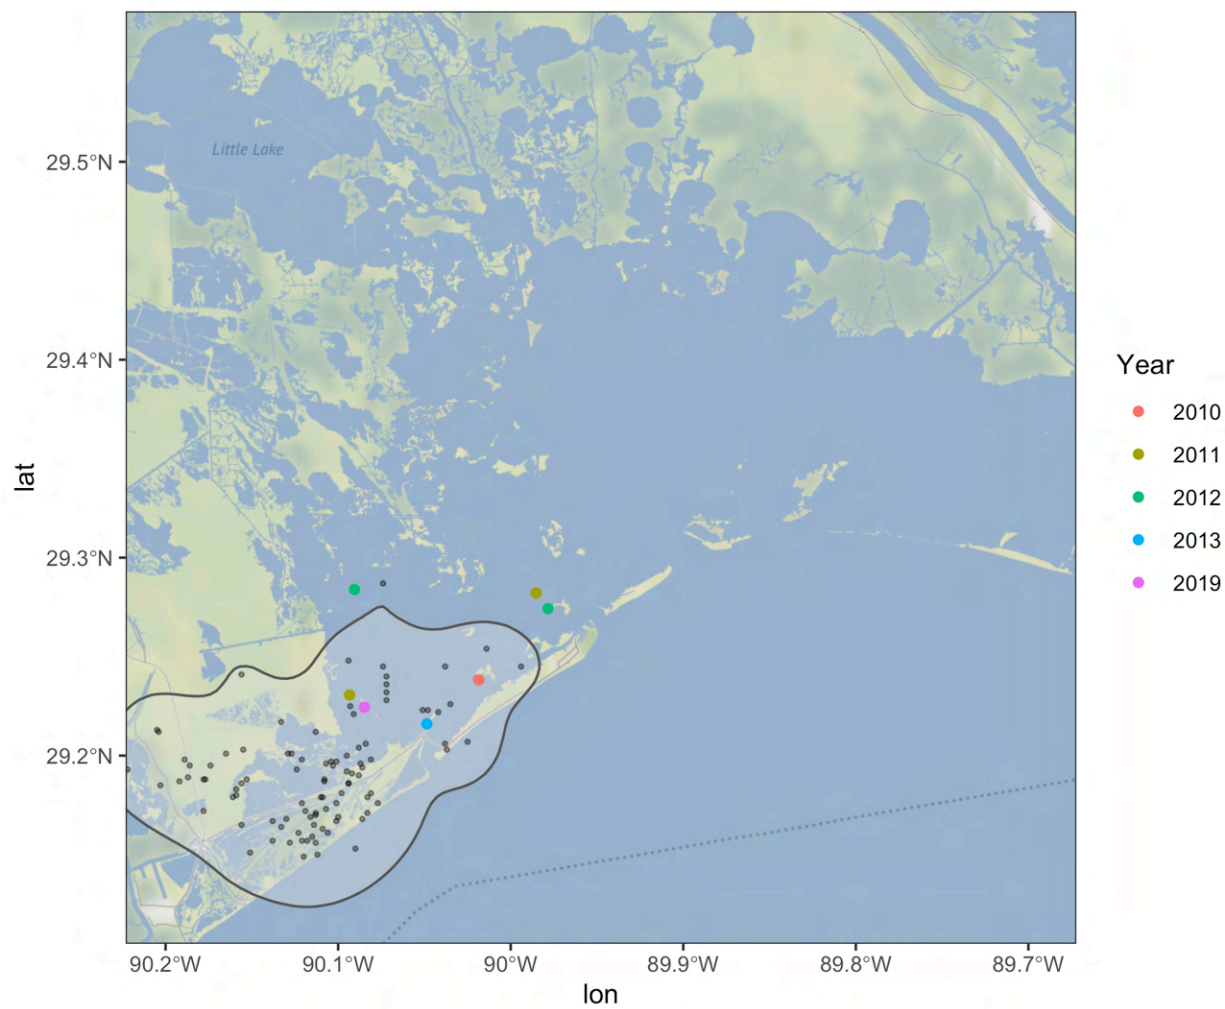



### Y03: Island

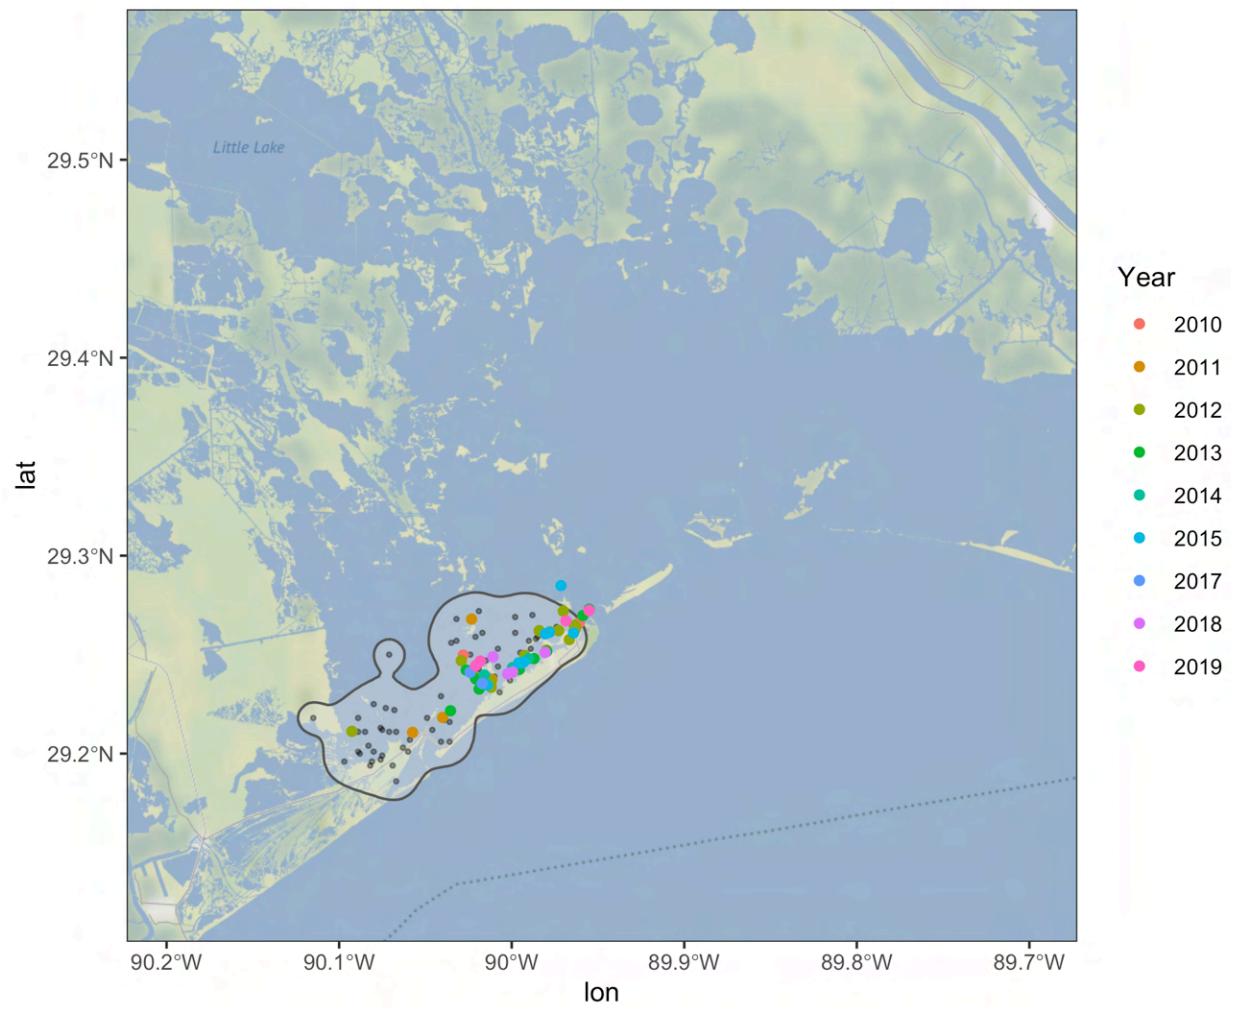

# Y04: Interior

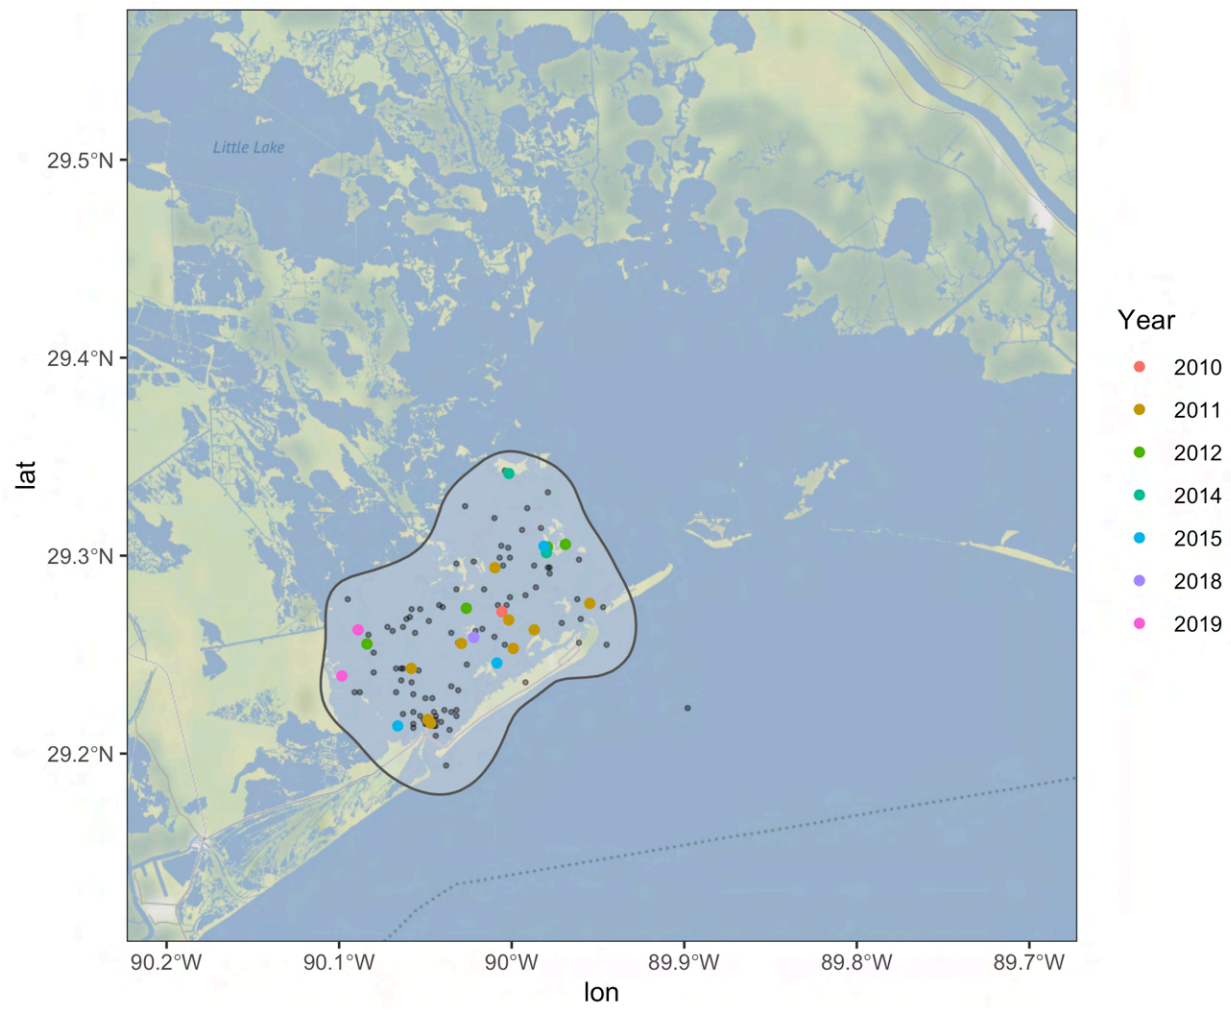

# Y07: Interior

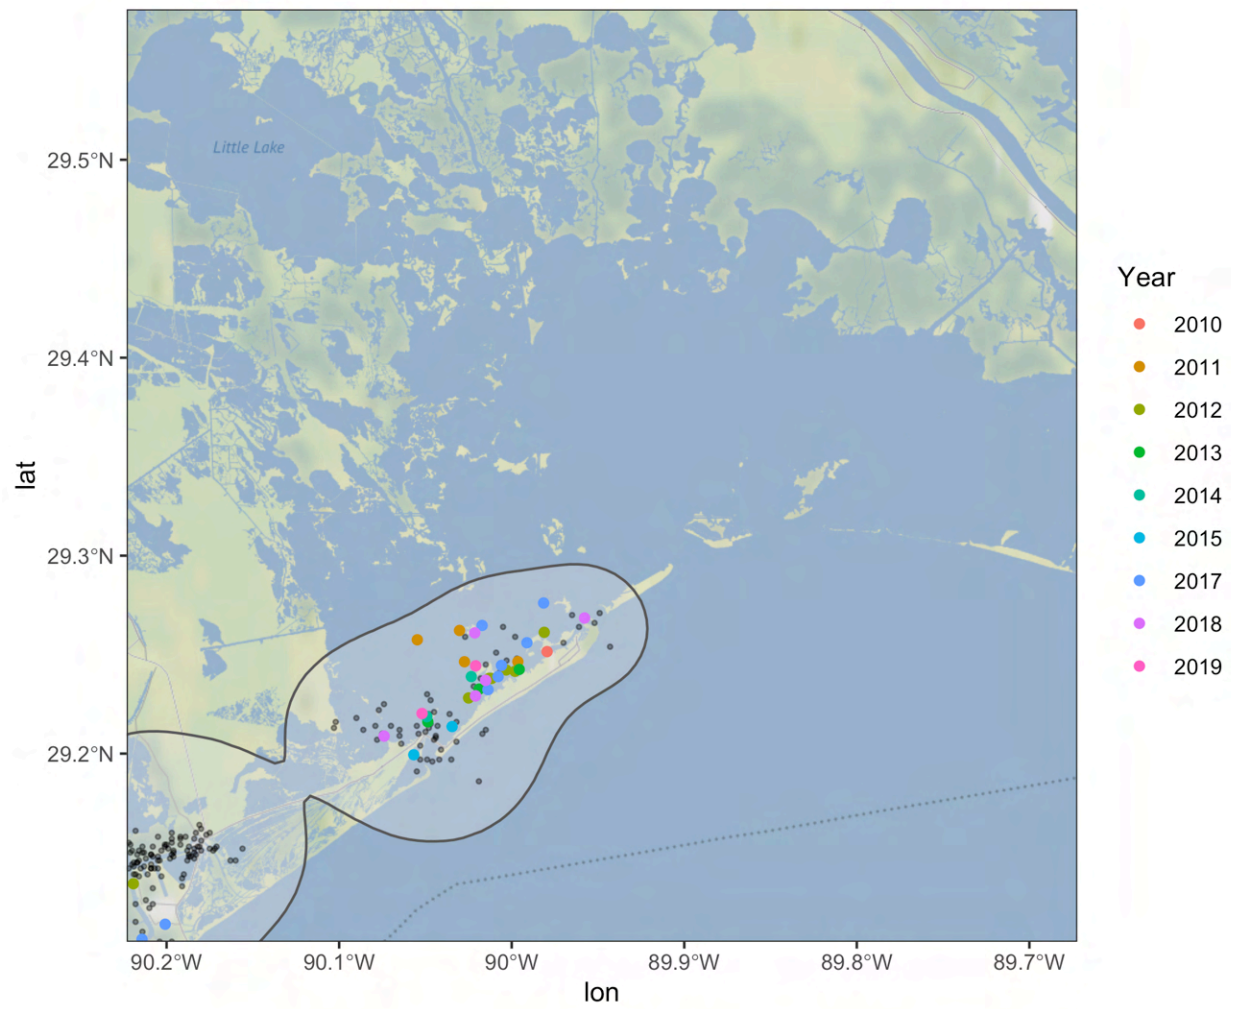

# Y08: Island

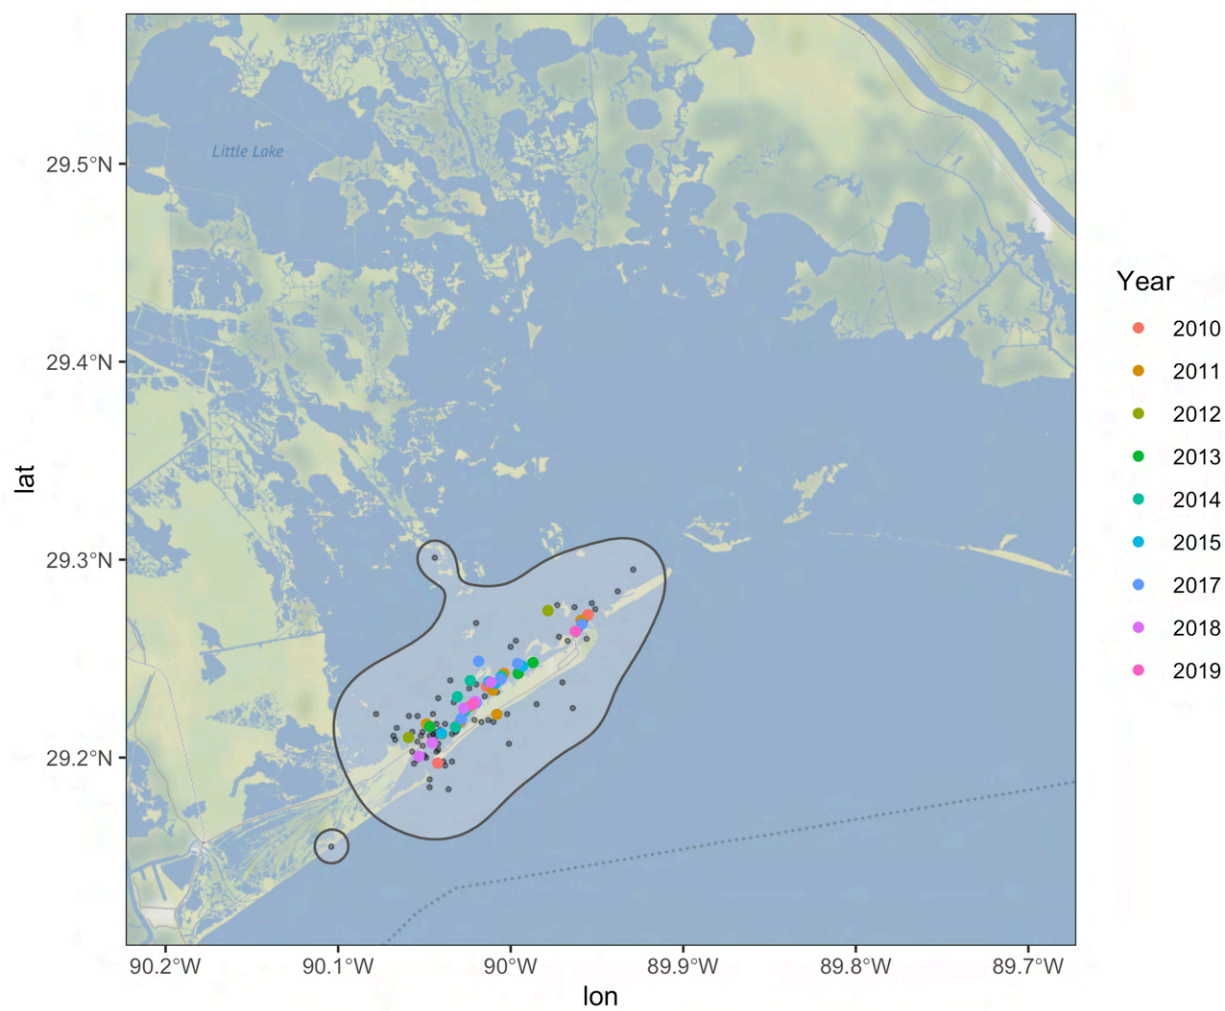

# Y09: Island

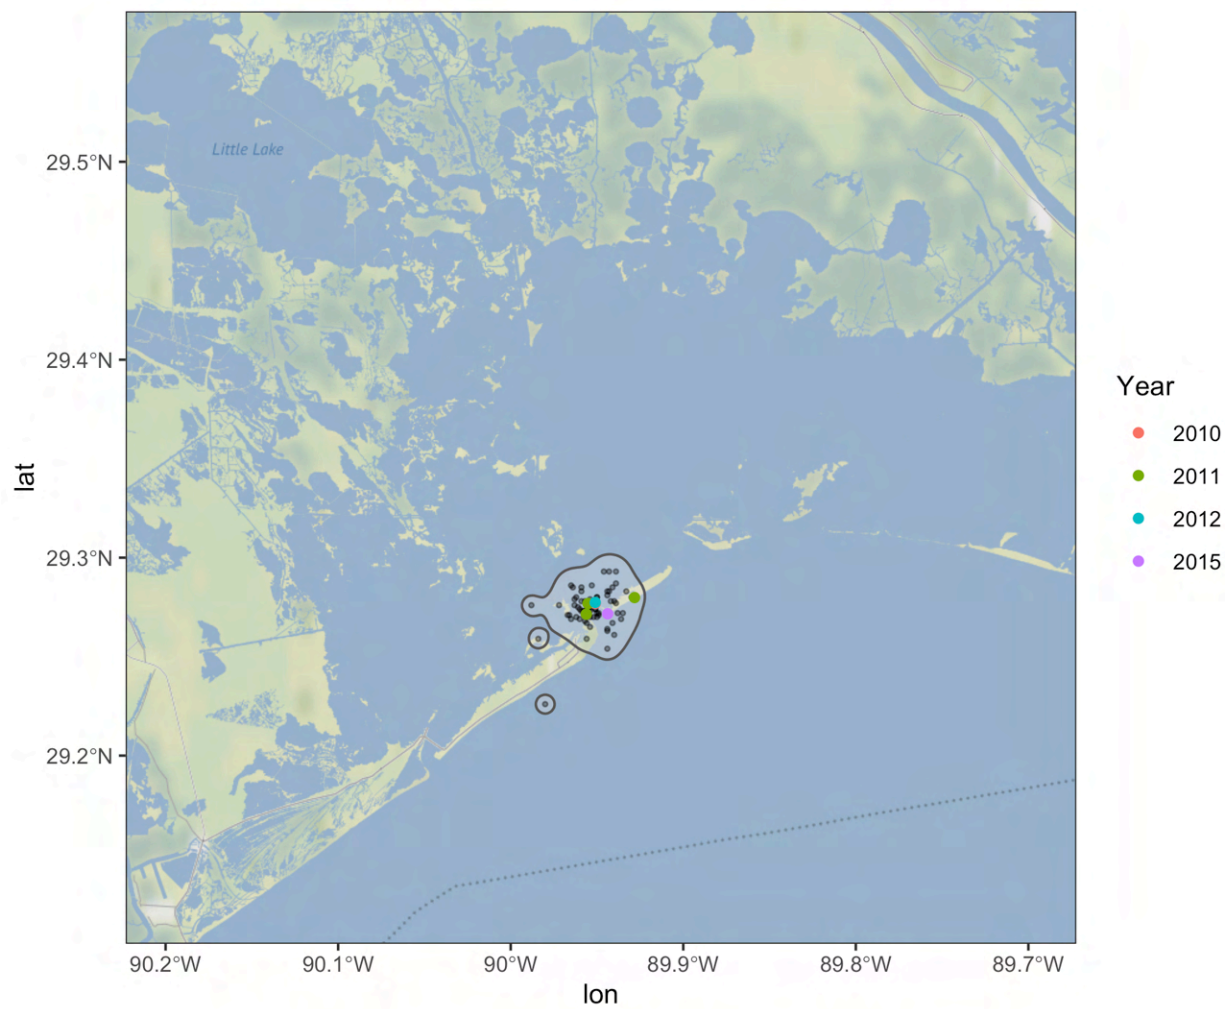



# Y10: Interior

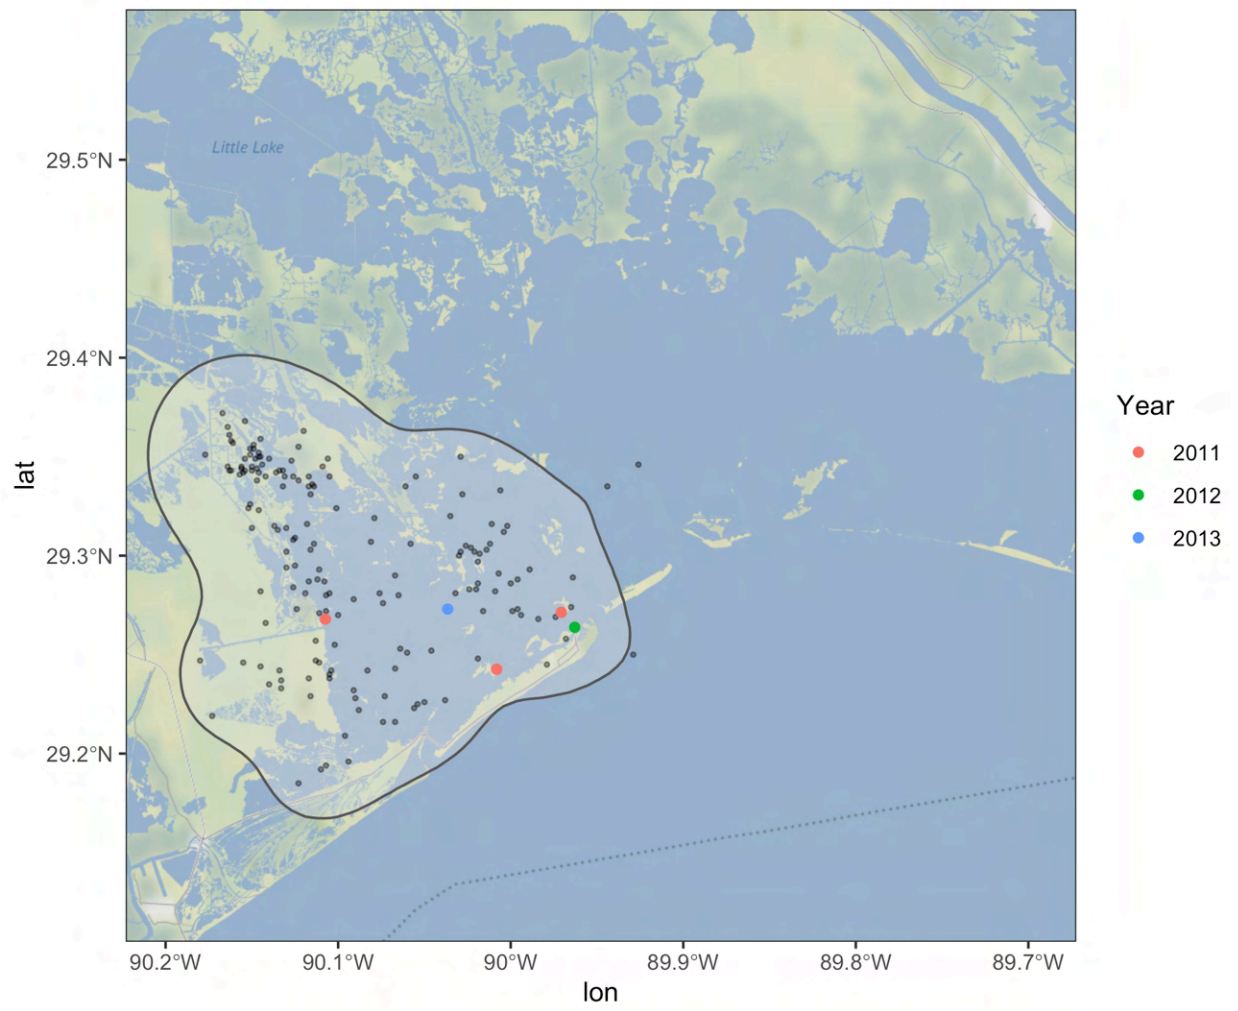



# Y11: Island

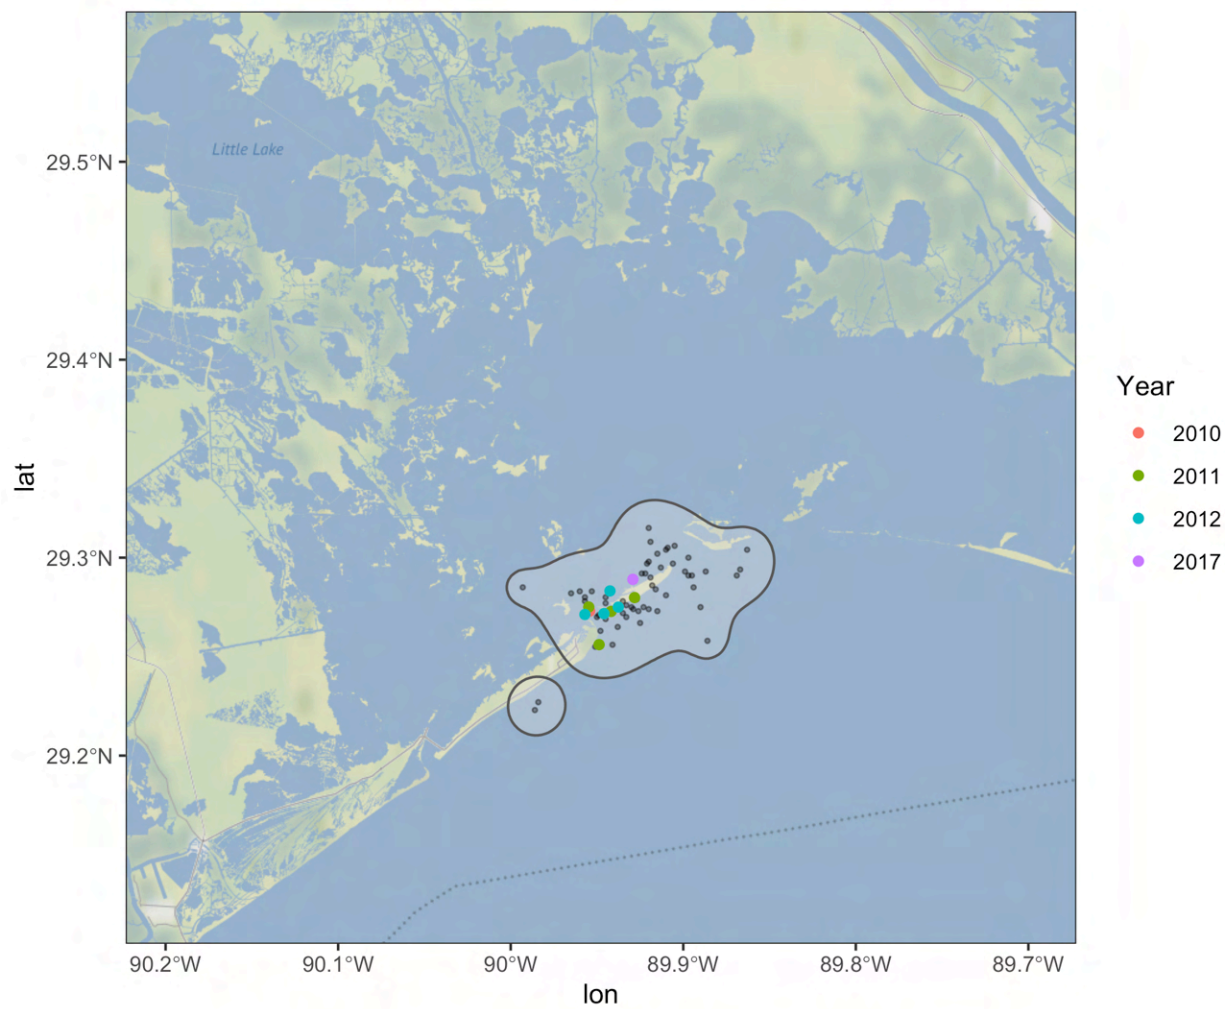

# Y12: Interior

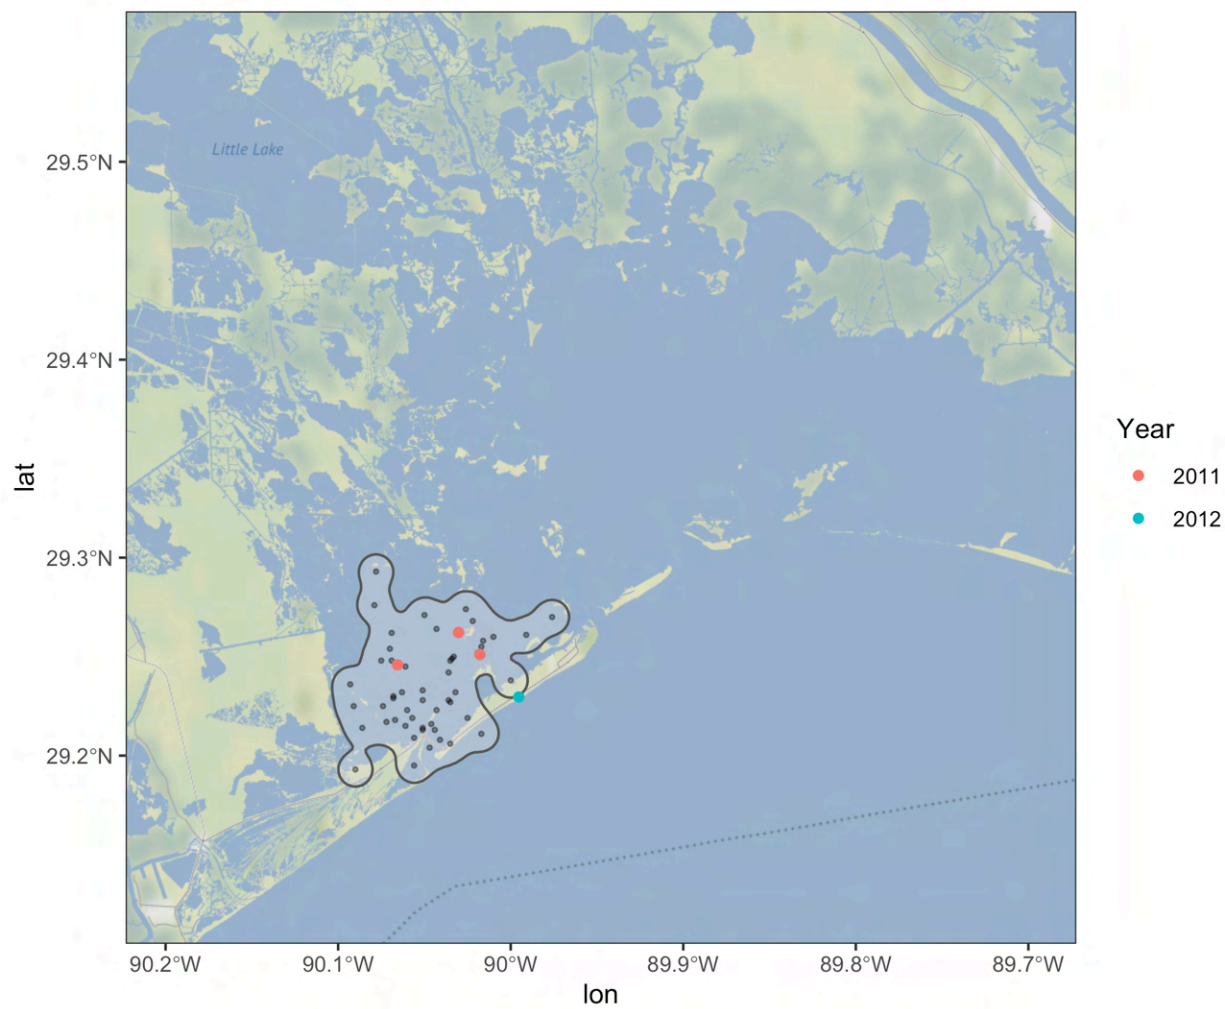

### Y13: Interior

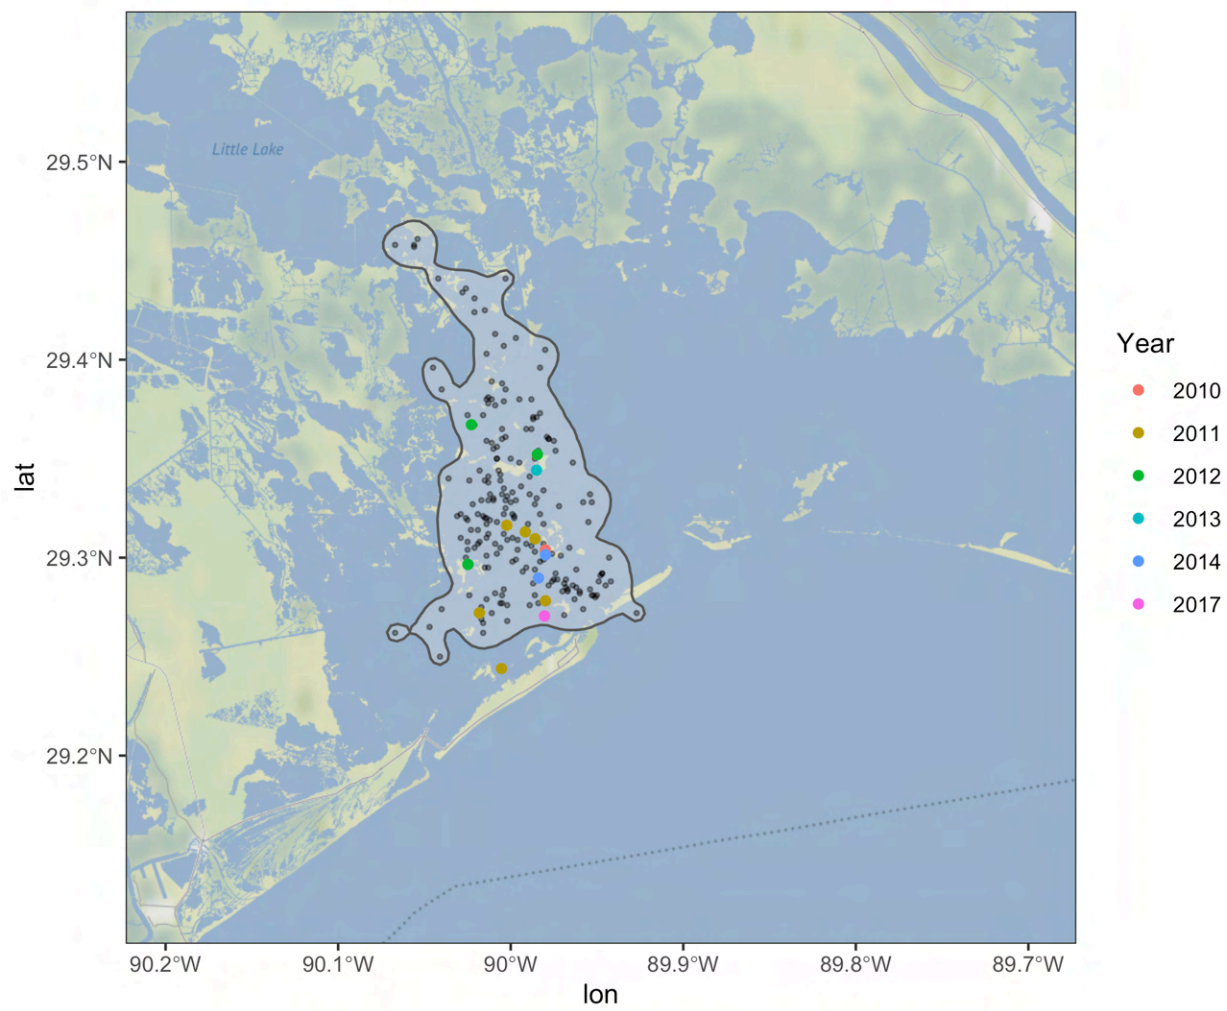

# Y14: Interior

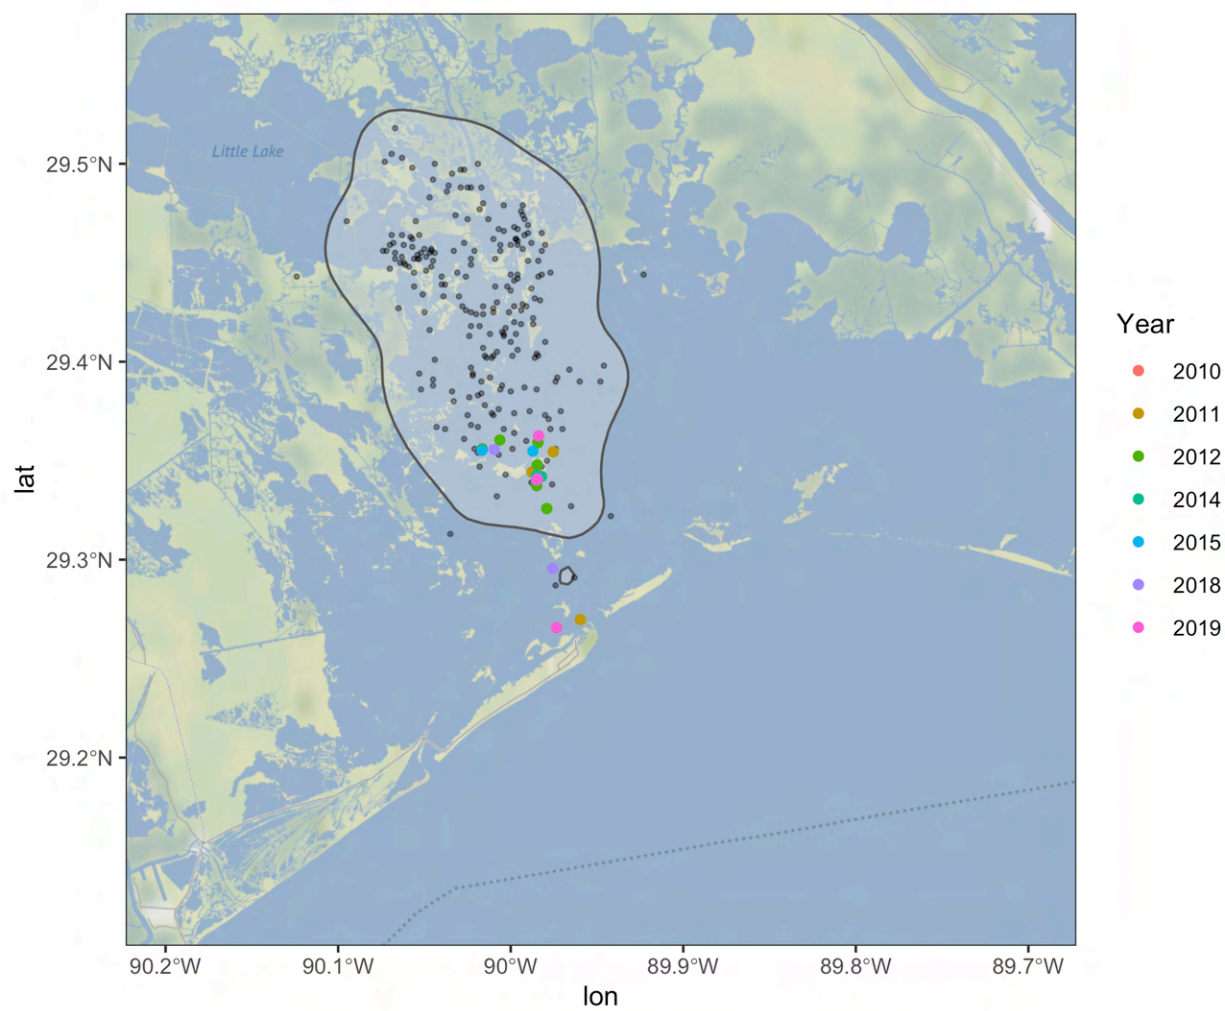

# Y15: Interior

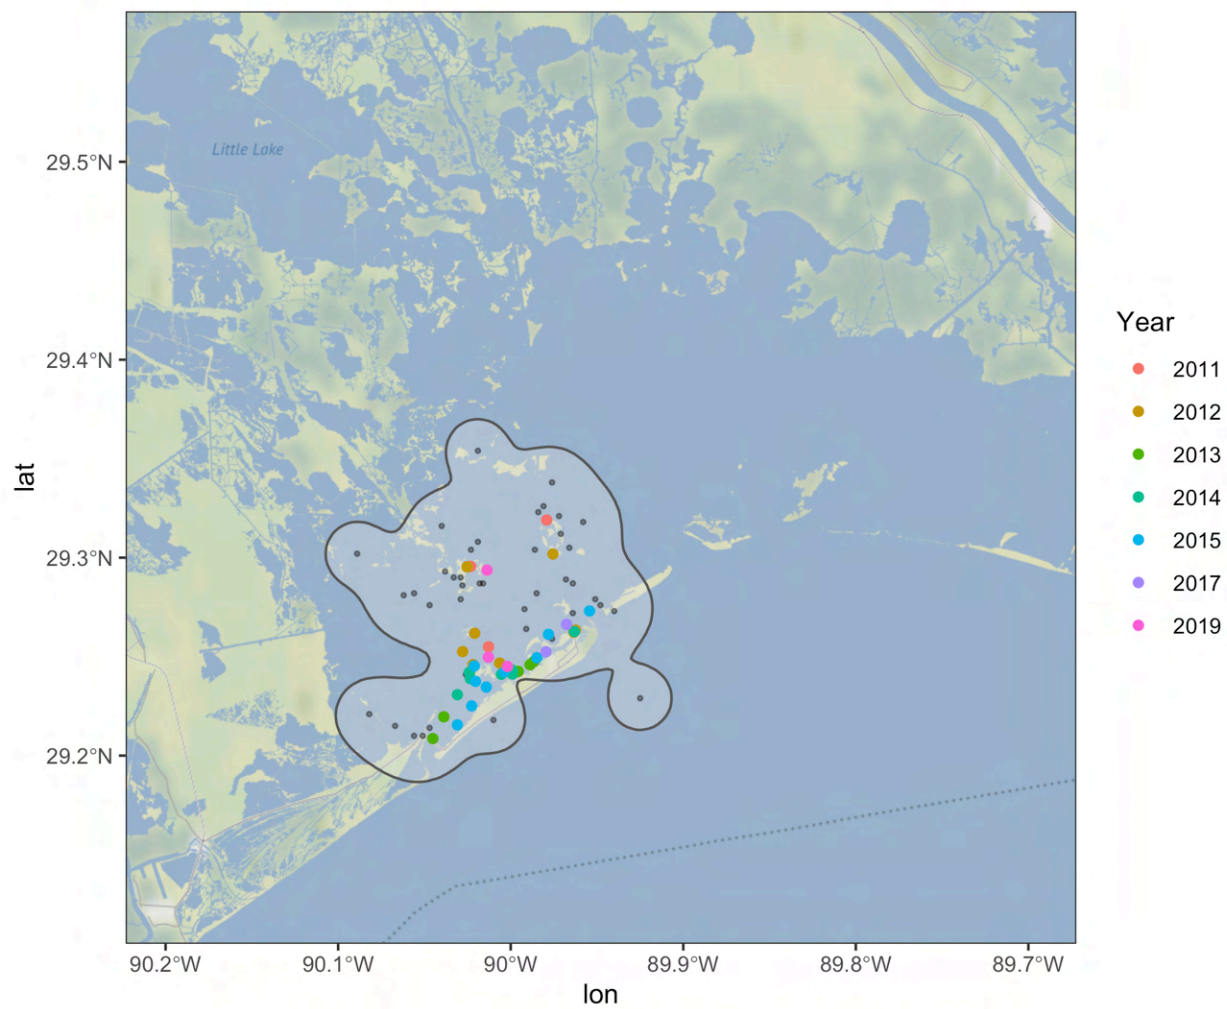



# Y16: Island

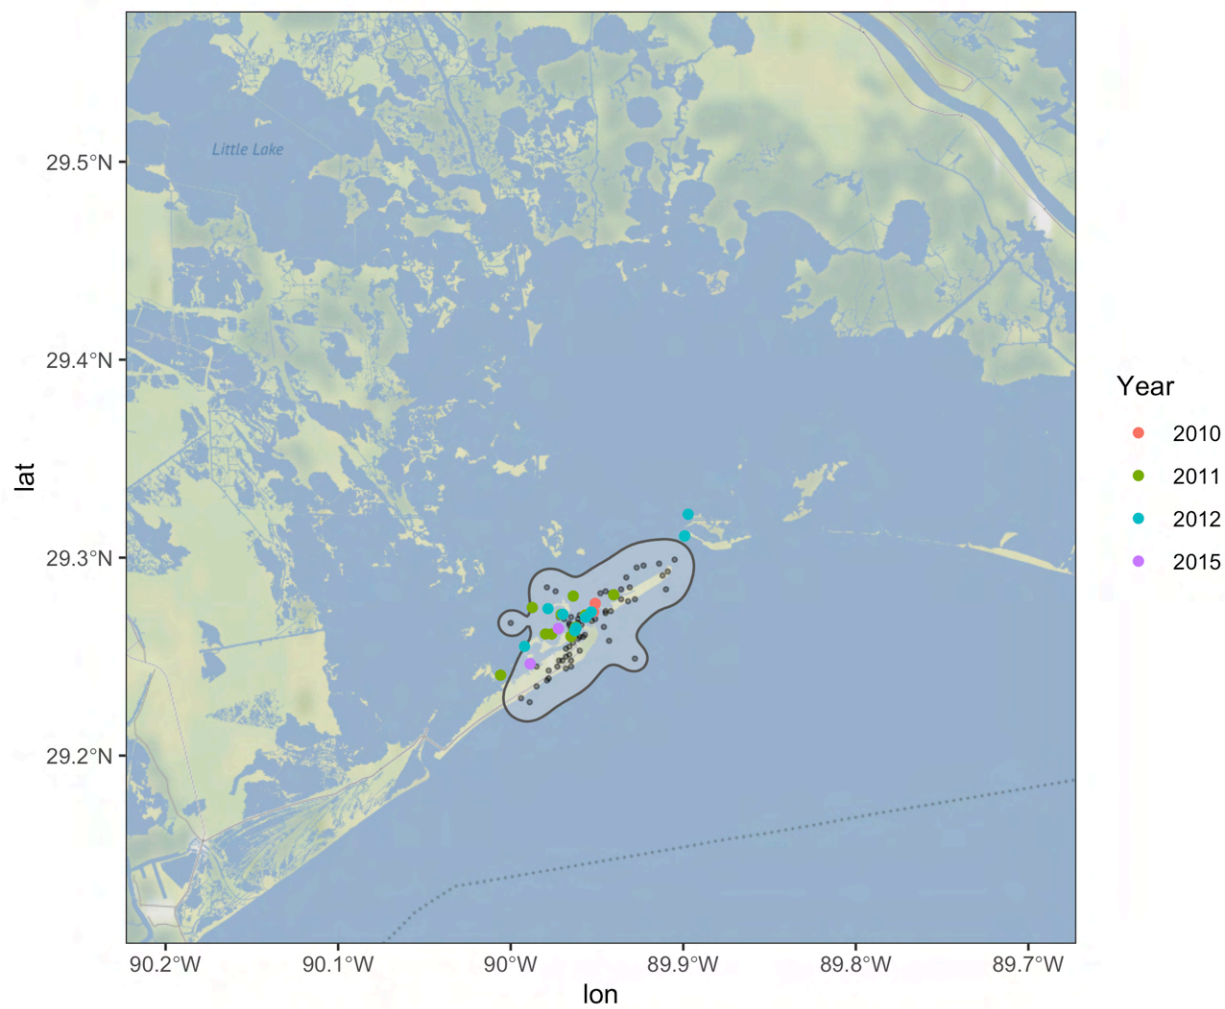



# Y17: Island

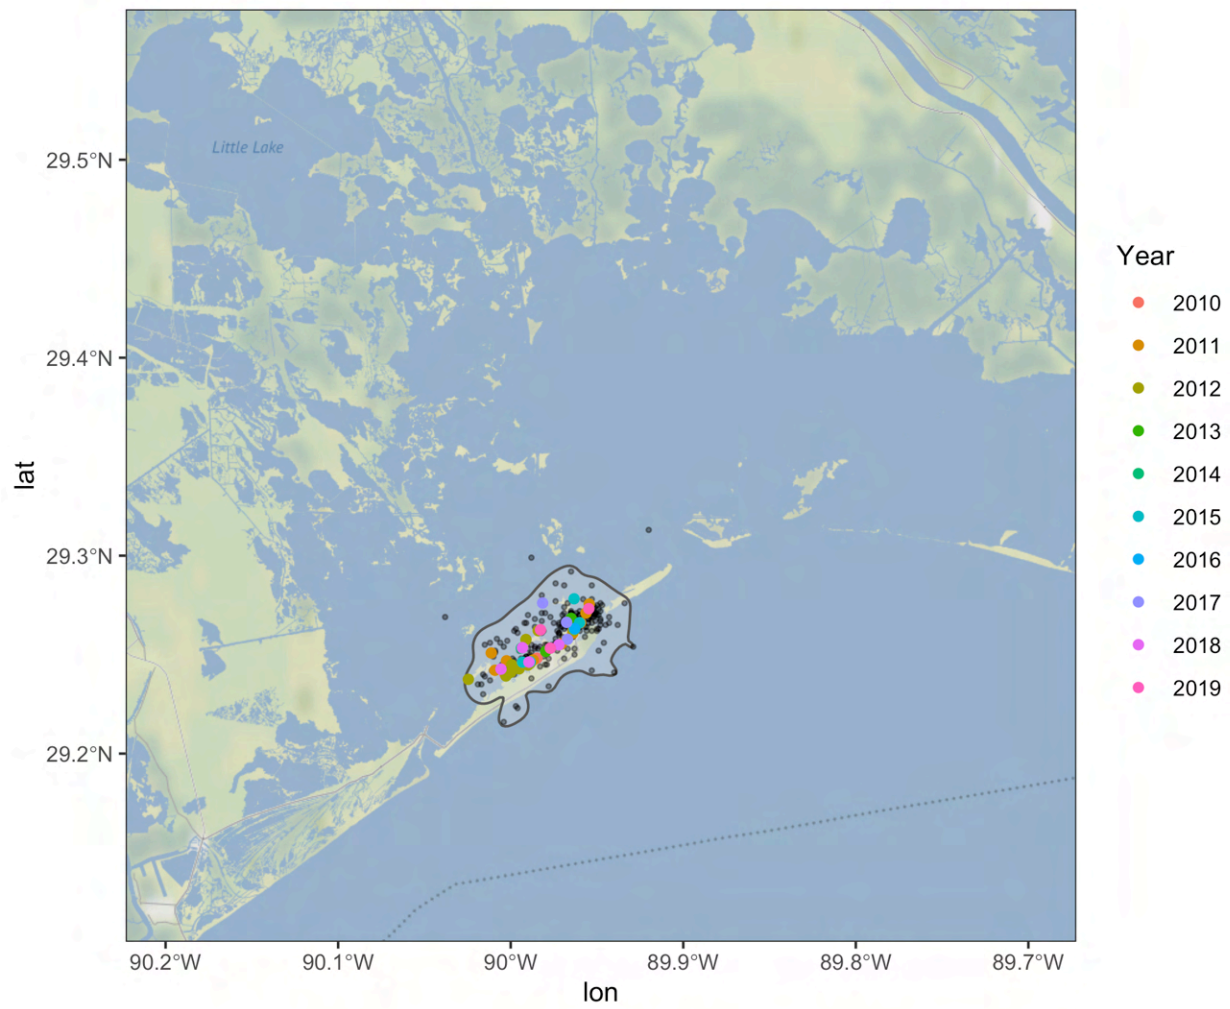

# Y18: Interior

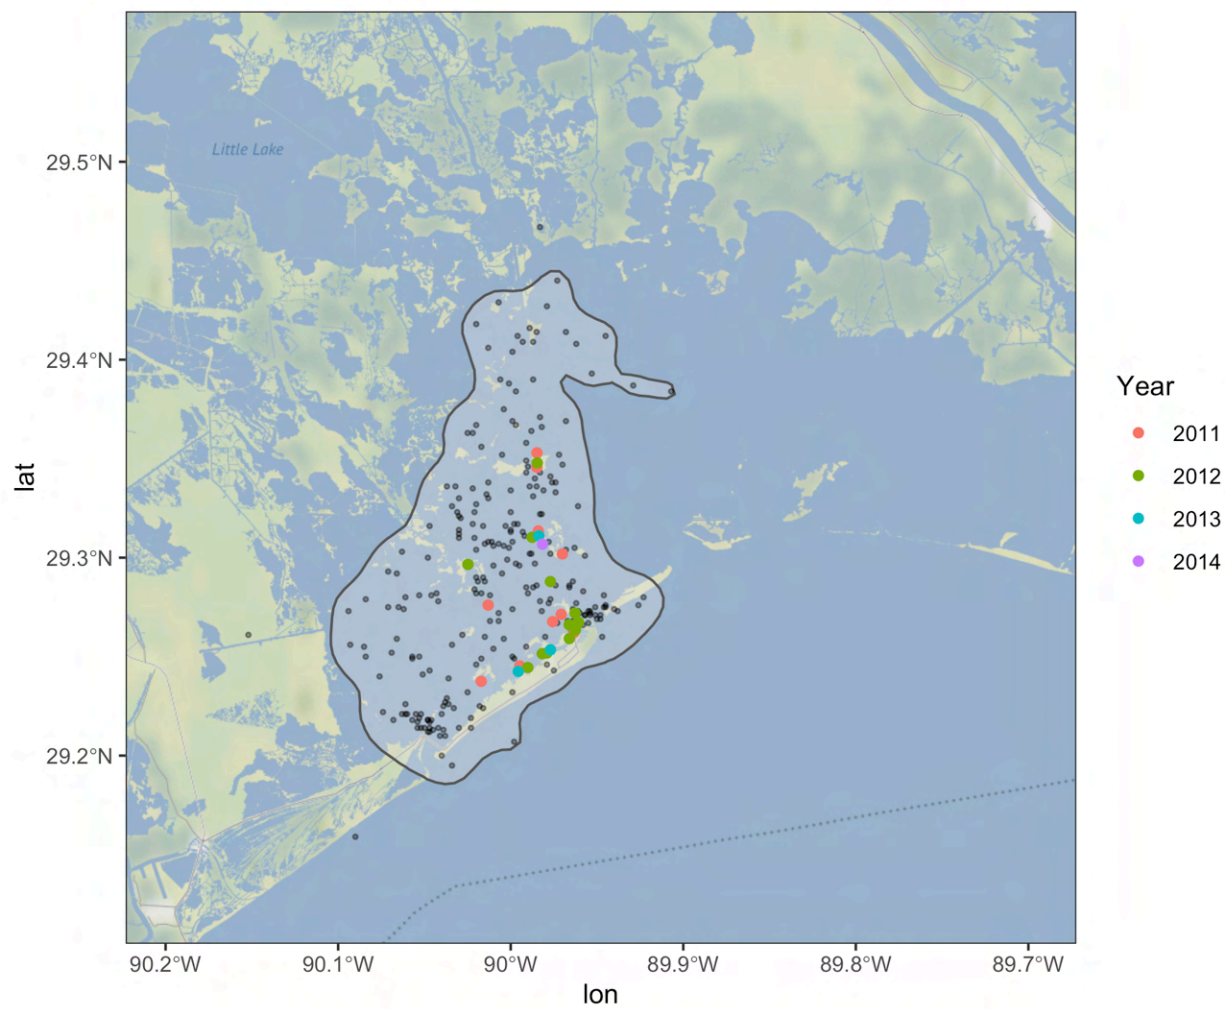

# Y19: Island

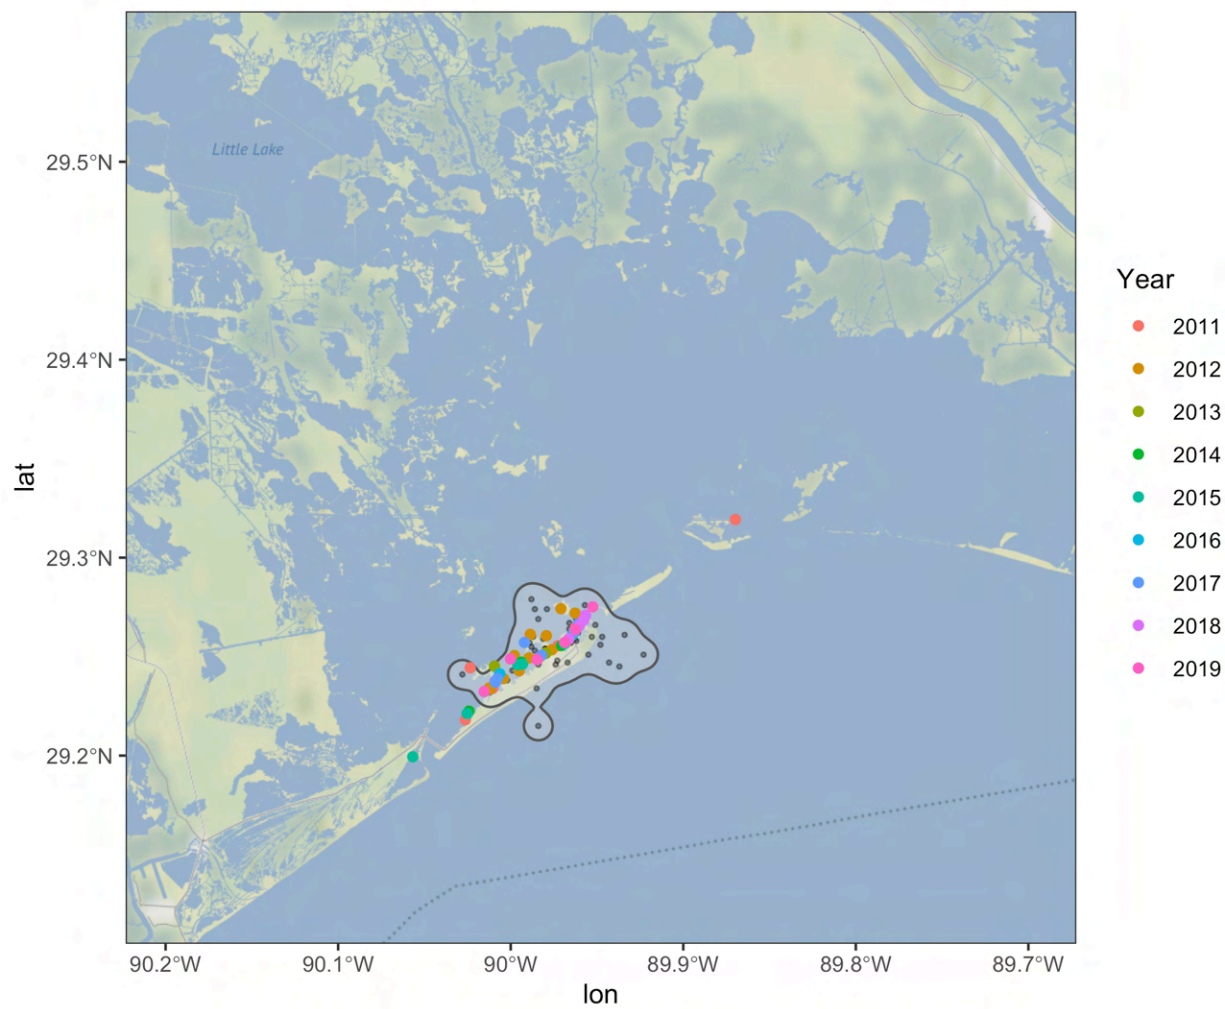

## Y20: Interior

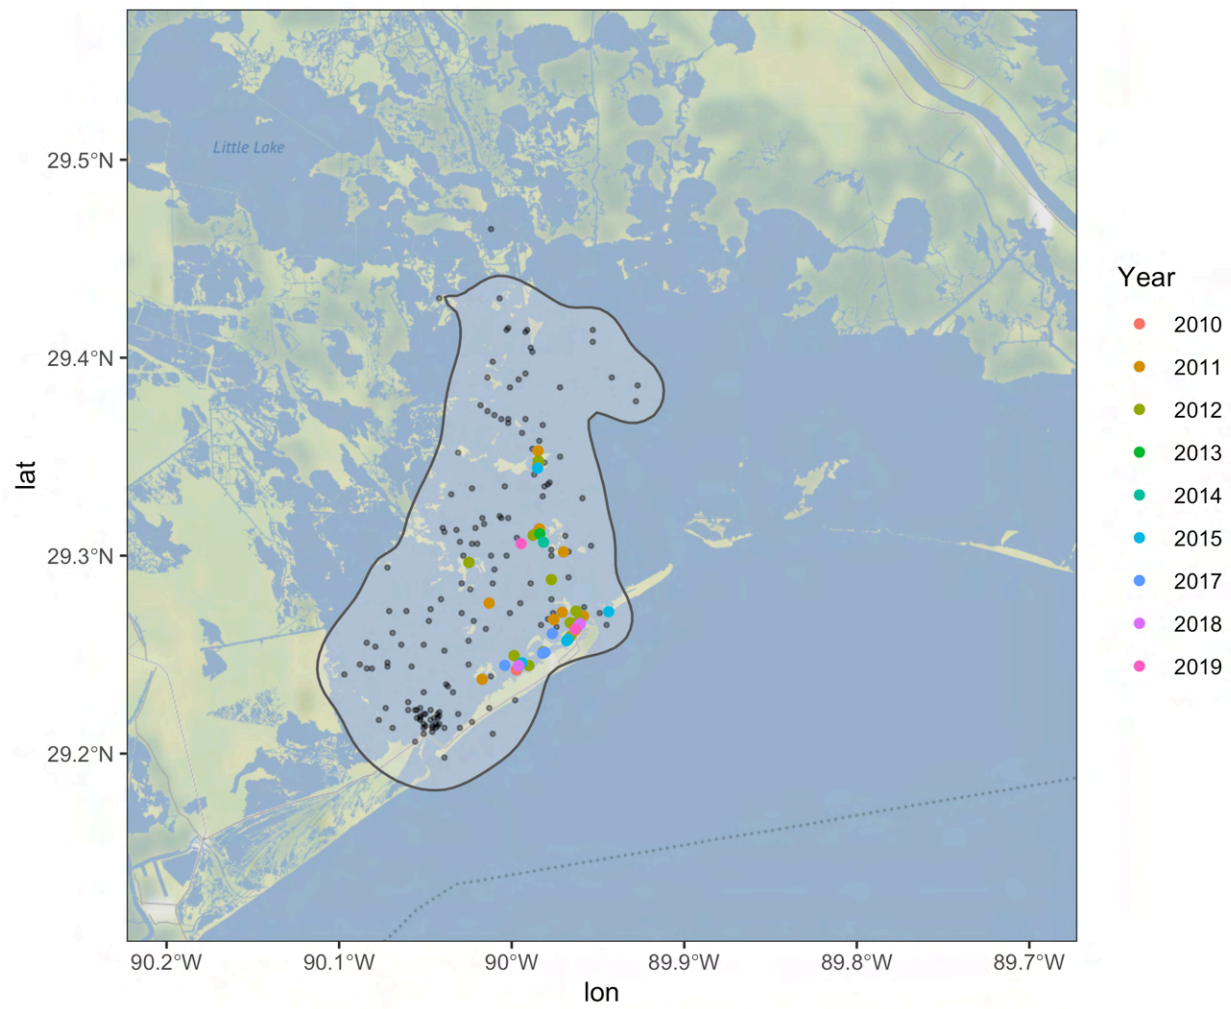

# Y22: Interior

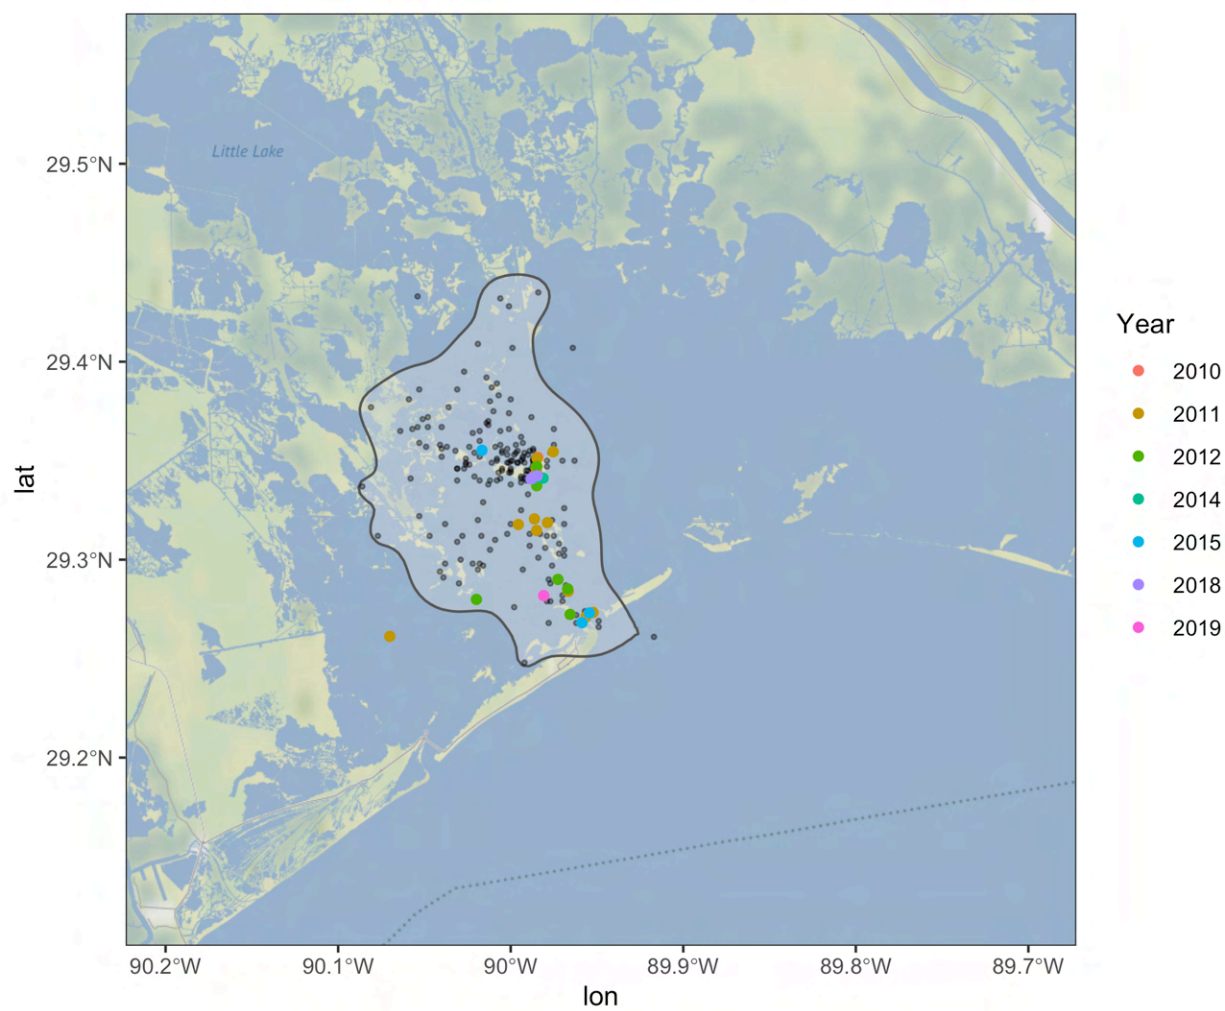



# Y25: Interior

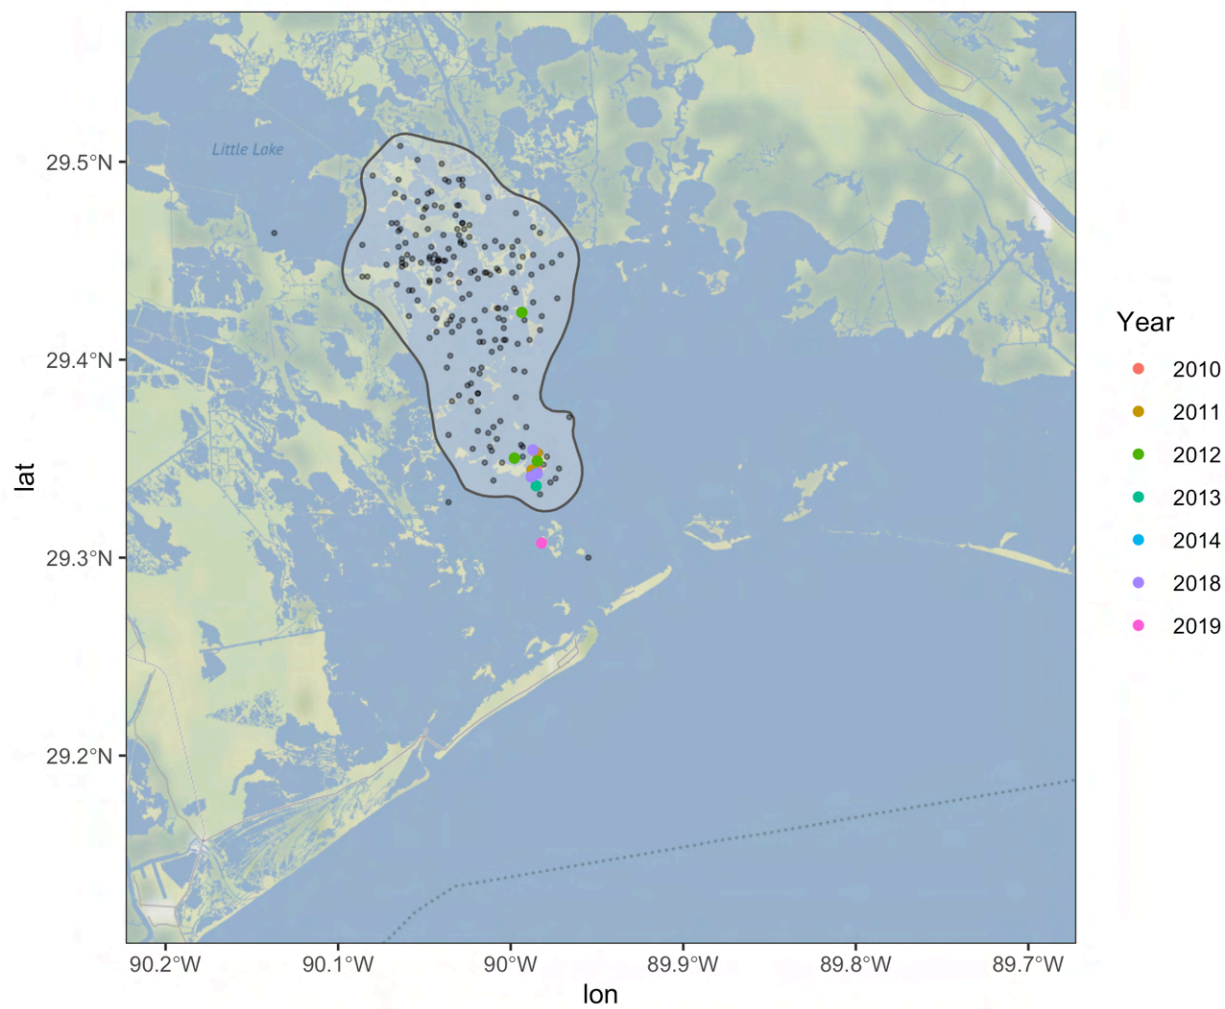



# Y27: Interior

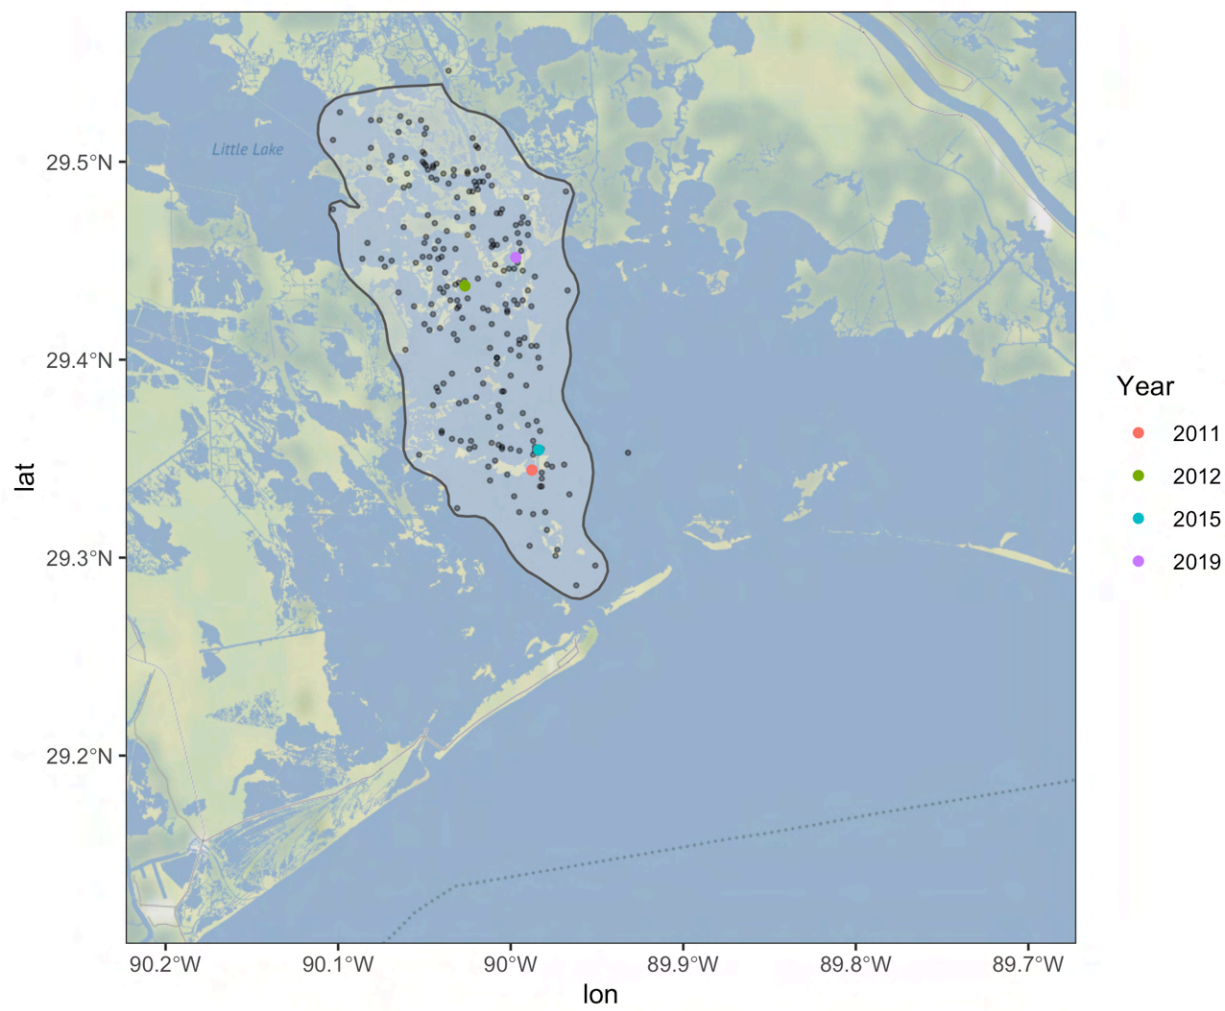

### Y33: Island

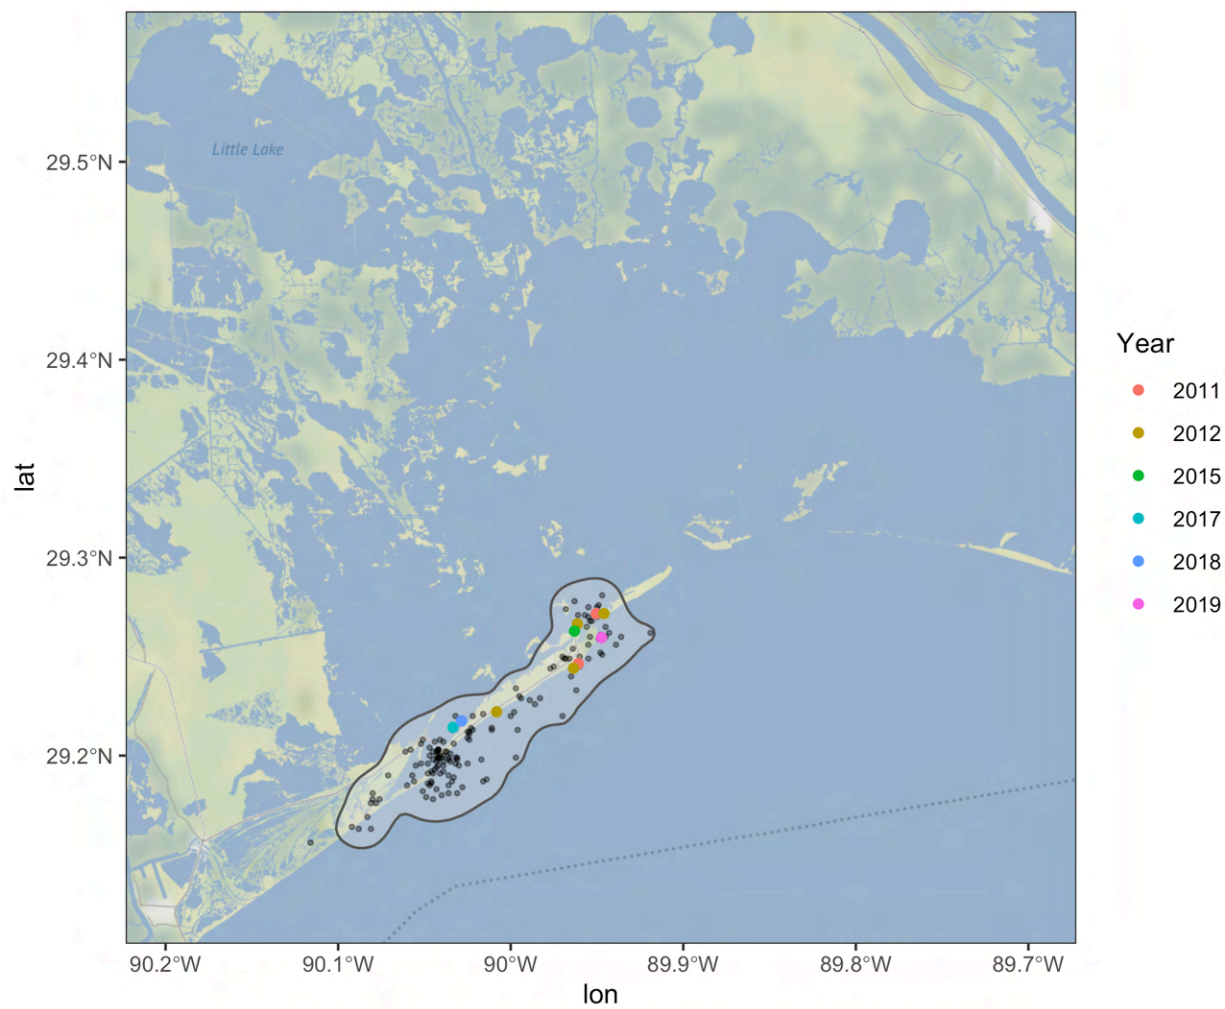

# Y37: Interior

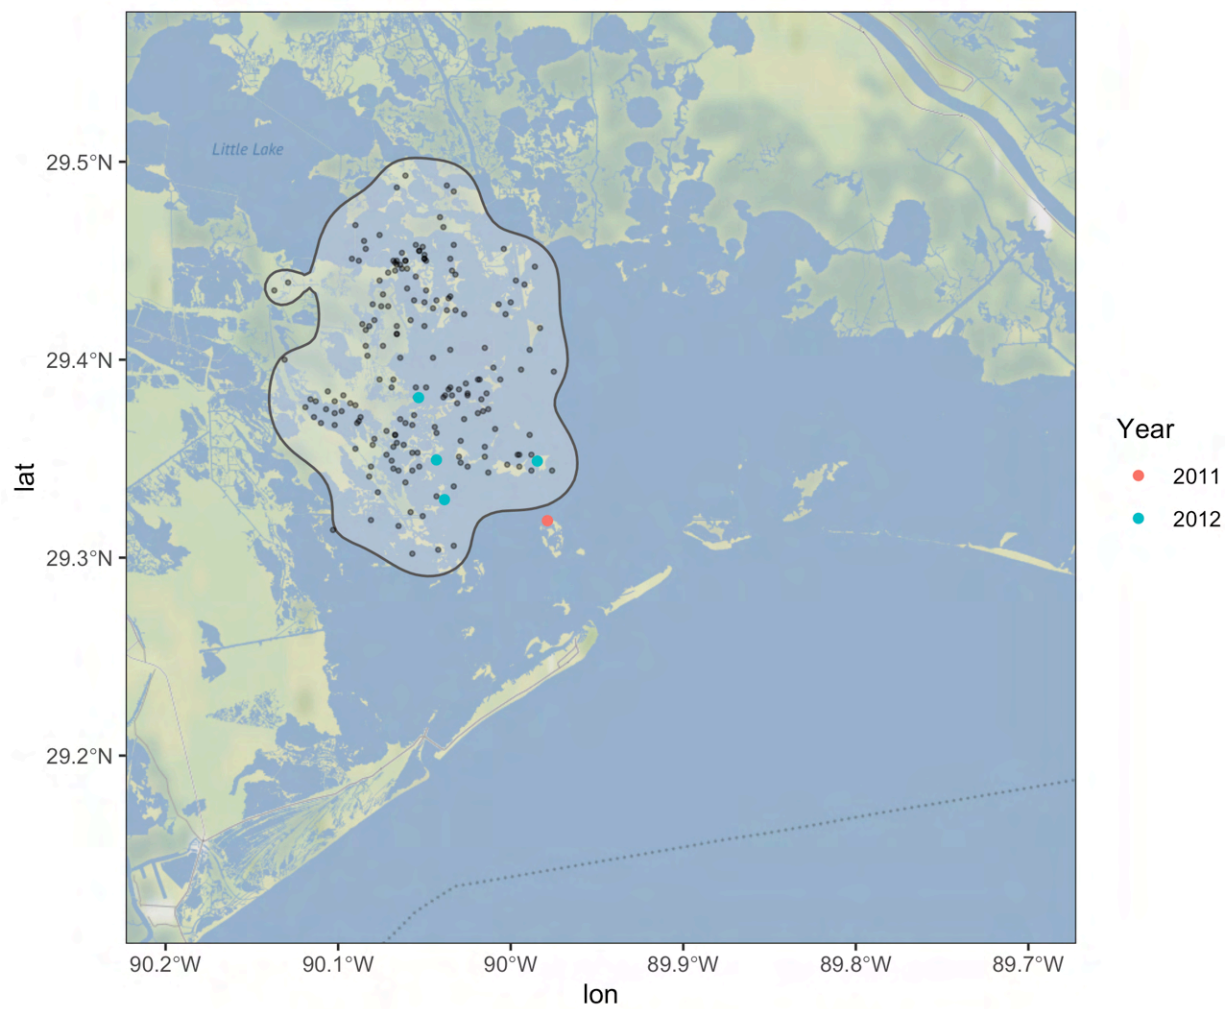

# Y38: Island

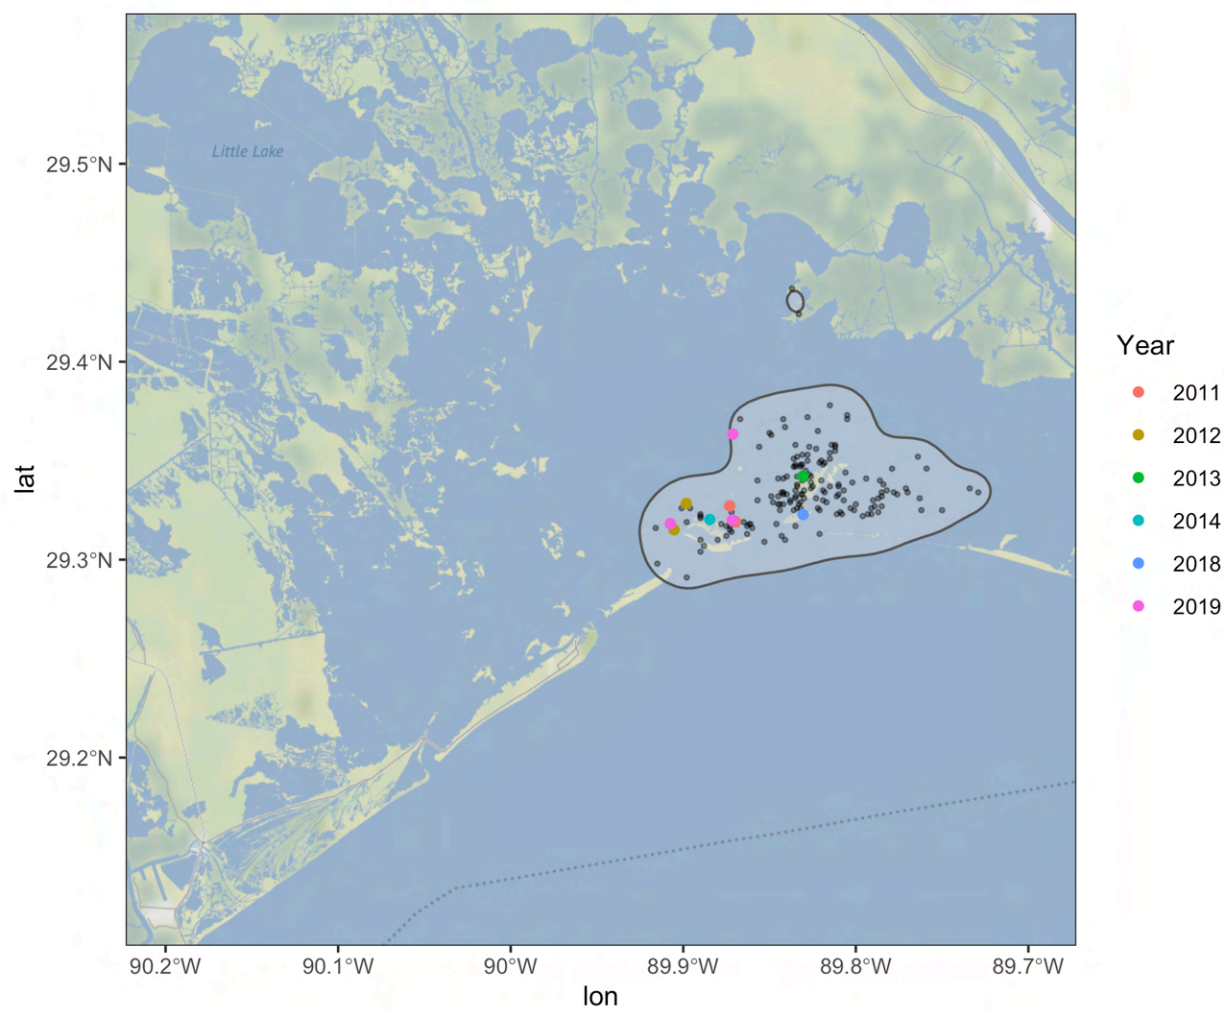

### Y39: Island

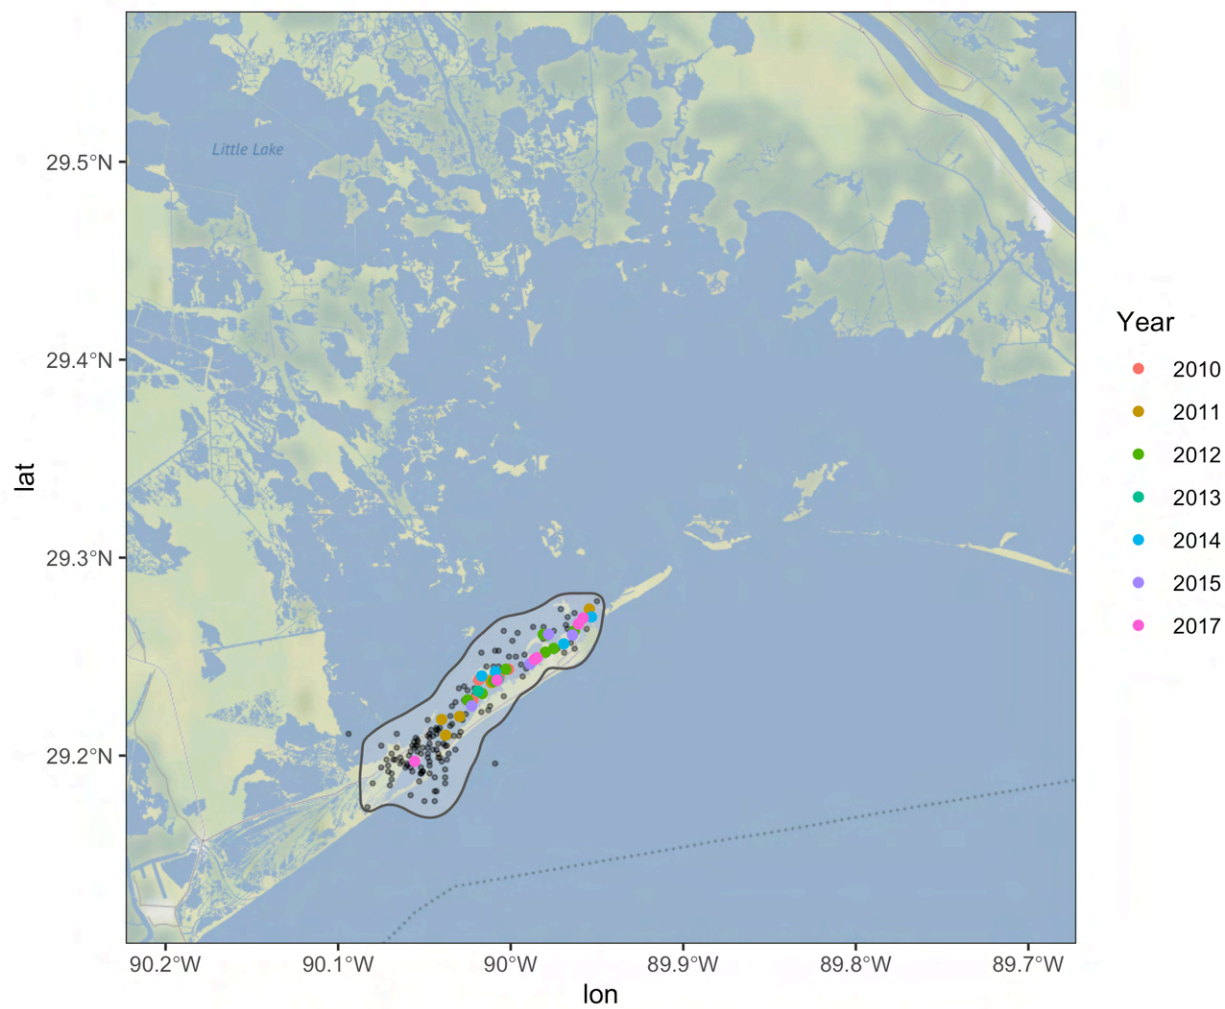



# Y40: Island

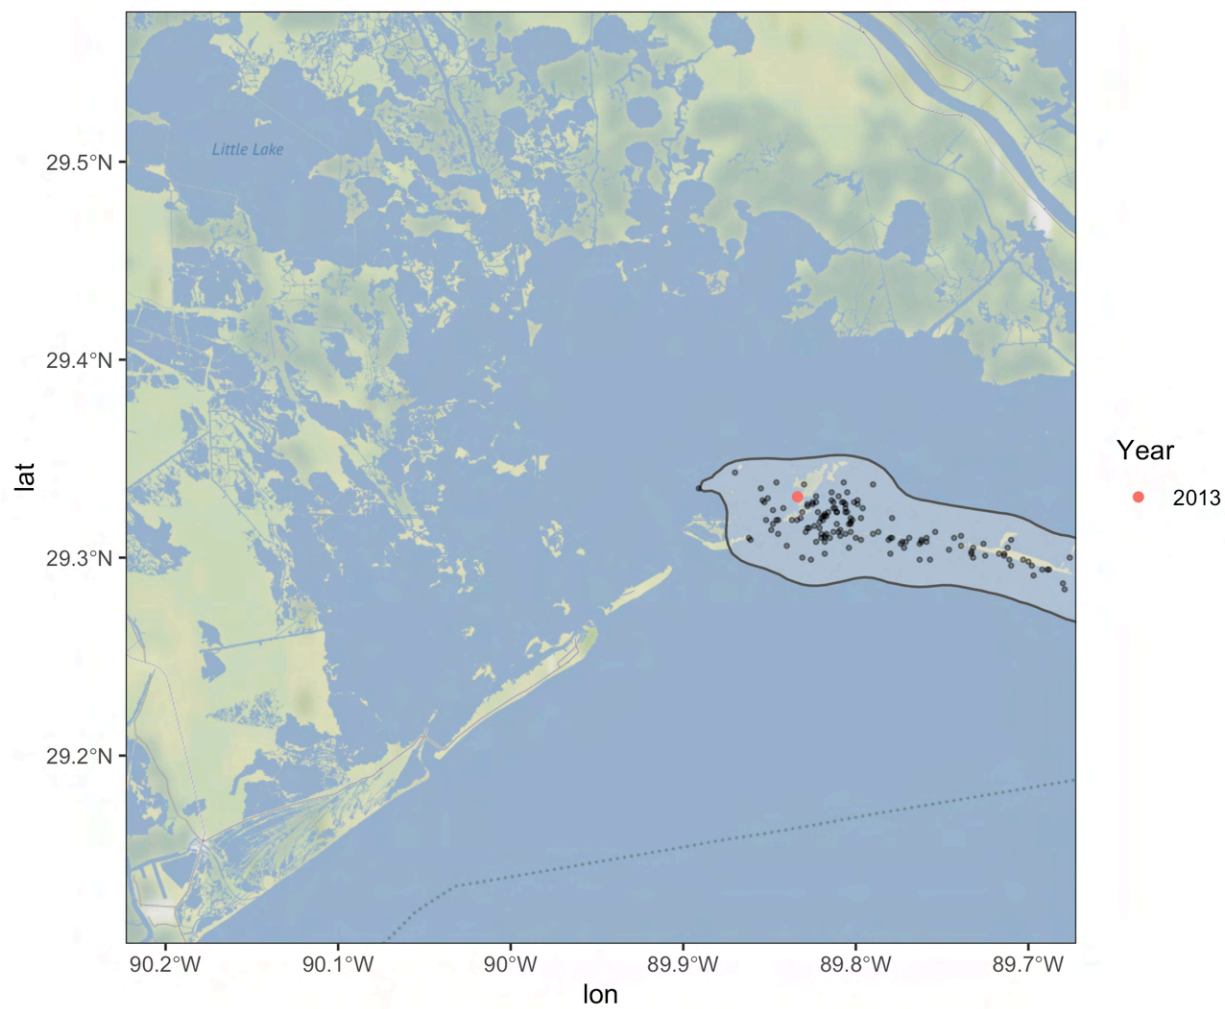



# Y42: Island

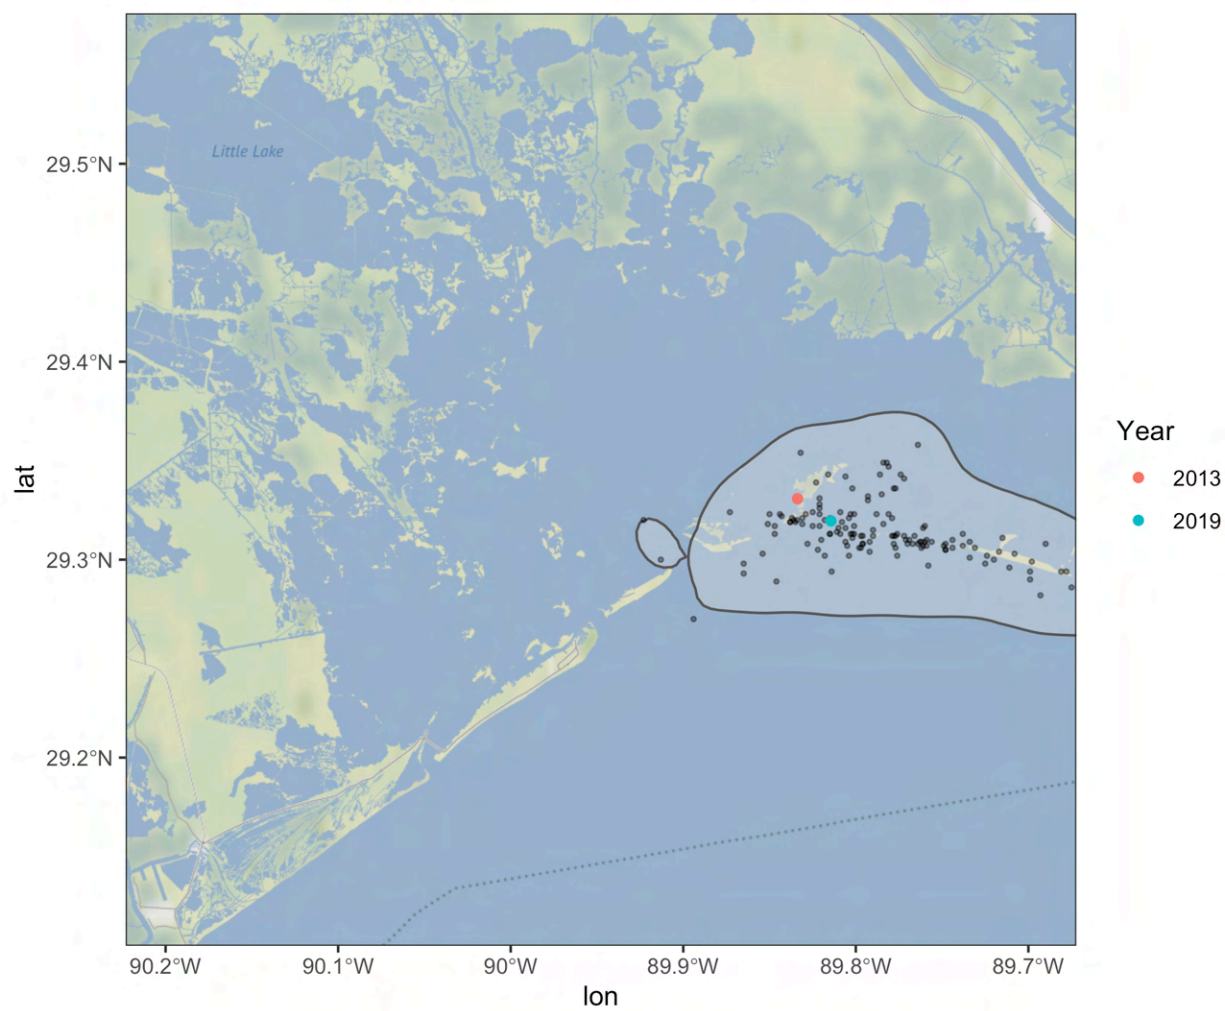

# Y44: Island

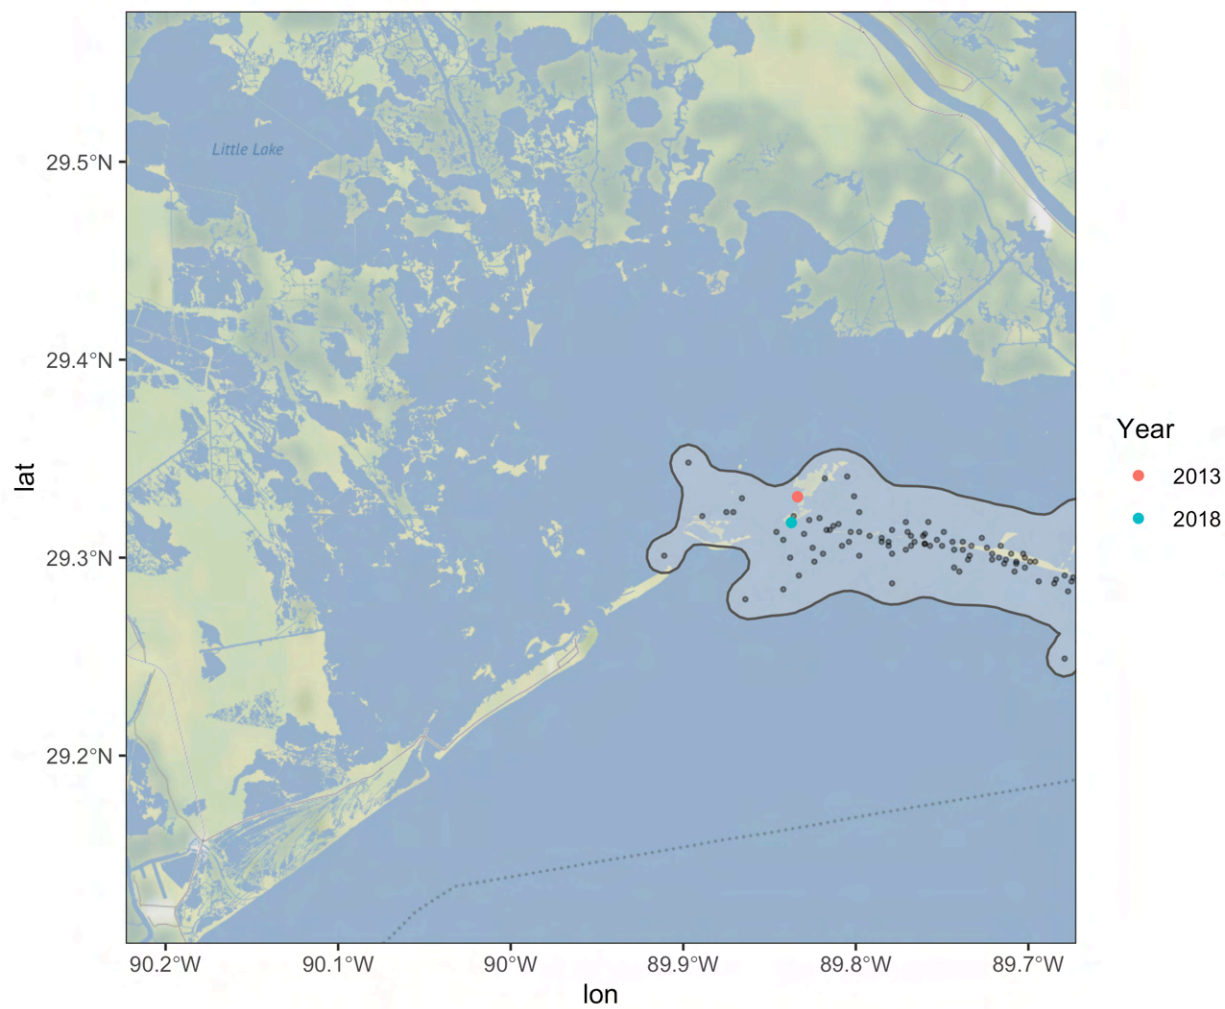

# Y46: Island

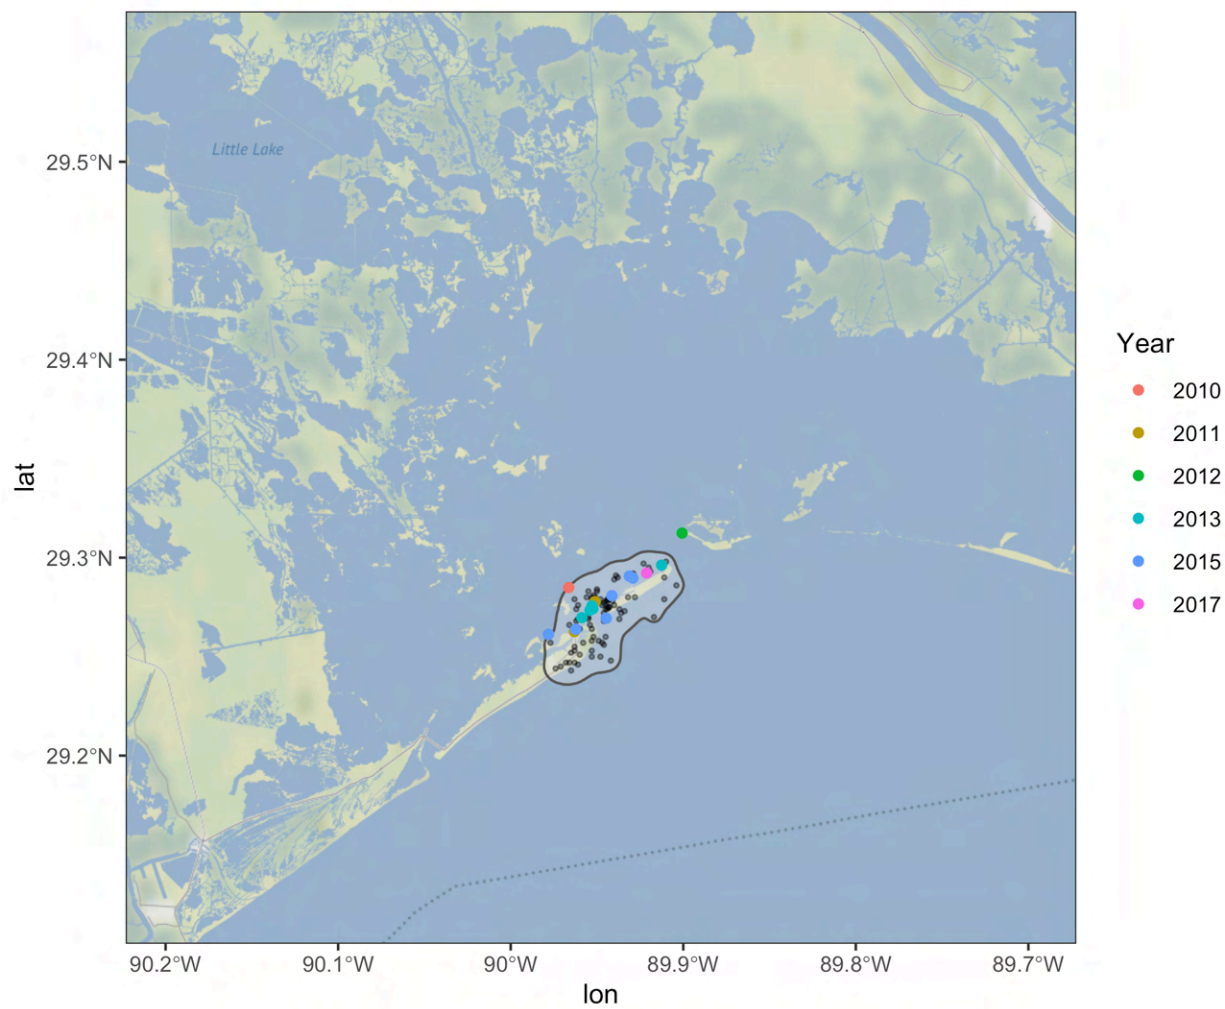

# Y65: Island

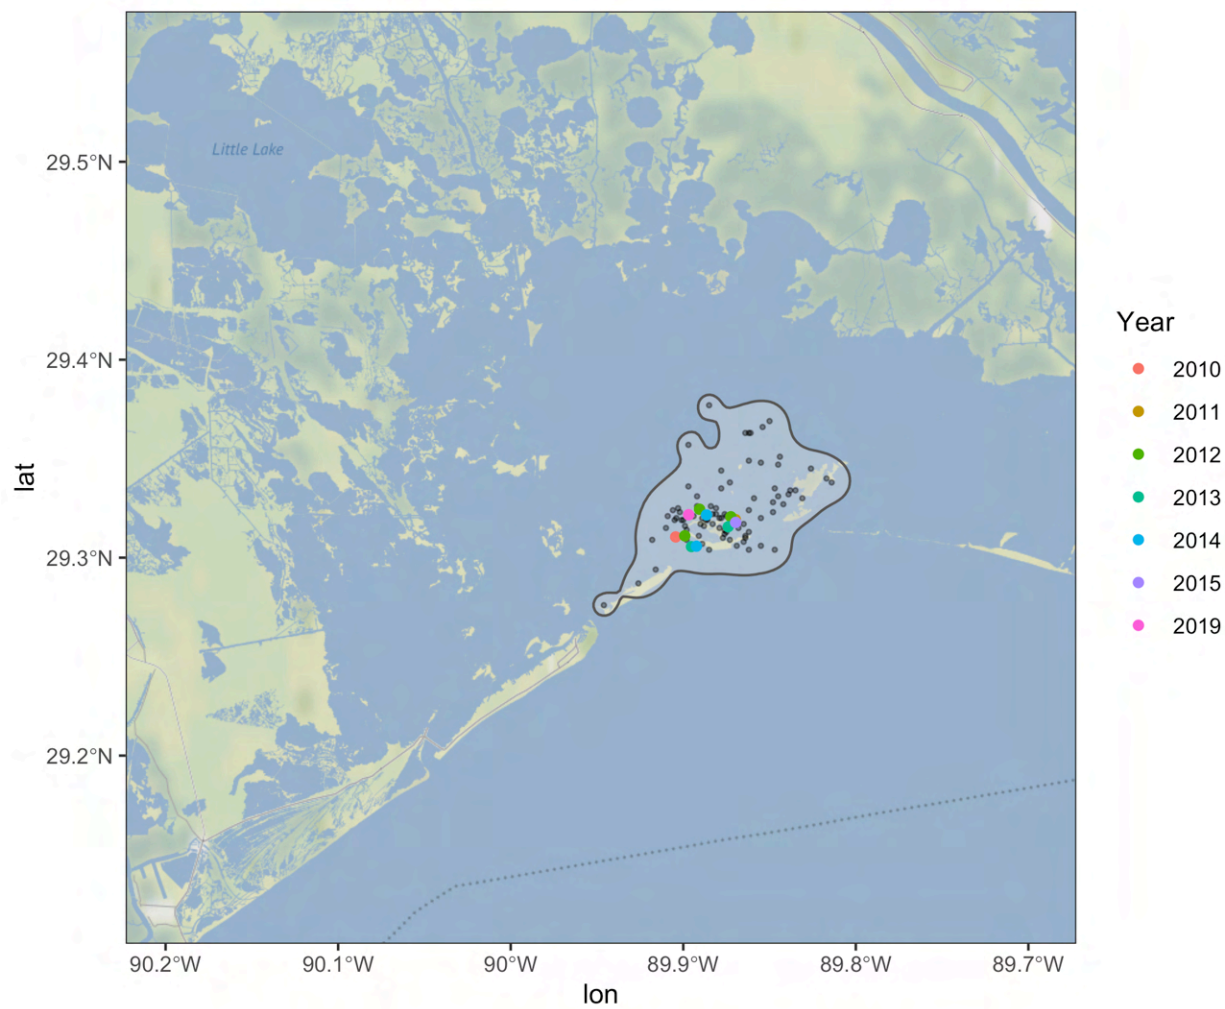

# Y67: Island

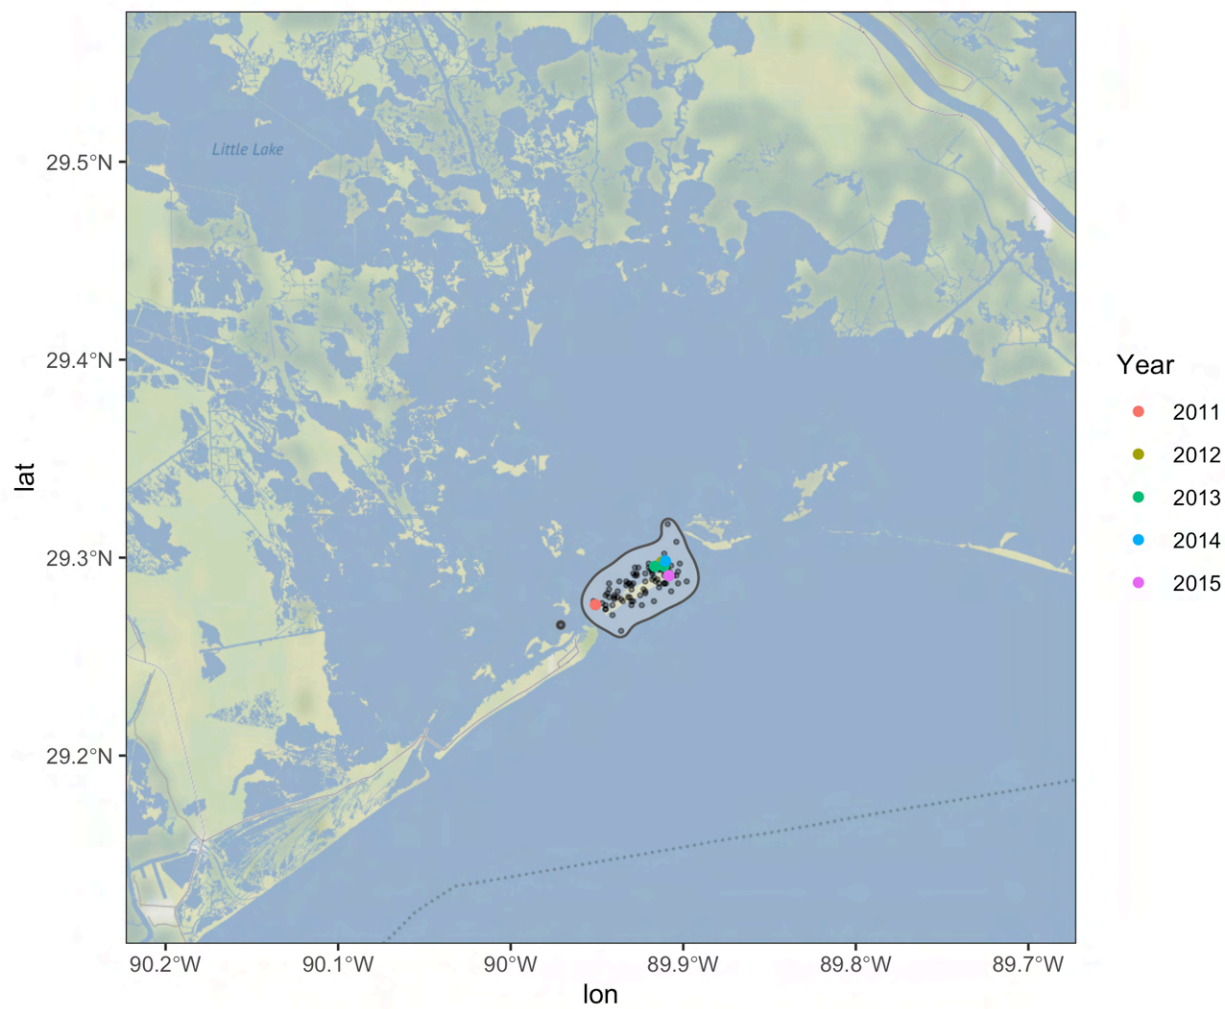



# Y69: Island

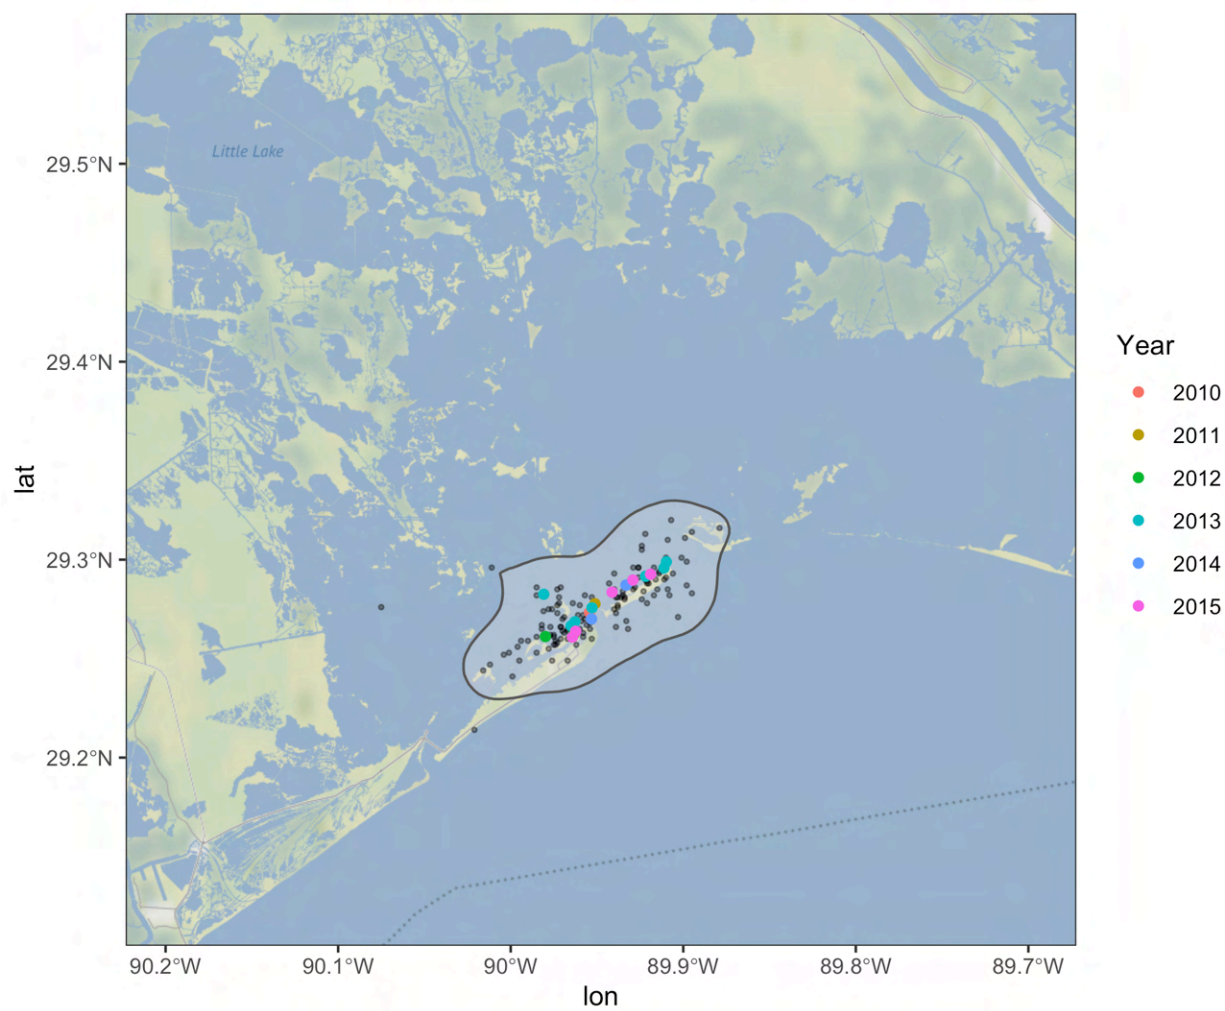

# Y71: Island

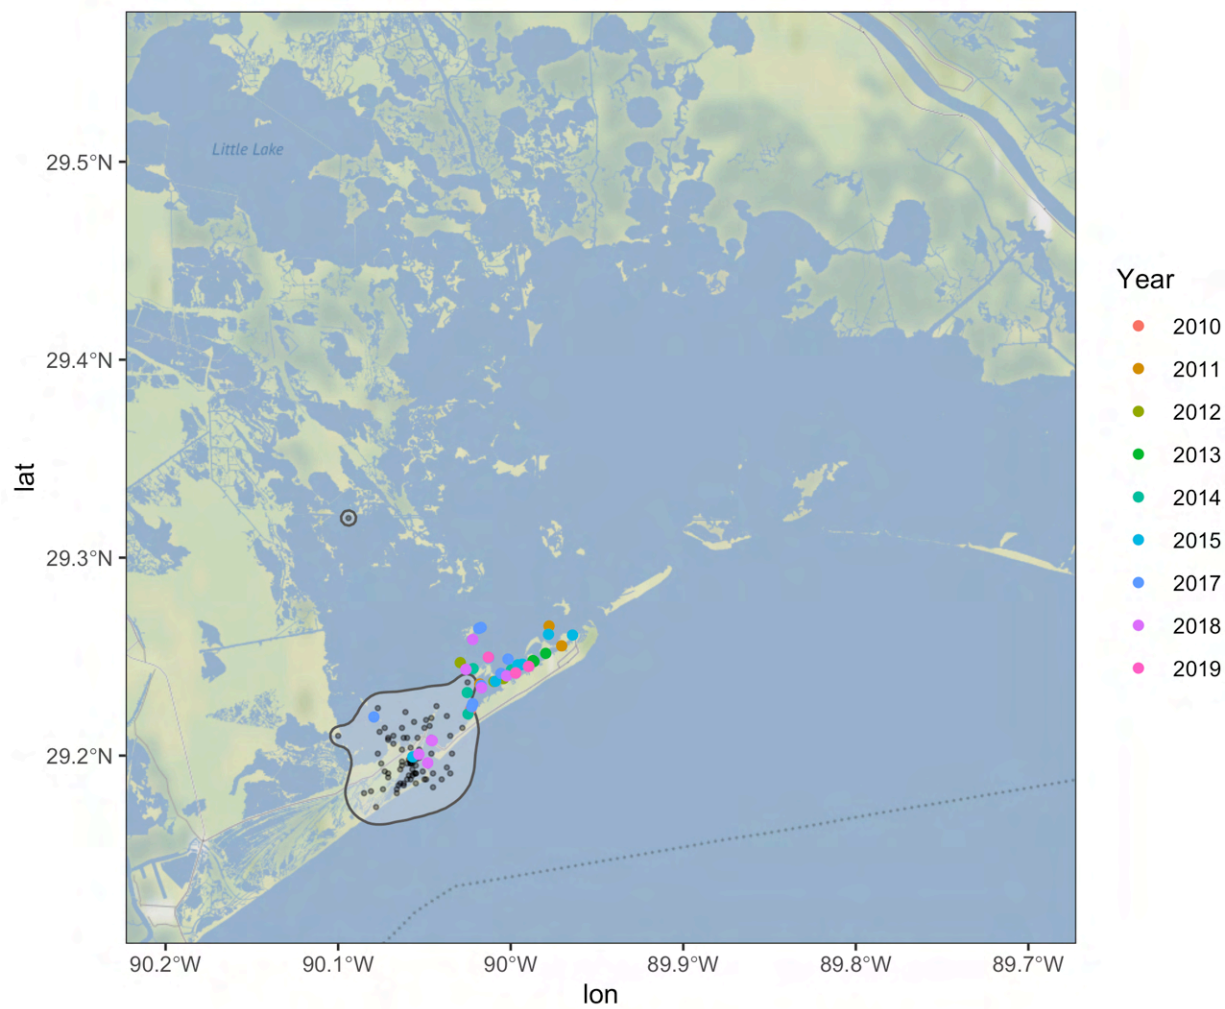

# Y75: Interior

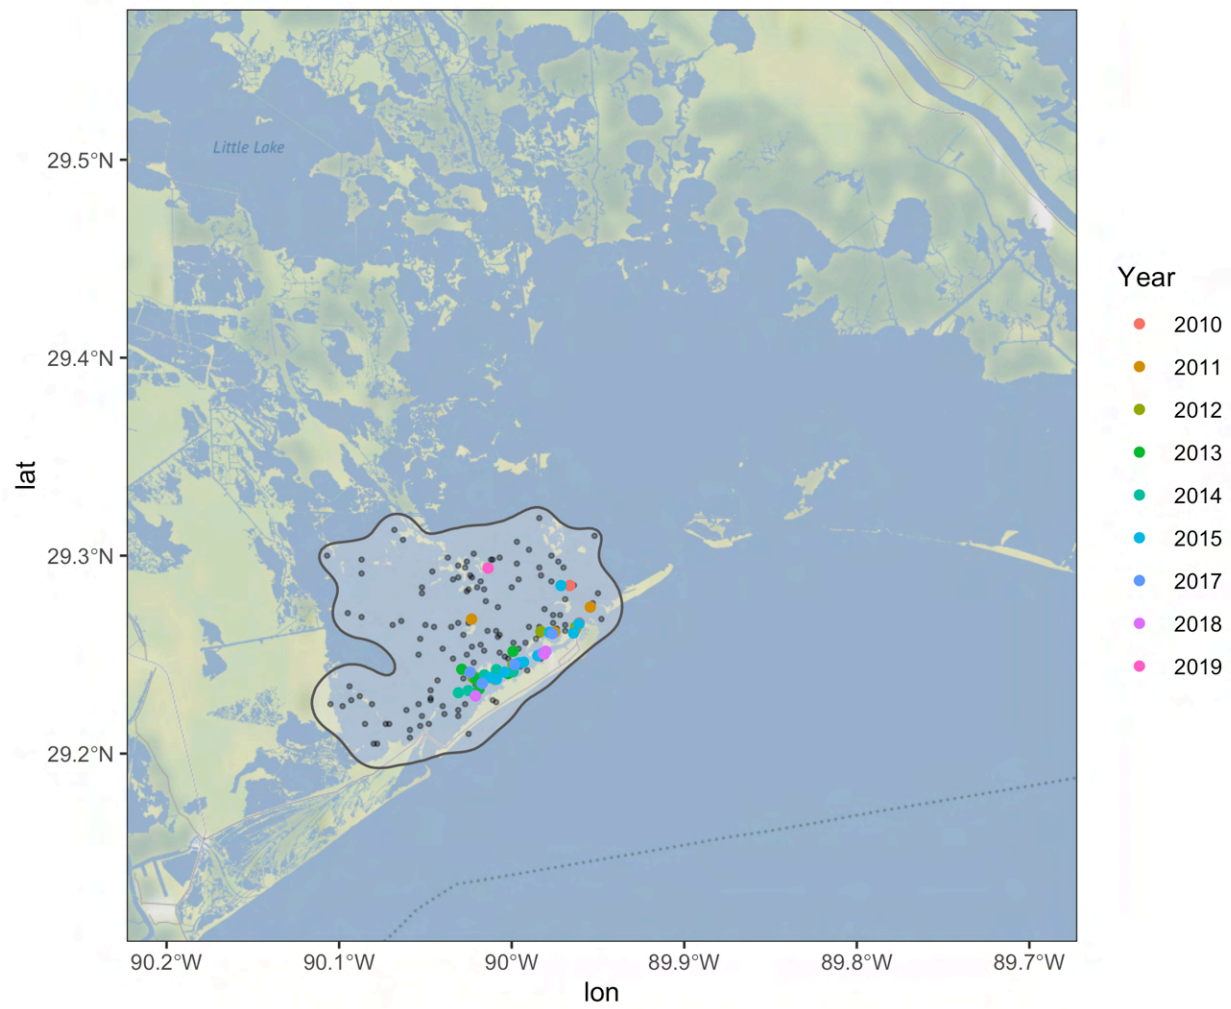

# Y79: Island

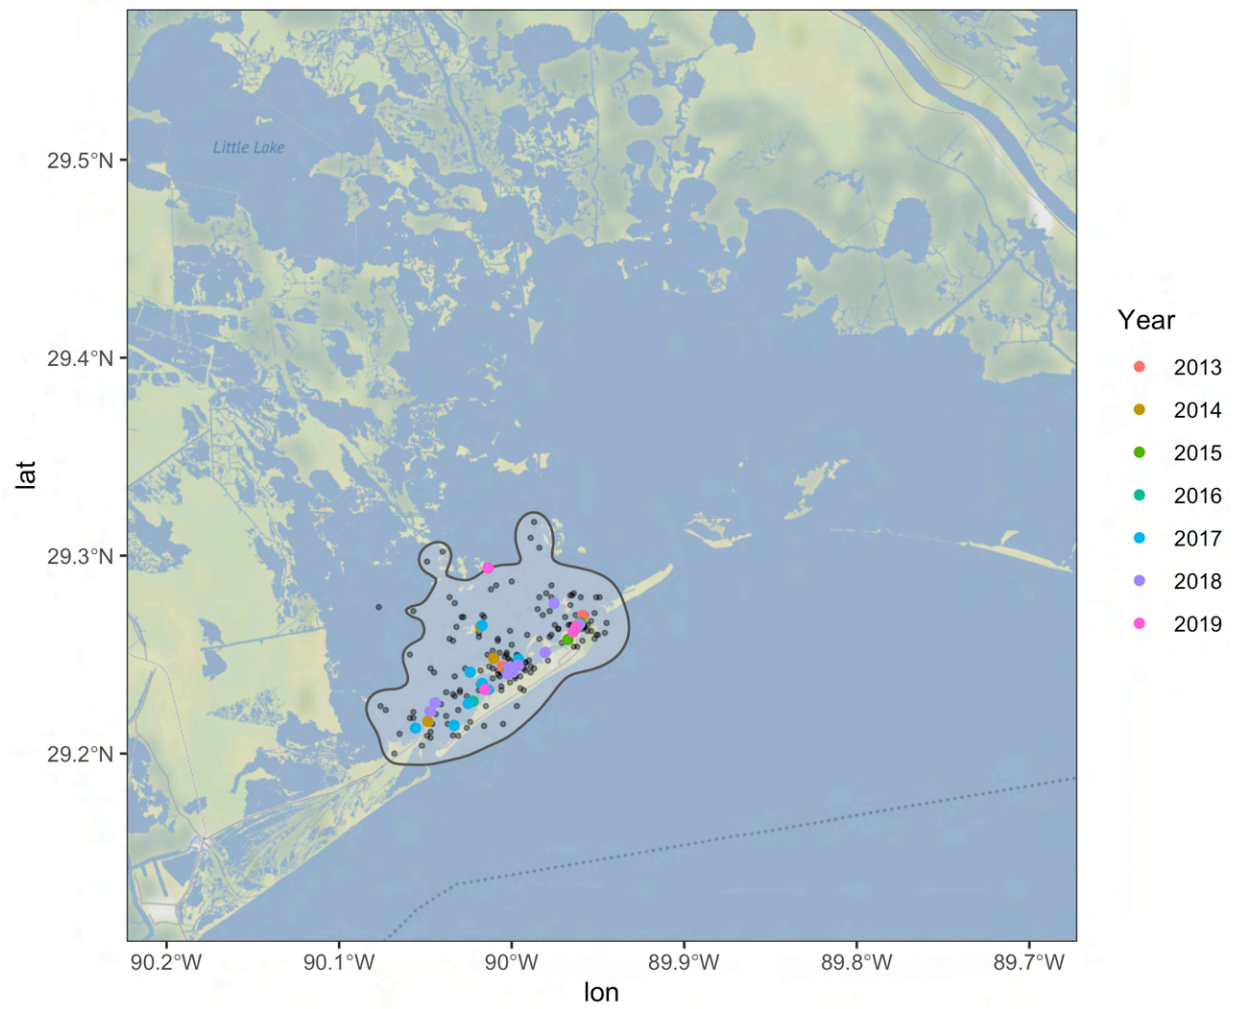

# Y80: Island

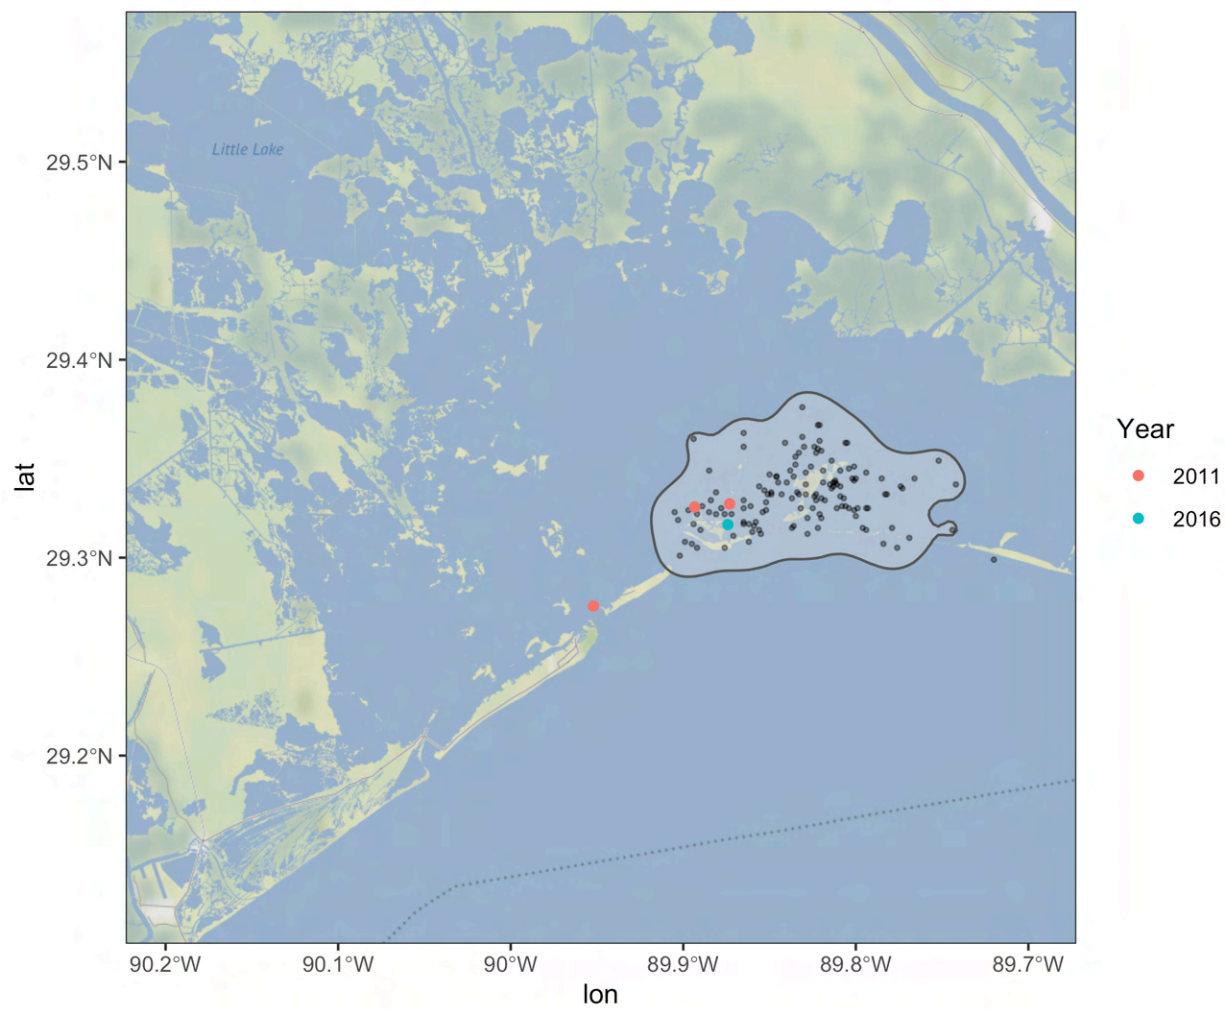



# Y81: Island

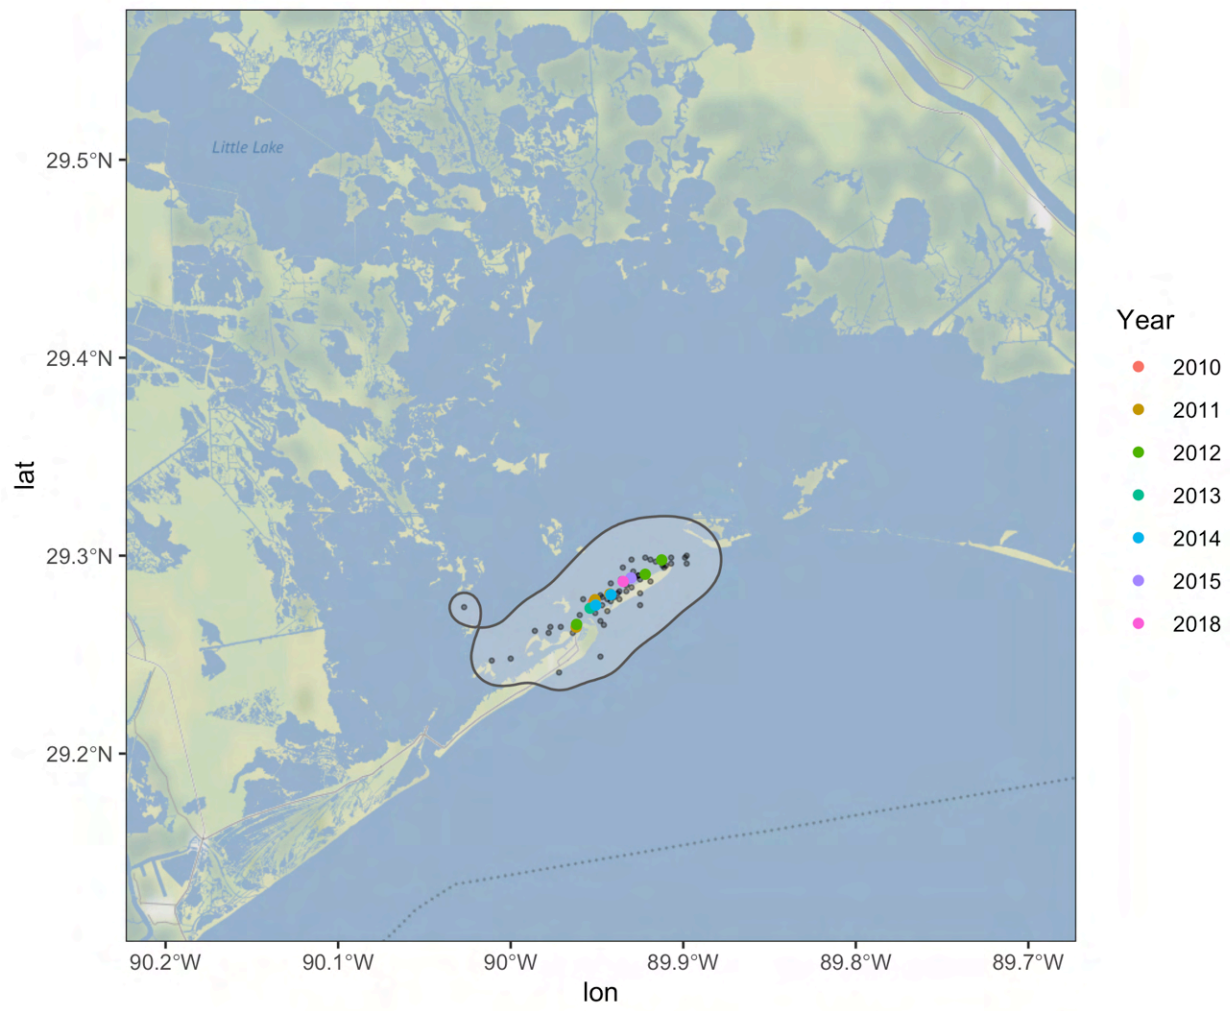

# Y83: Island

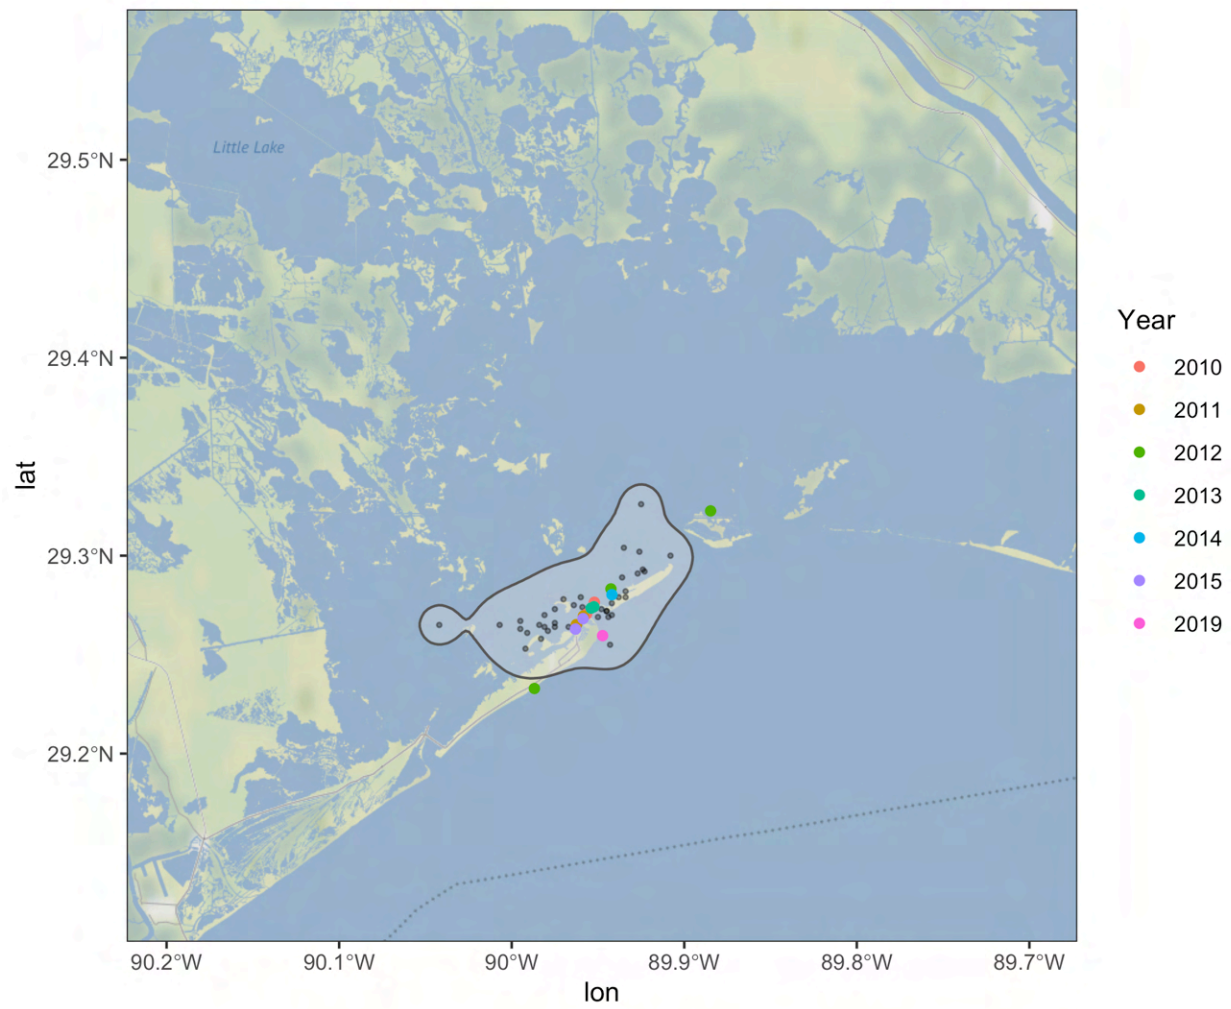

# Y85: Island

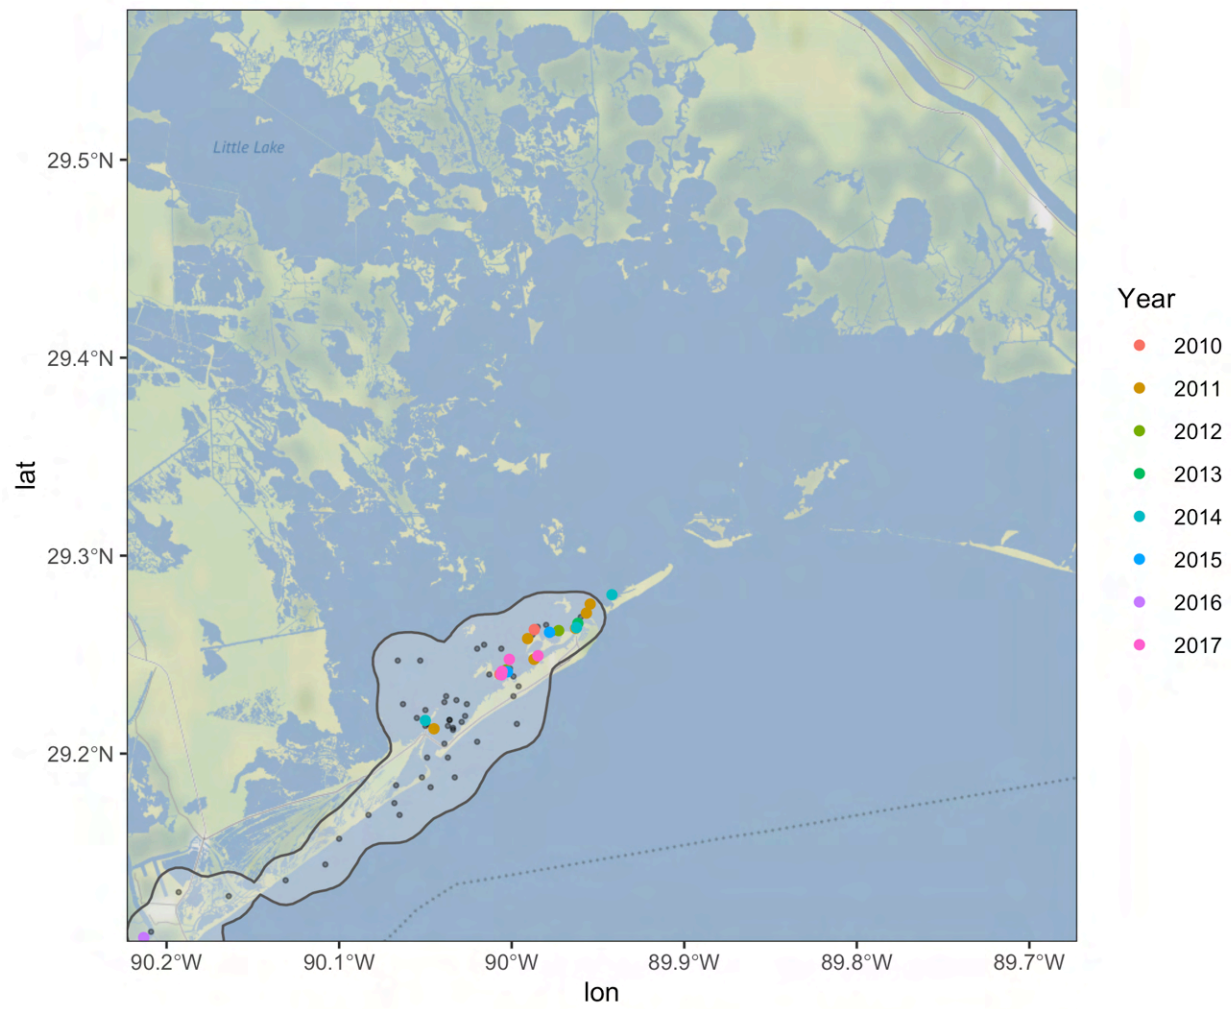

# Y88: Interior

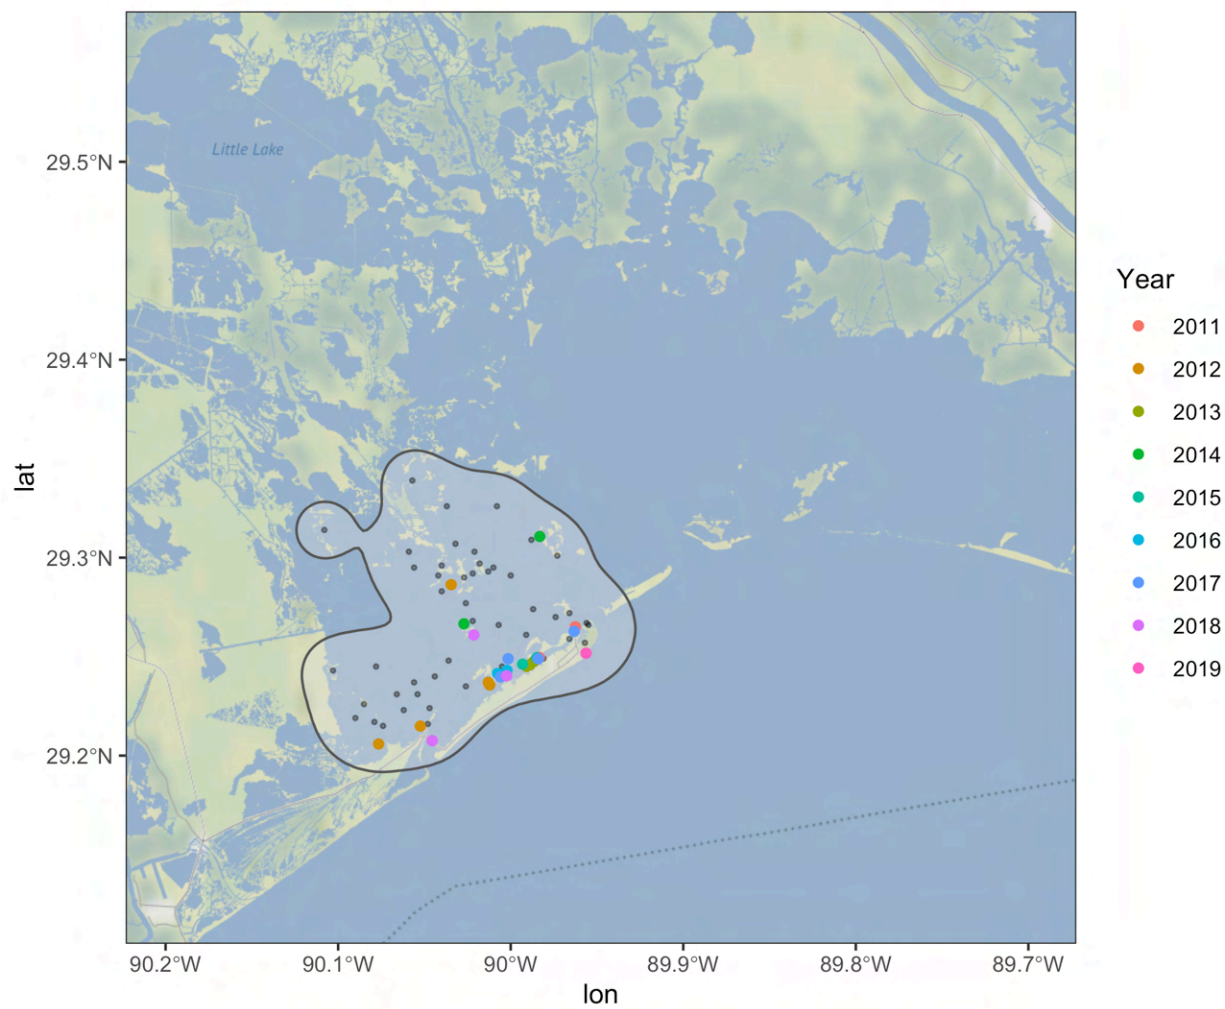

# Y91: Island

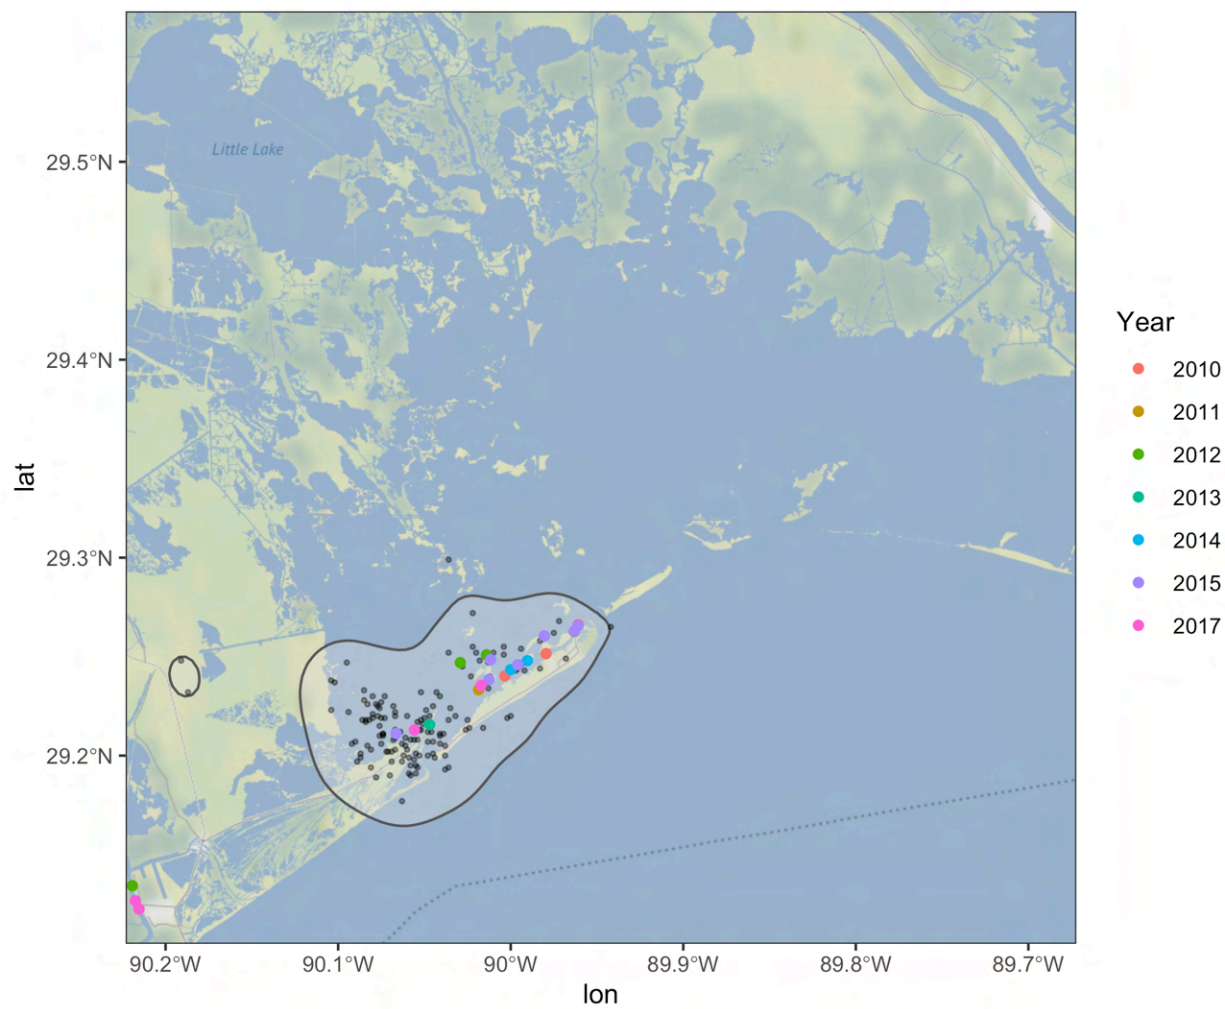



Y94: Interior

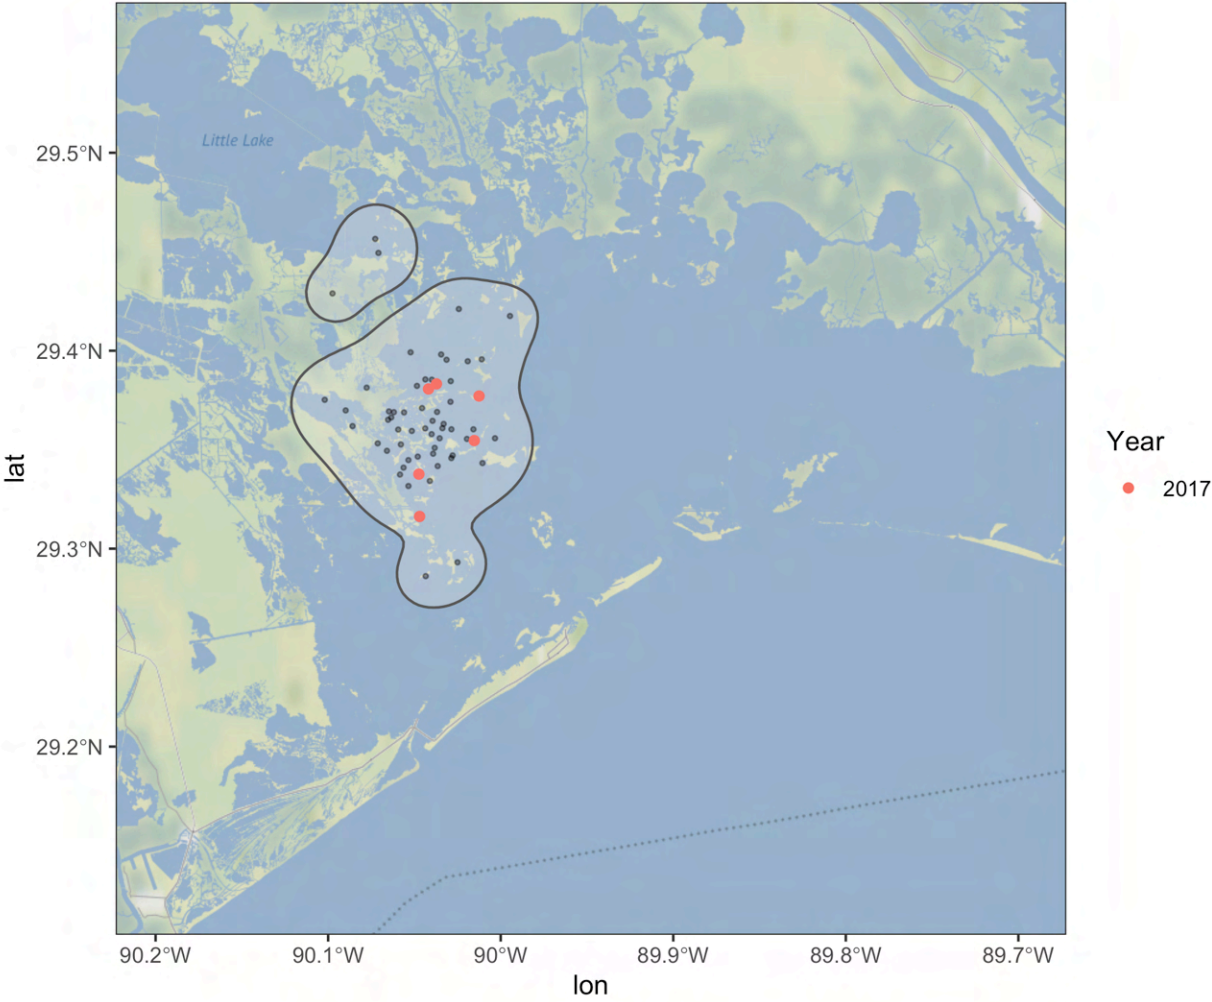

# Y96: Interior

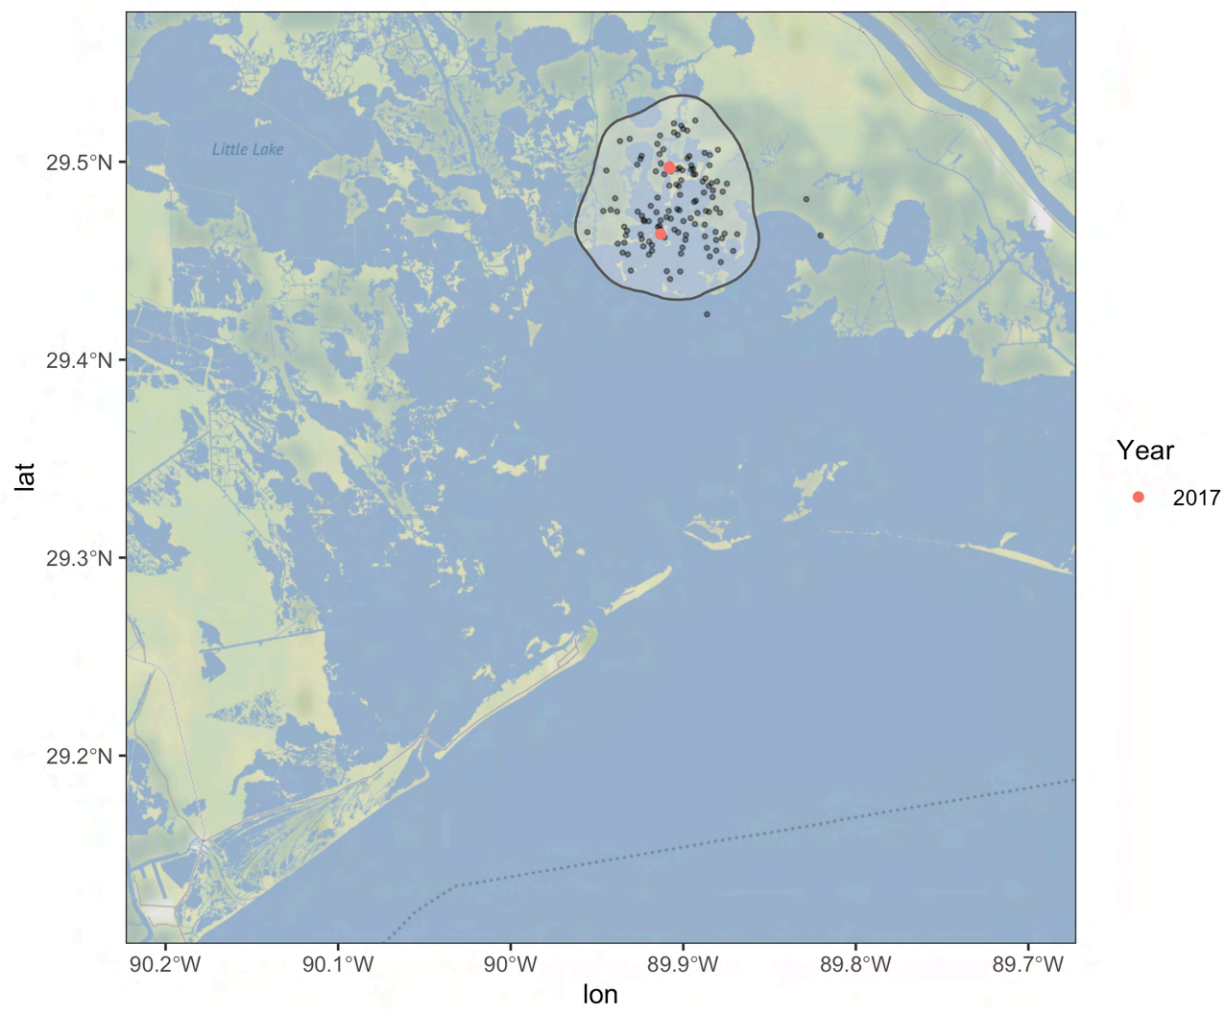

# Y97: Interior

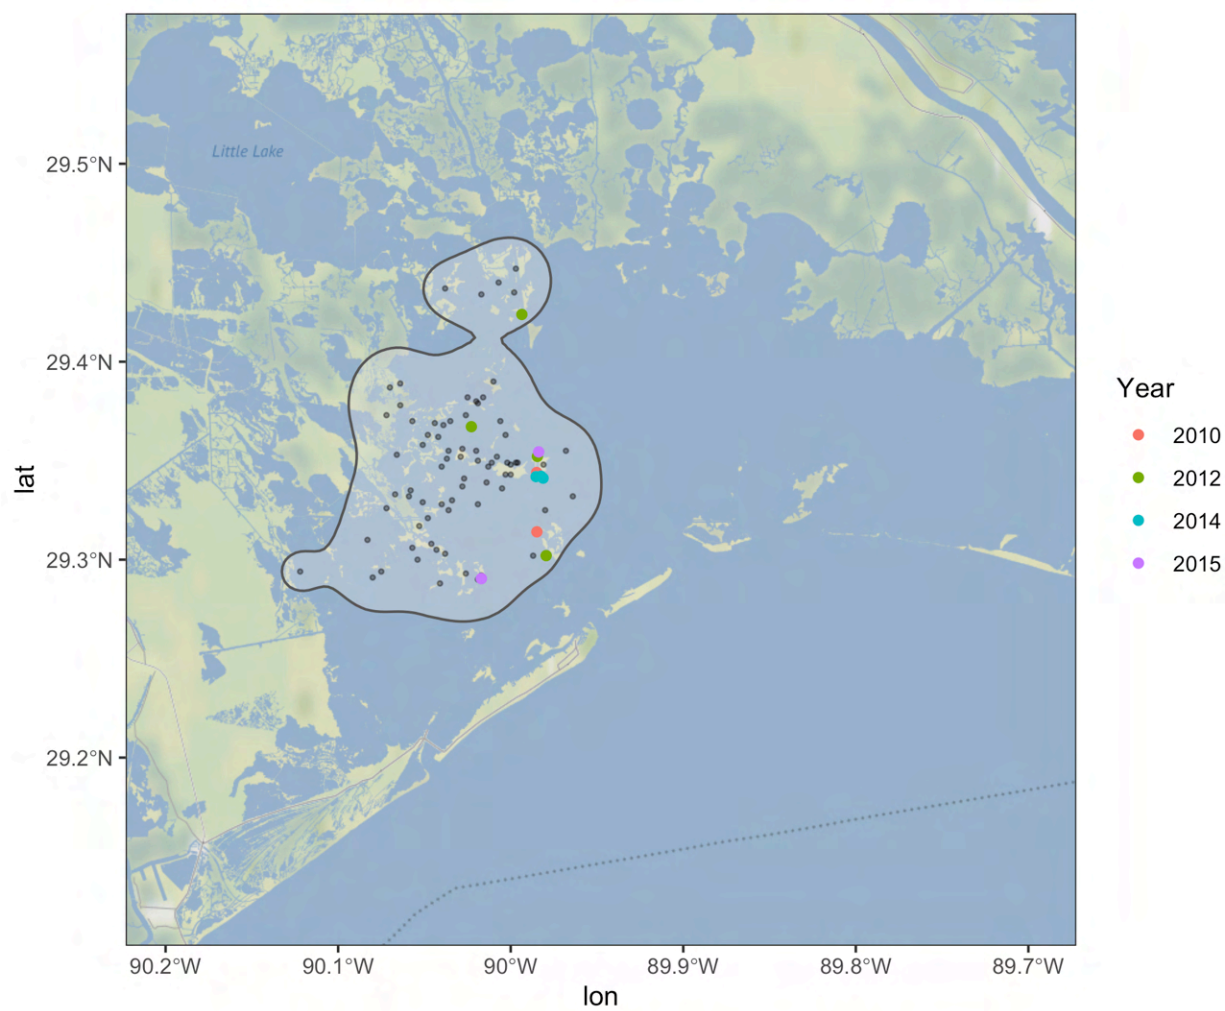

# Y98: Interior

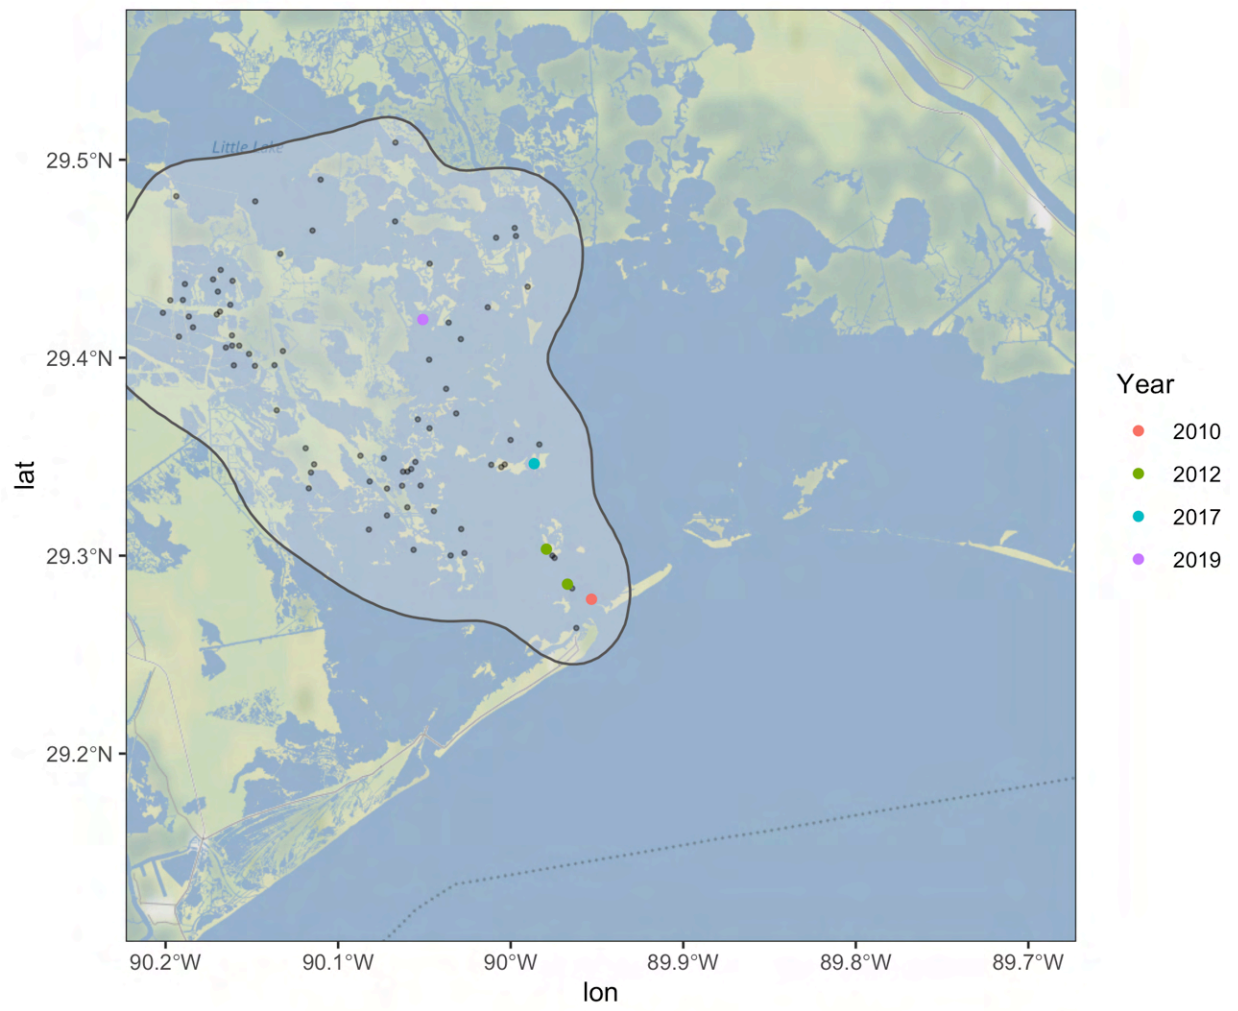

# Y99: Island

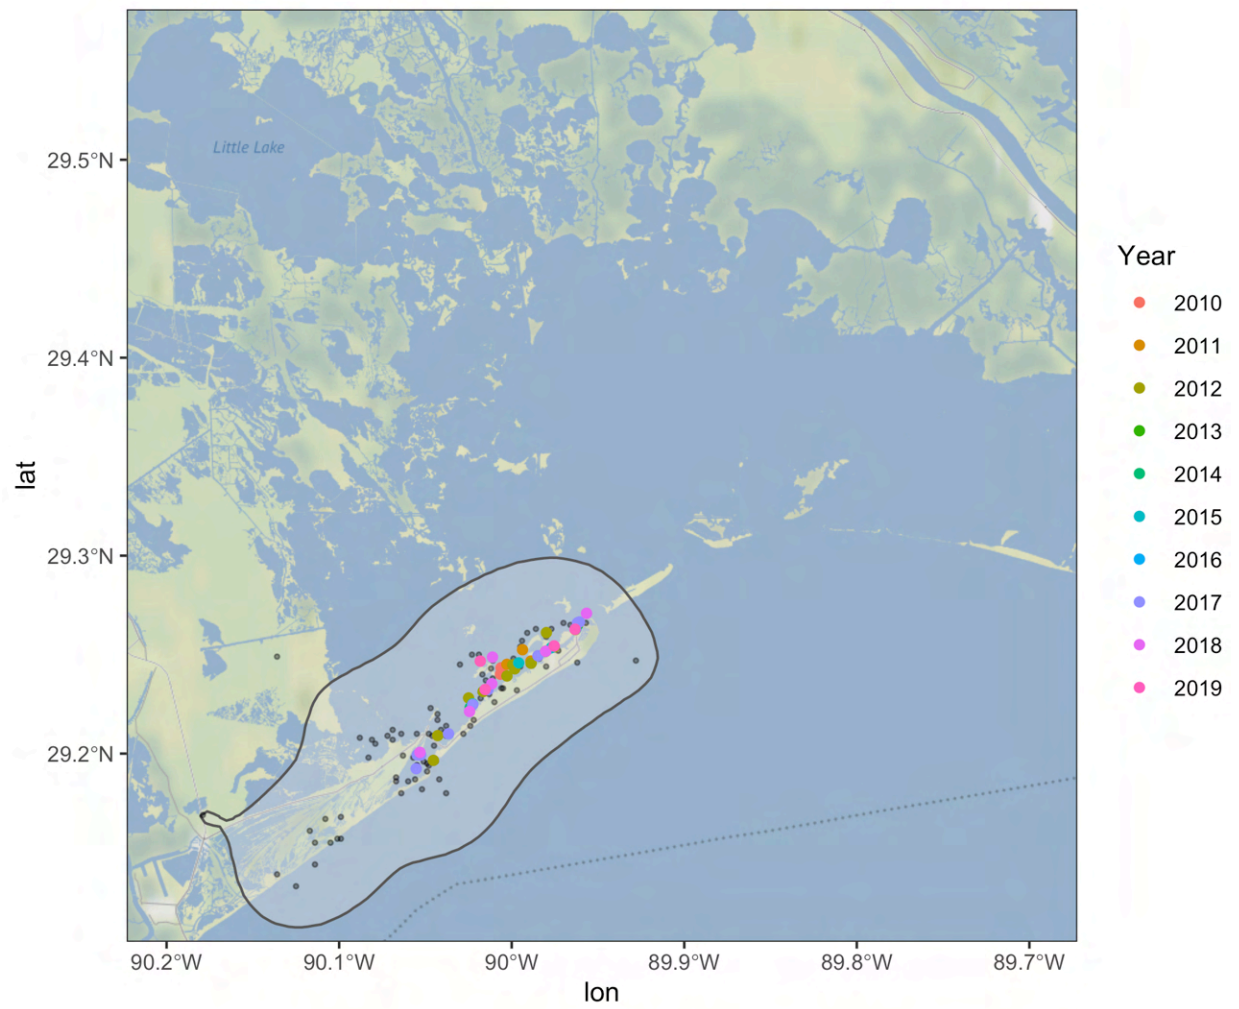



# YA1: Interior

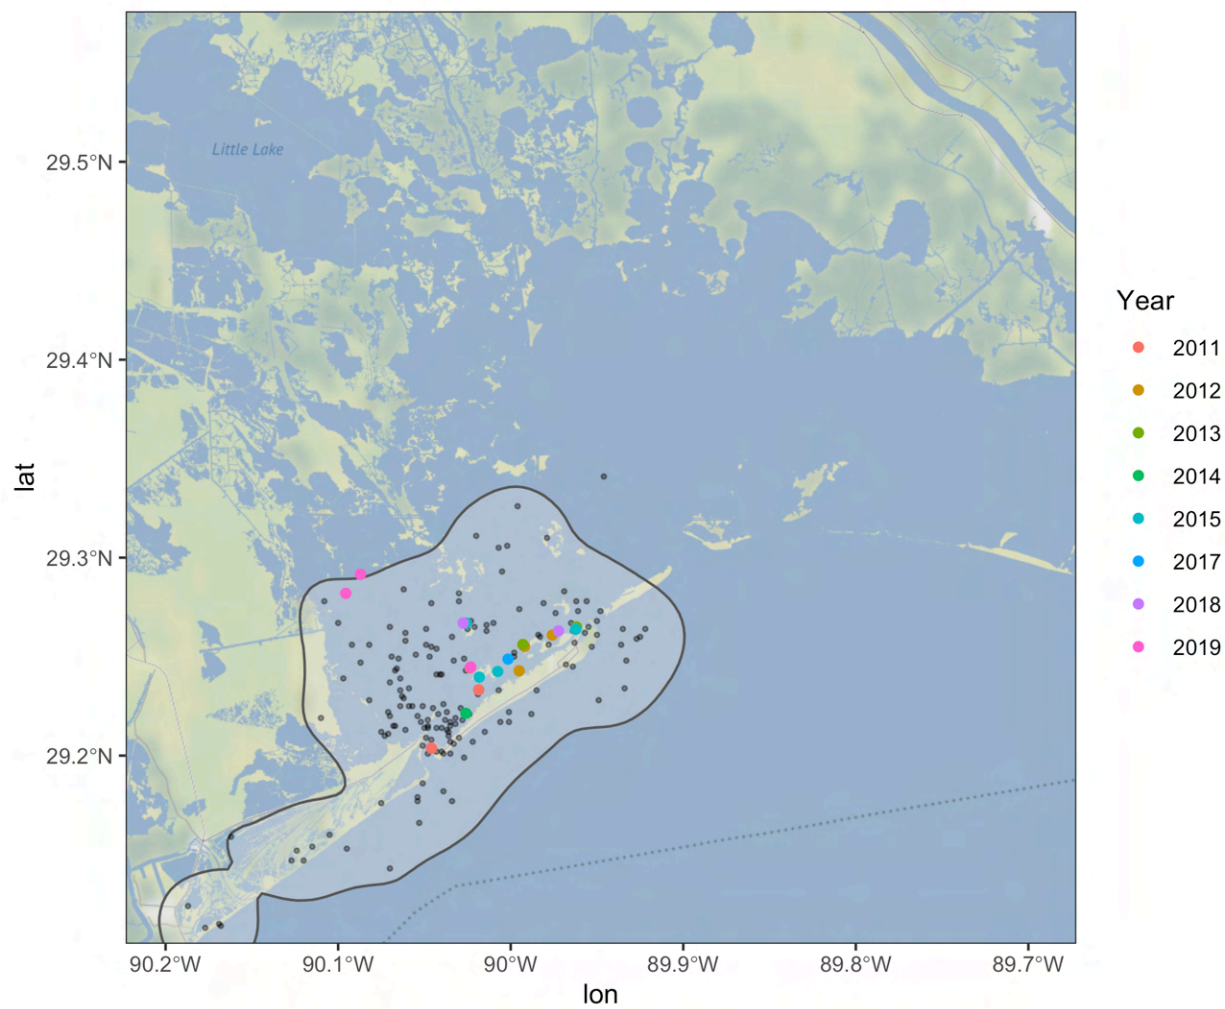

### YA3: Interior

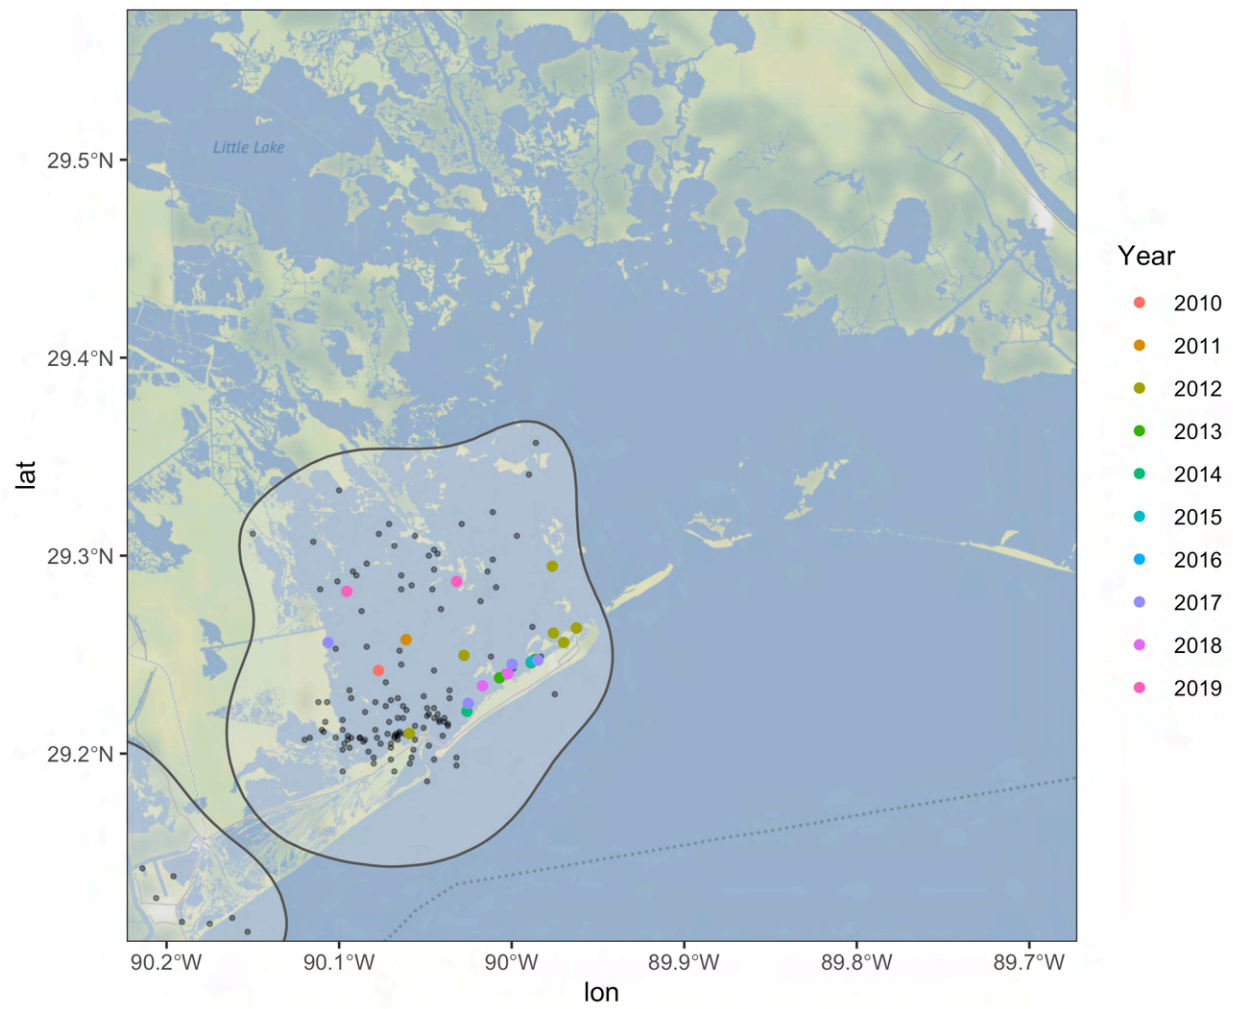

# YA5: Island

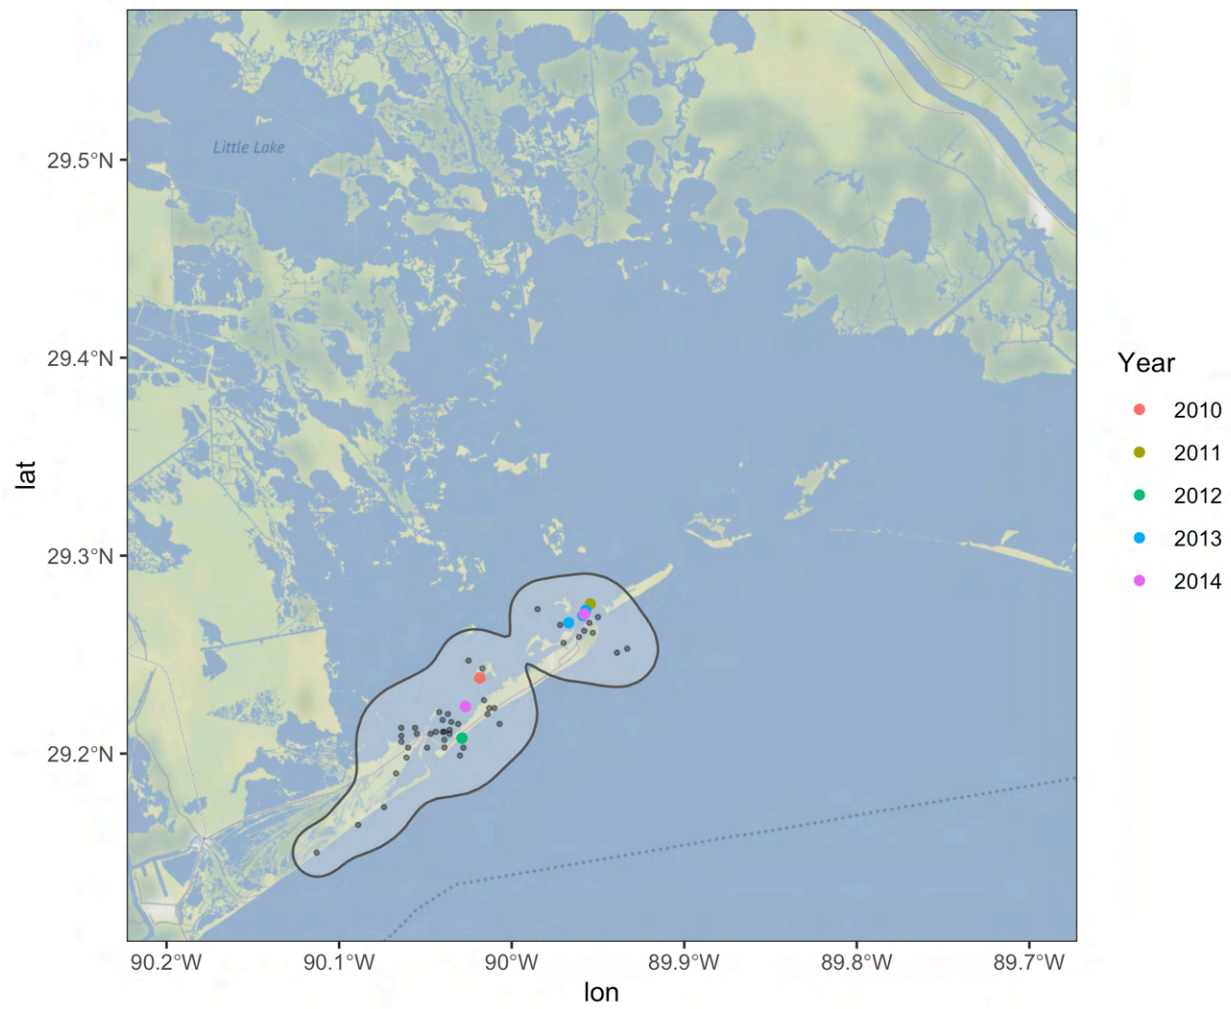

# YA7: Interior

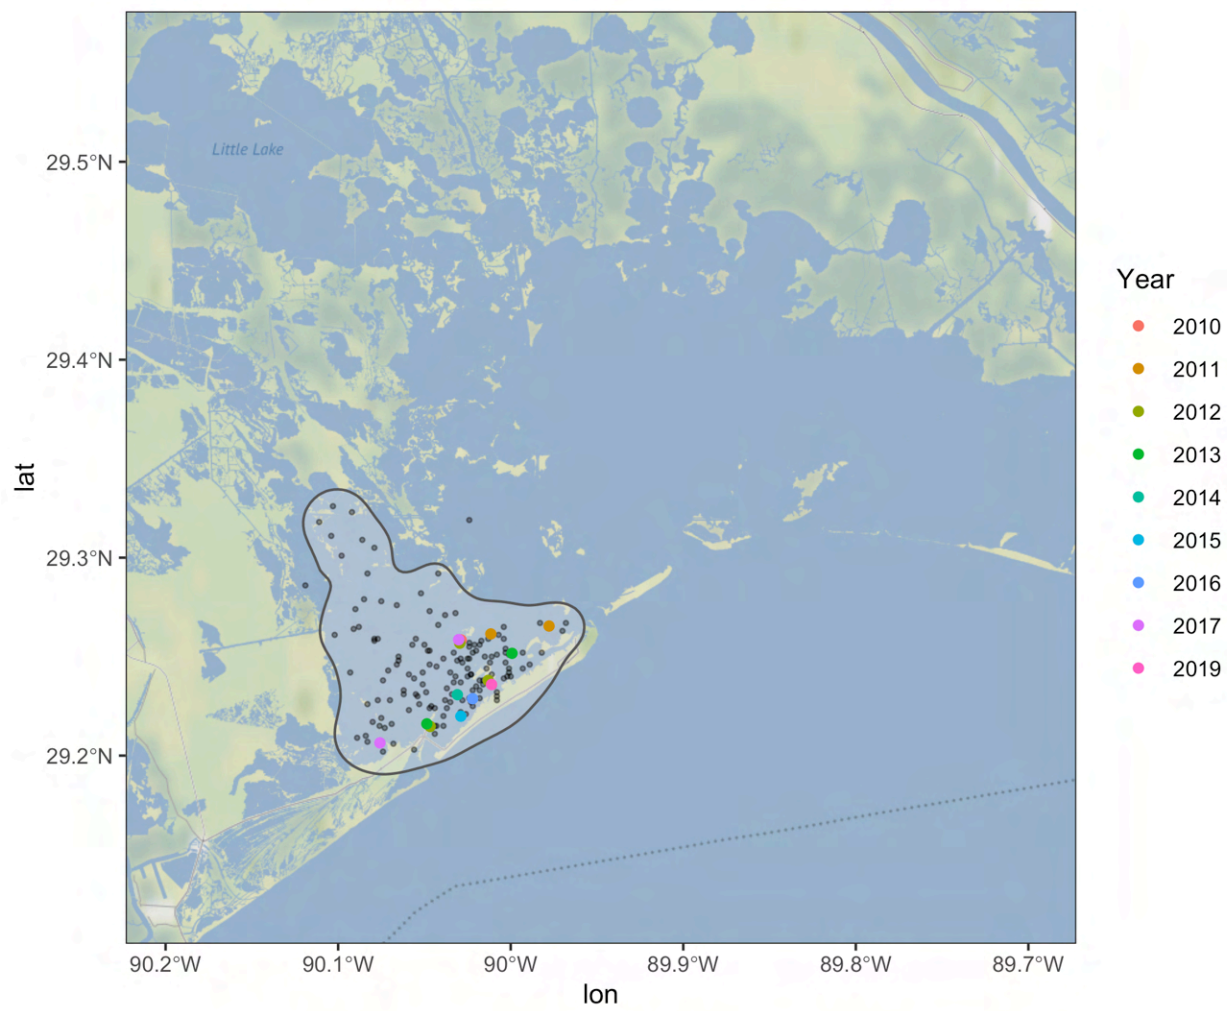

# YF0: Interior

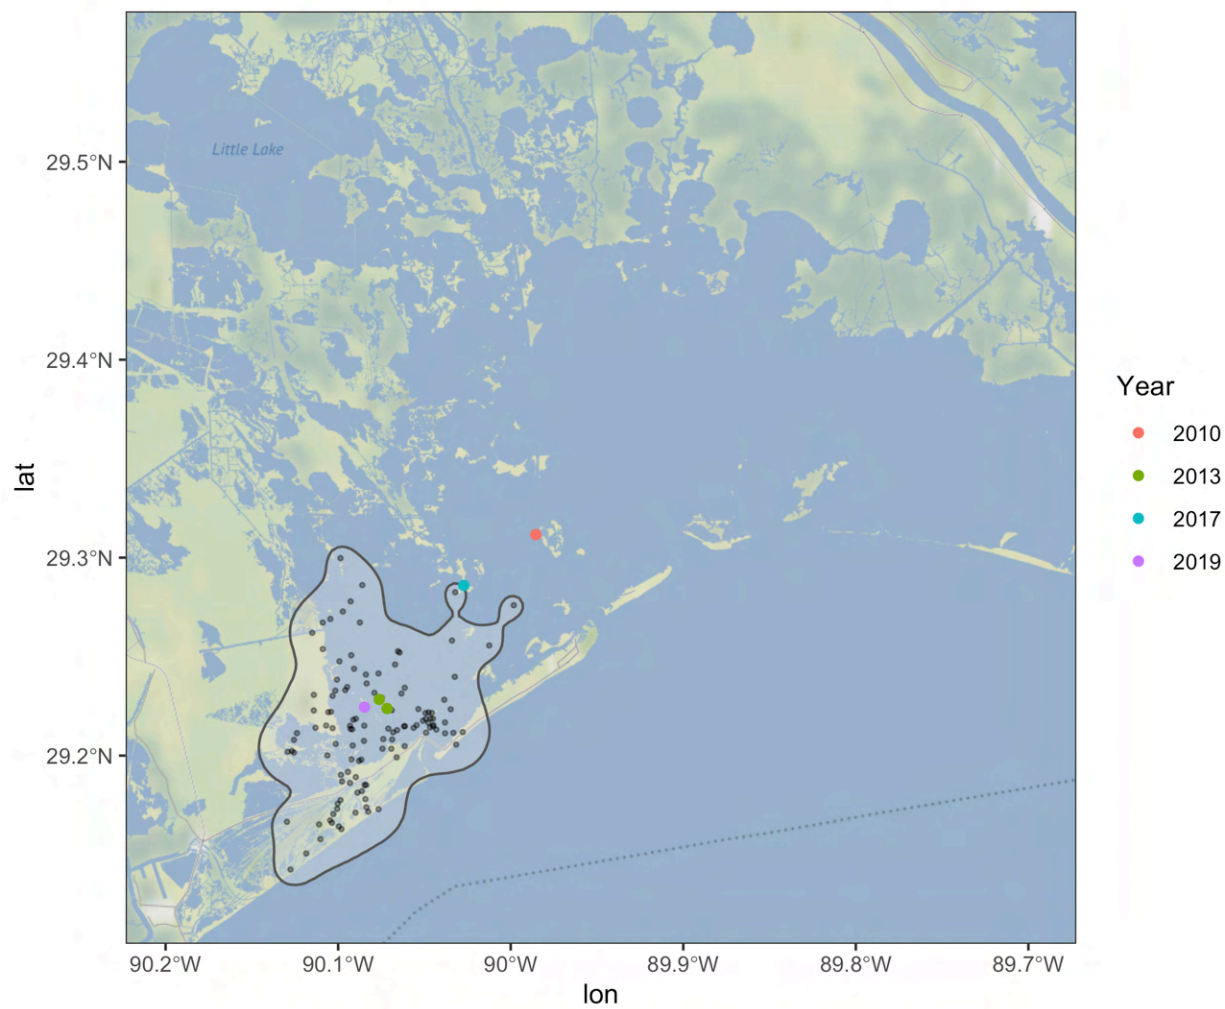



# YF1: Island

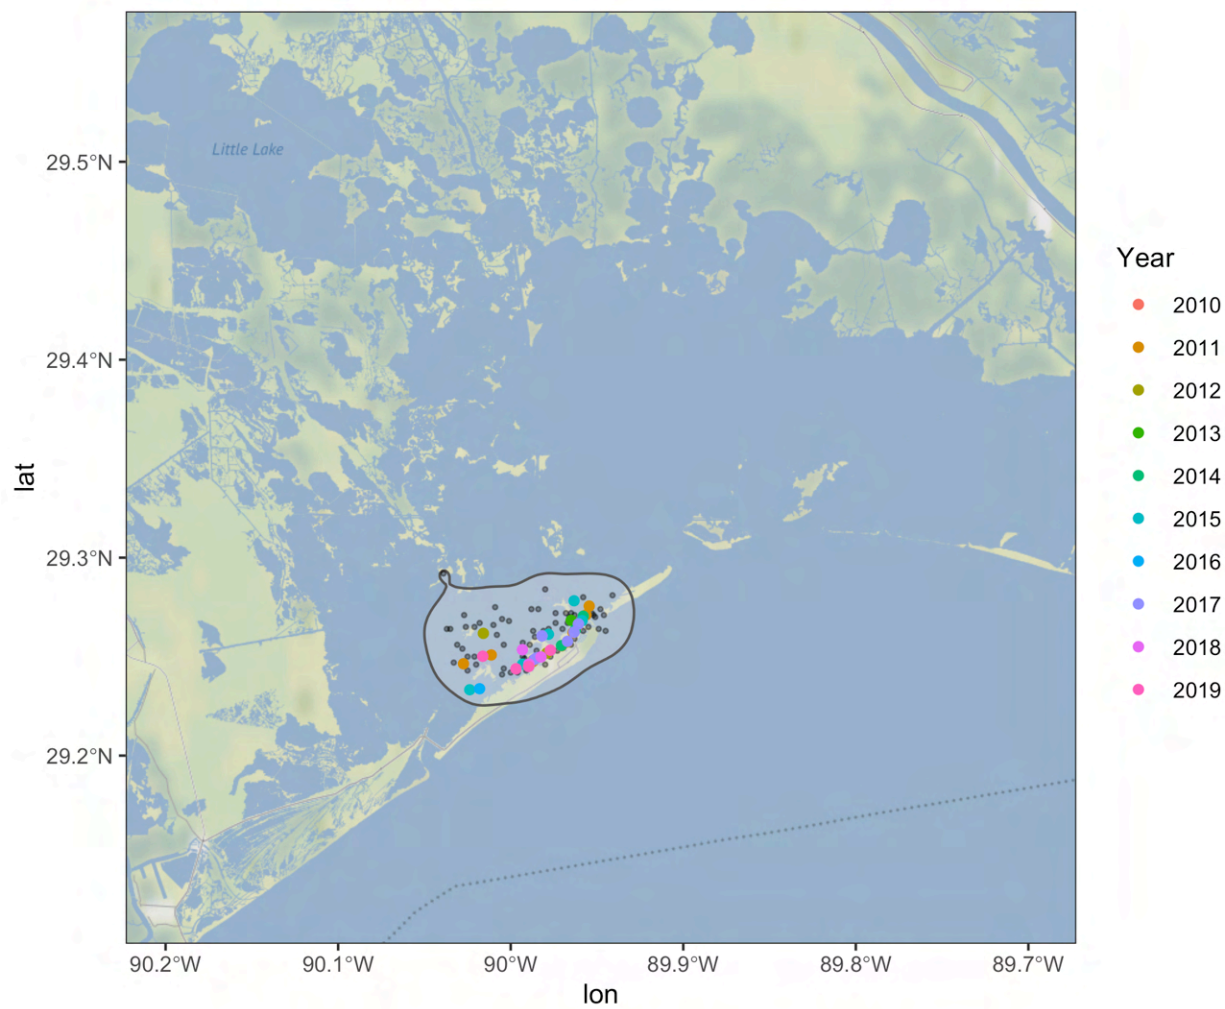

# YF2: Interior

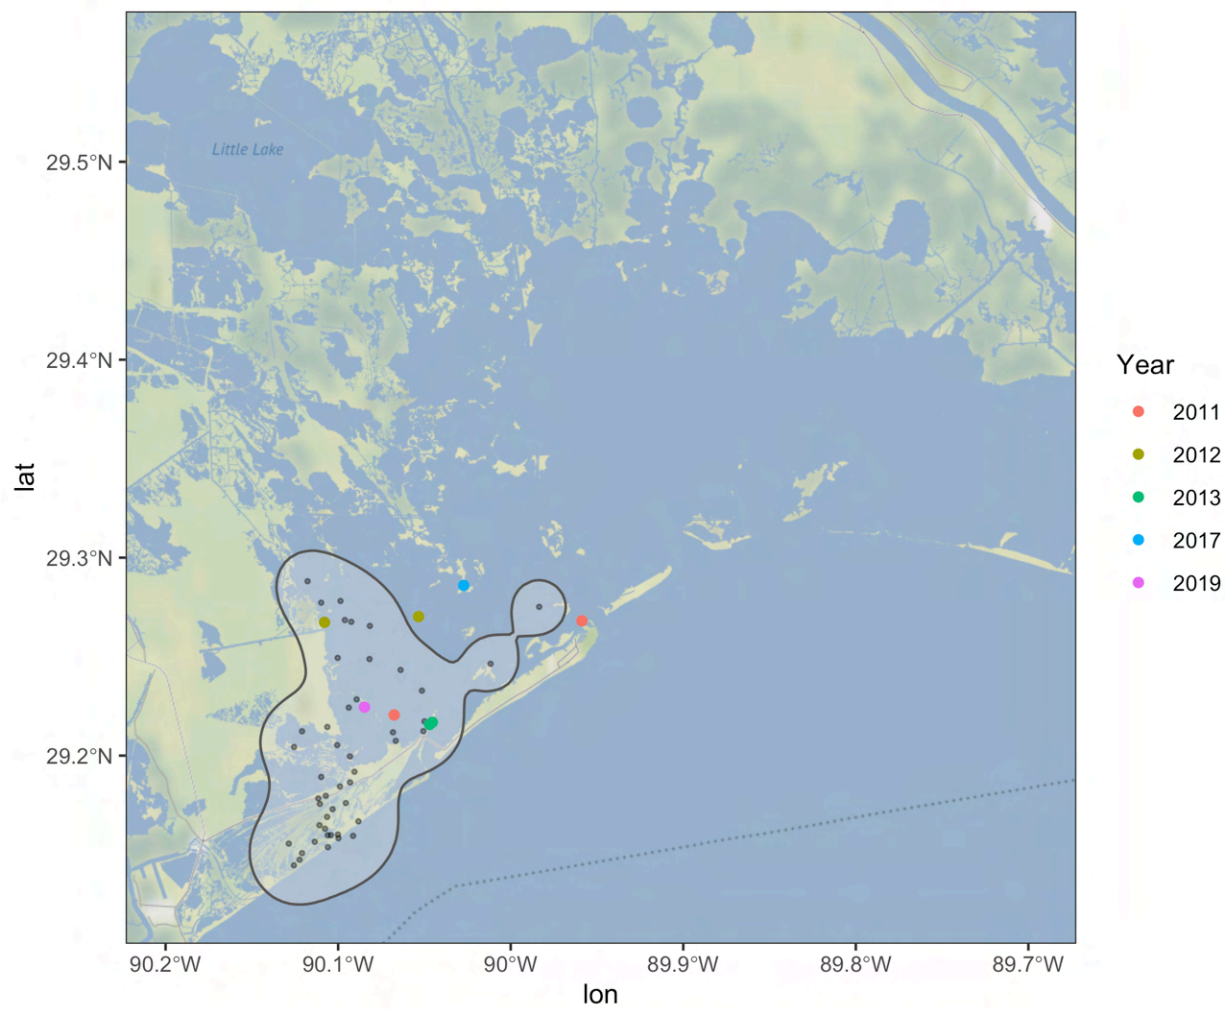

# YF4: Island

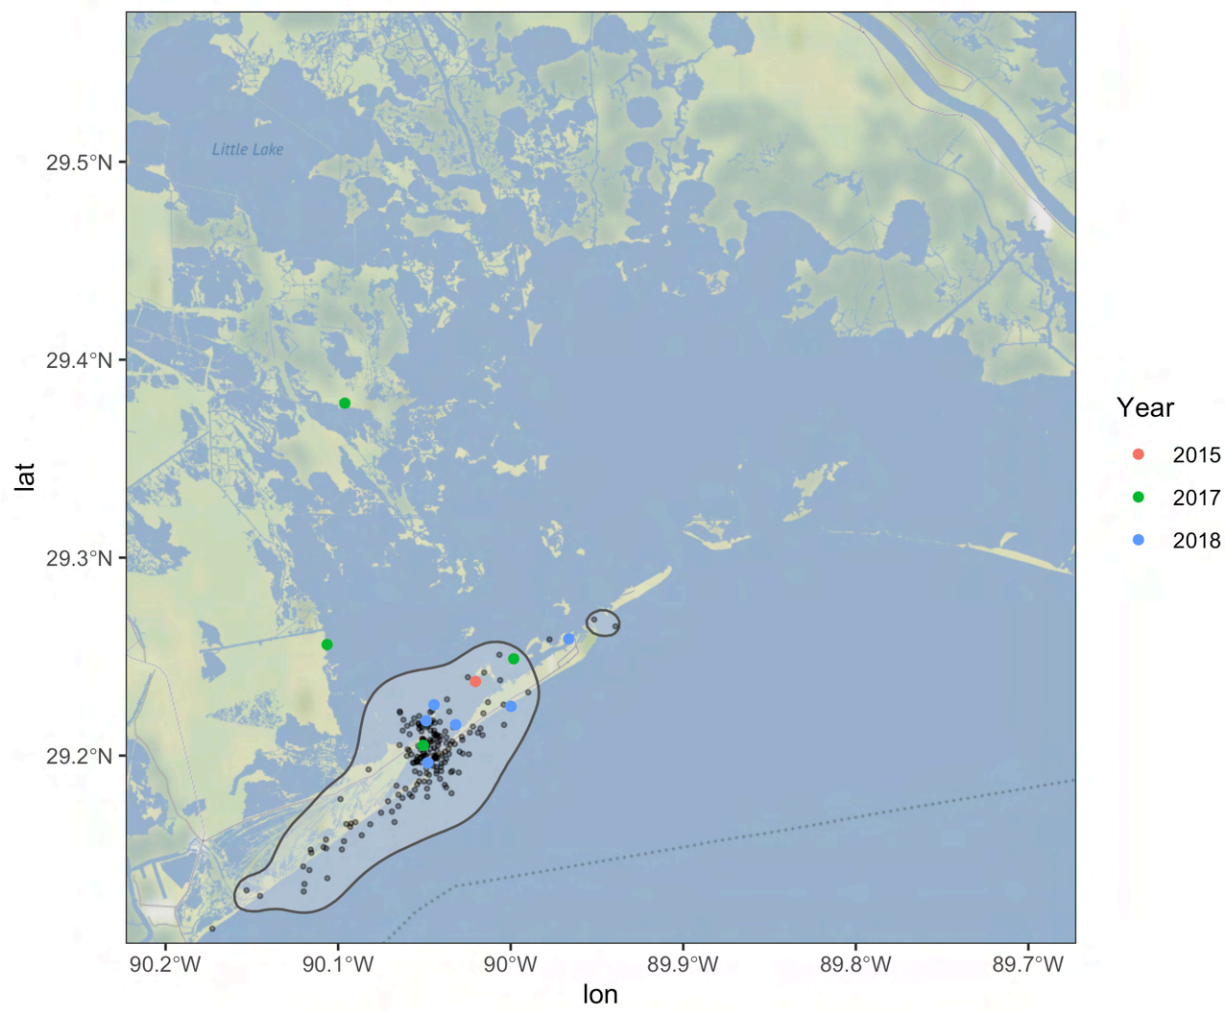

# YJ1: Island

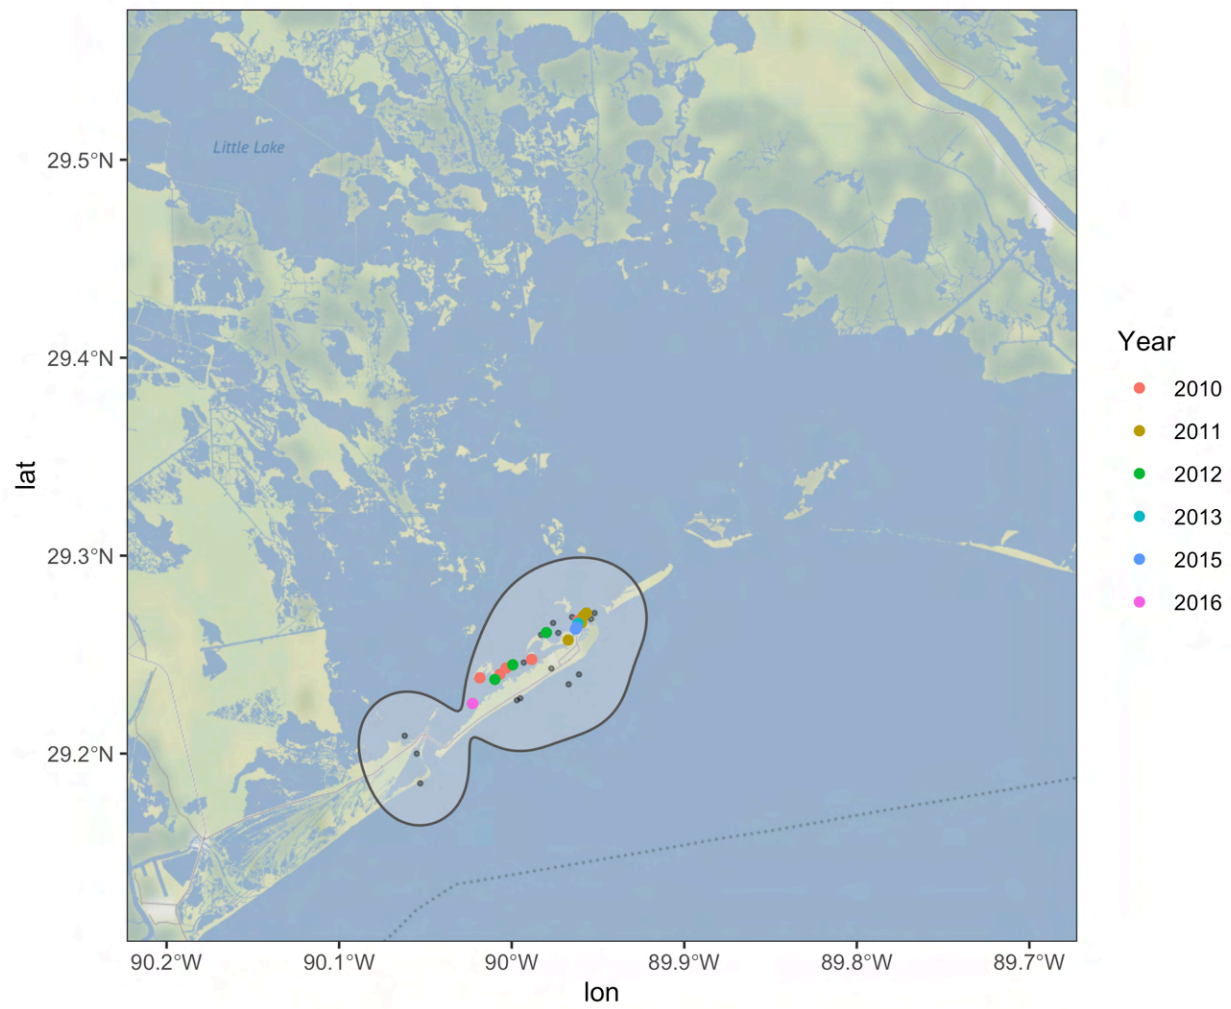

# YJ9: Island

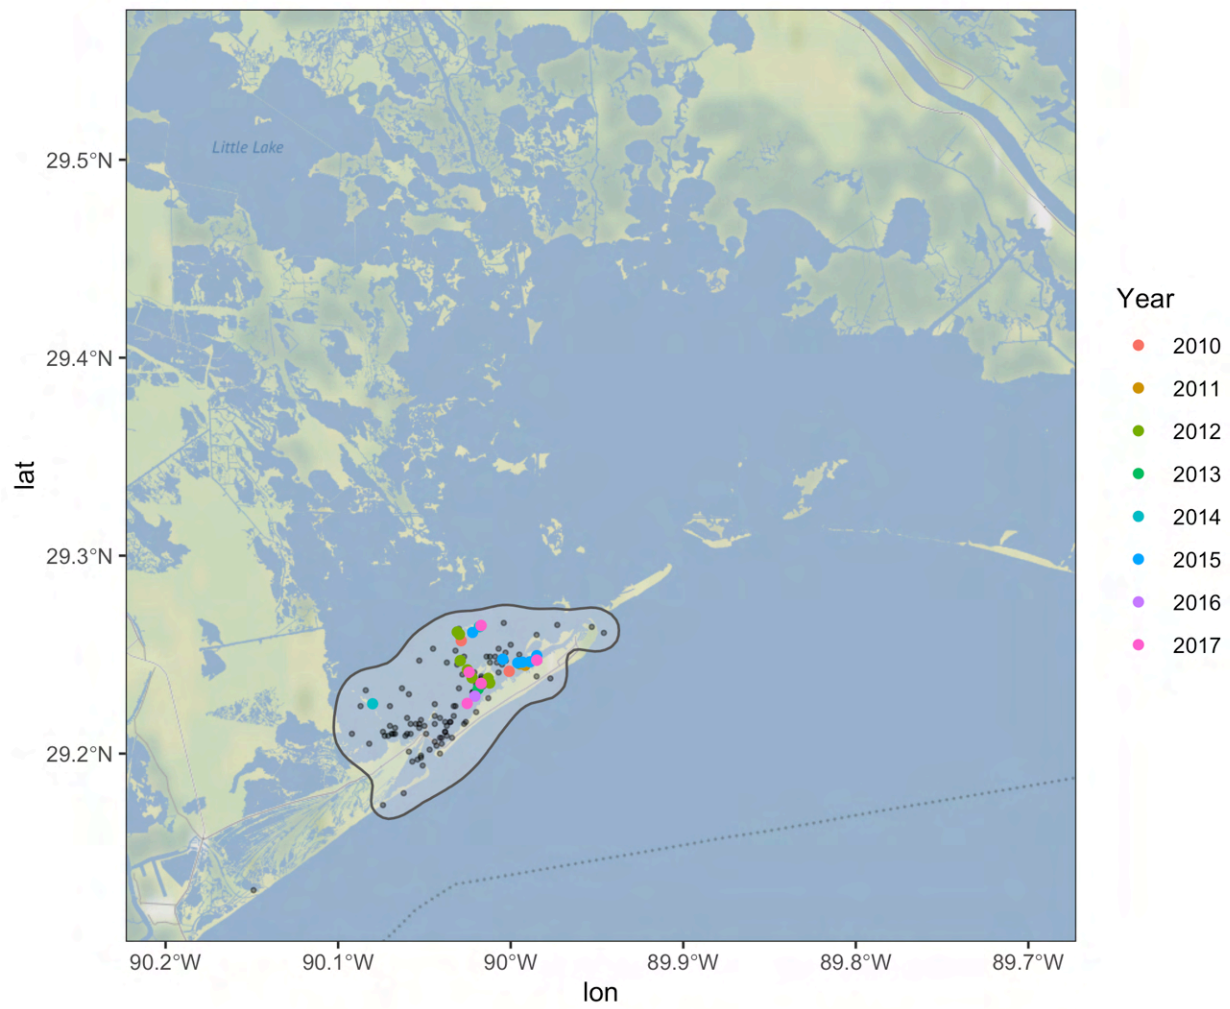



# YK1: Island

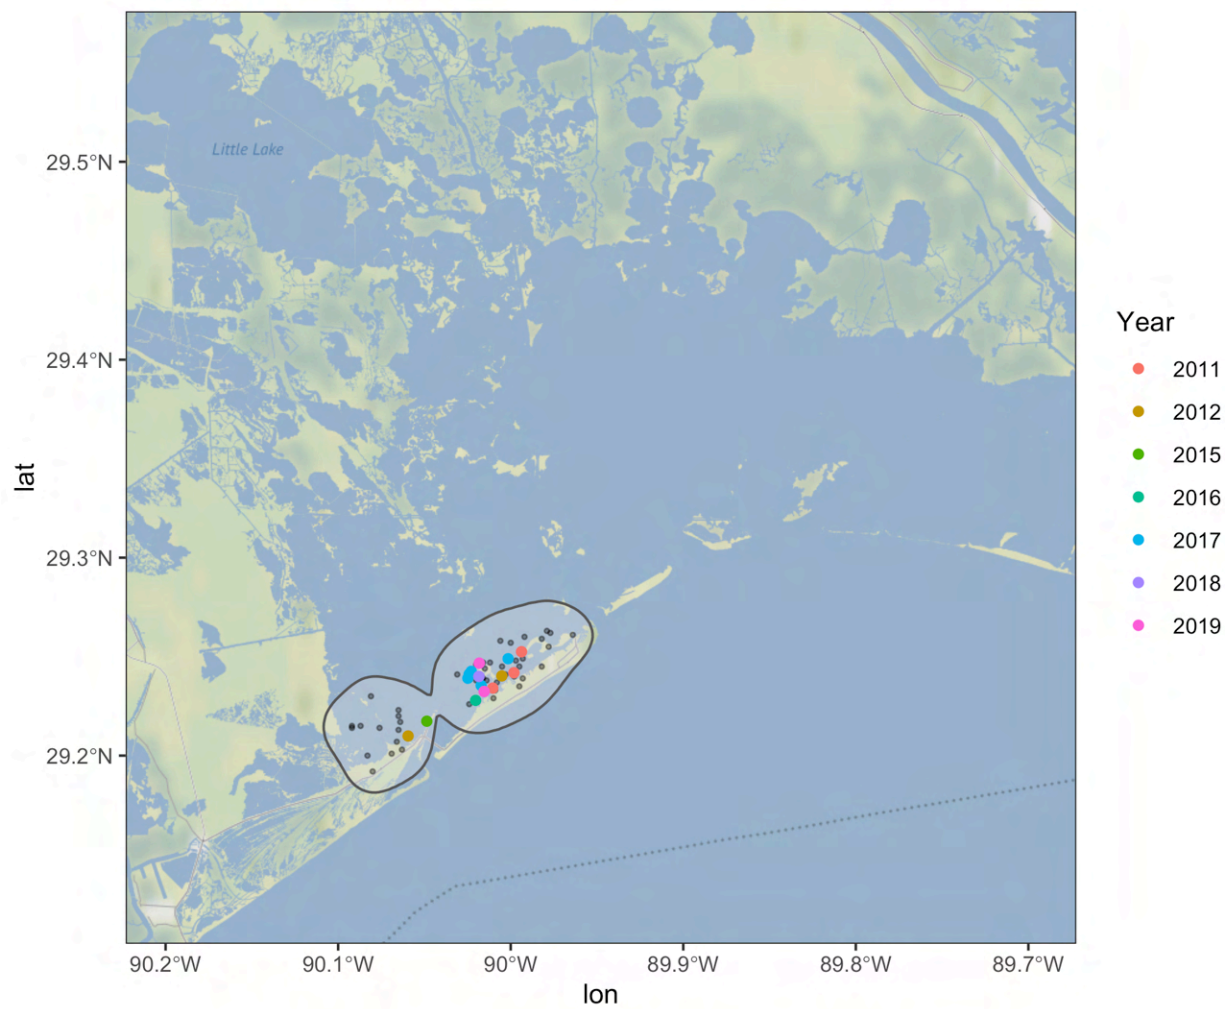

### YK3: Island

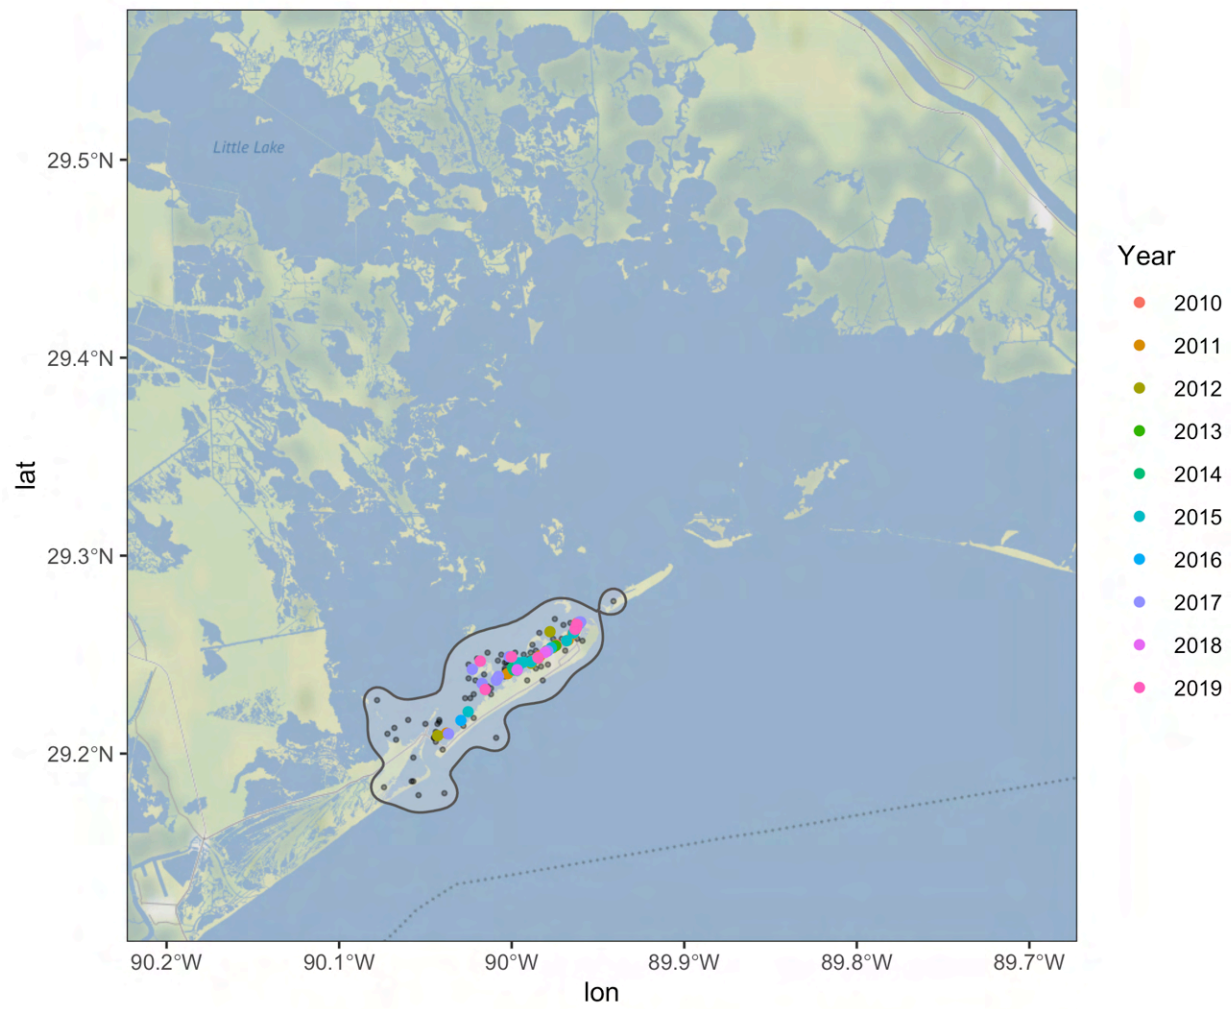

# YK5: Island

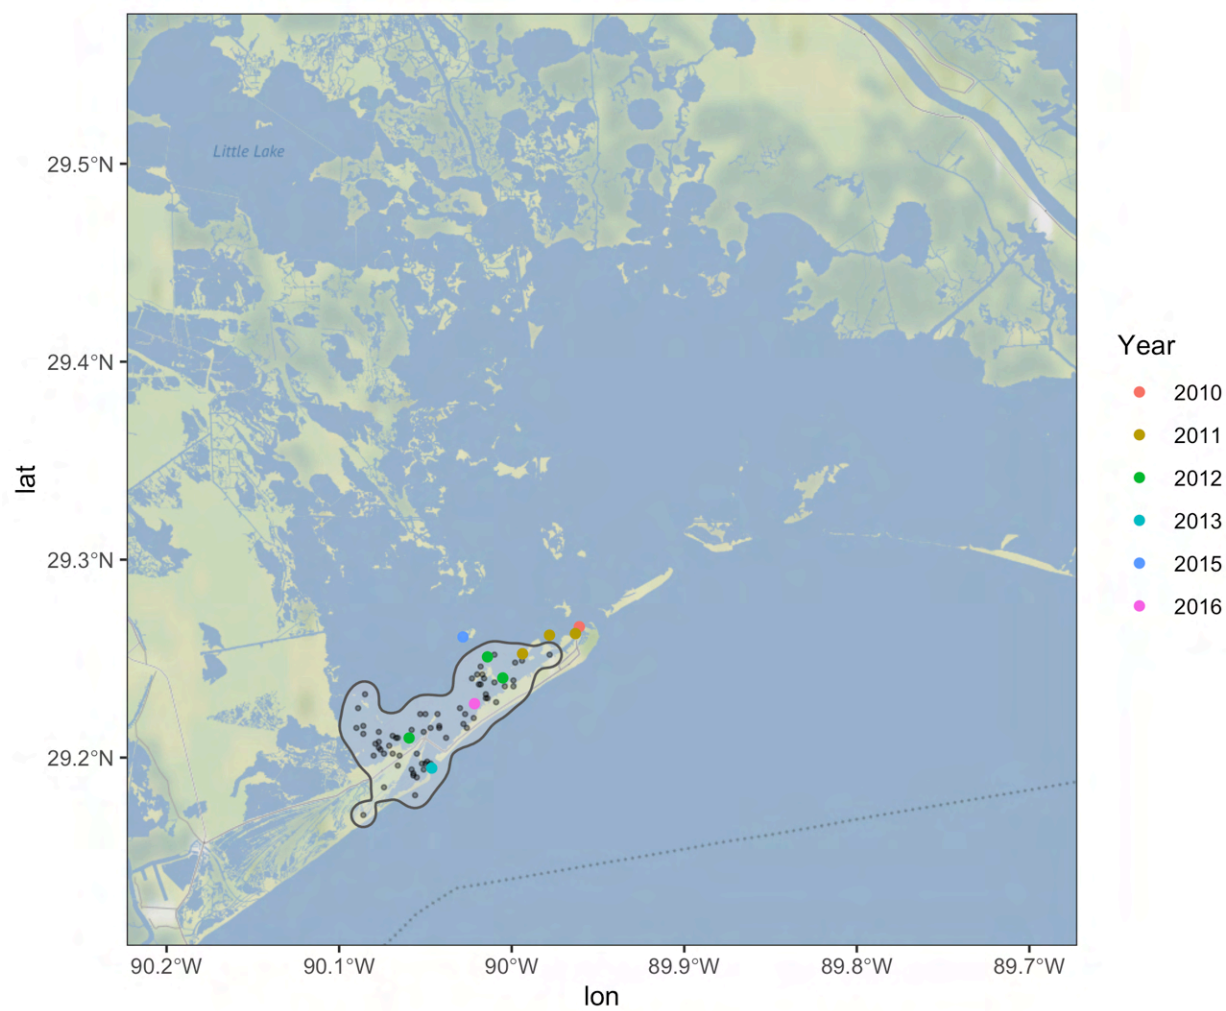

# YK9: Interior

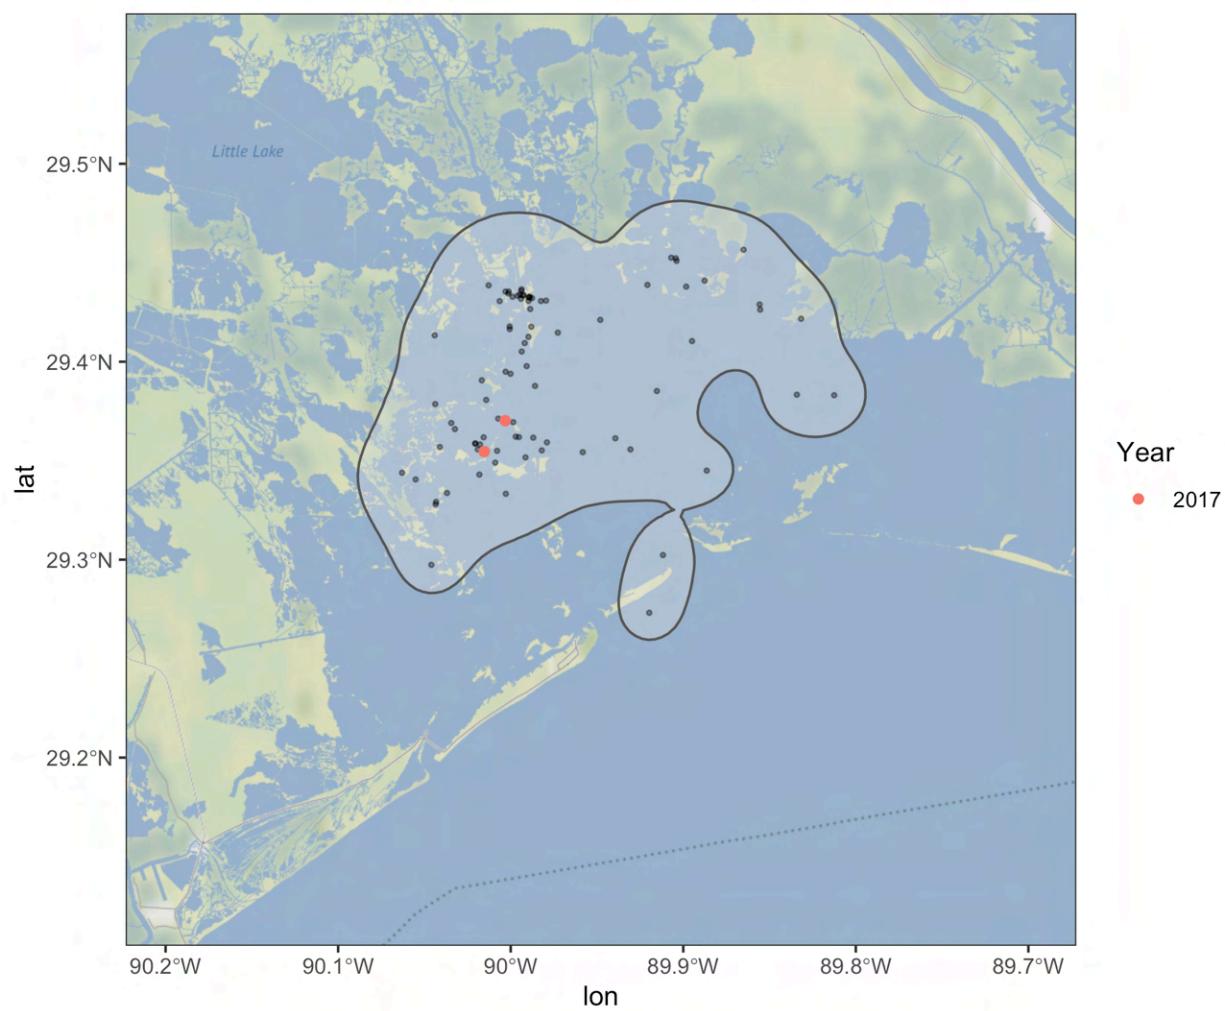

YN1: Interior

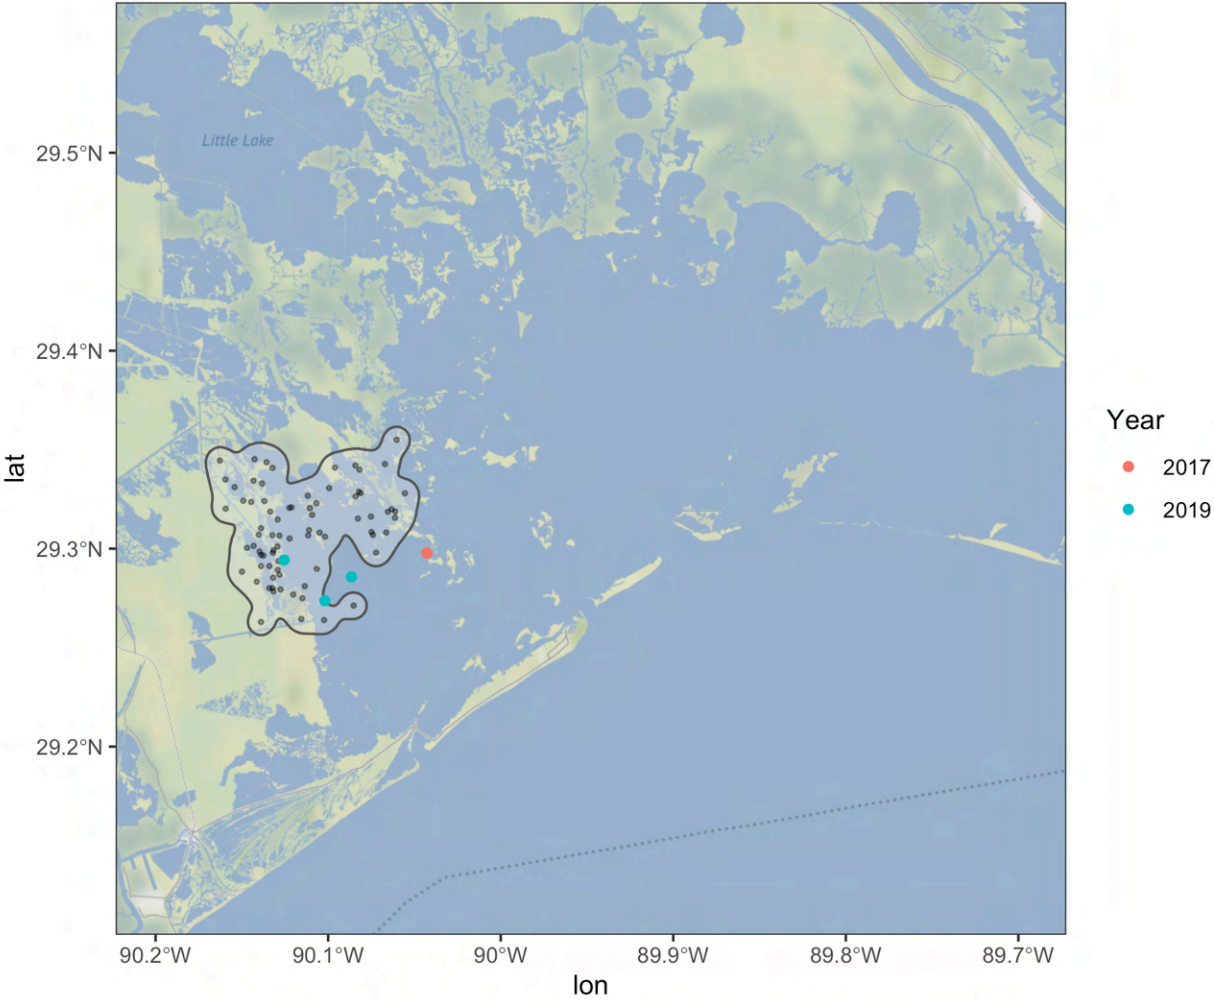



YN3: Interior

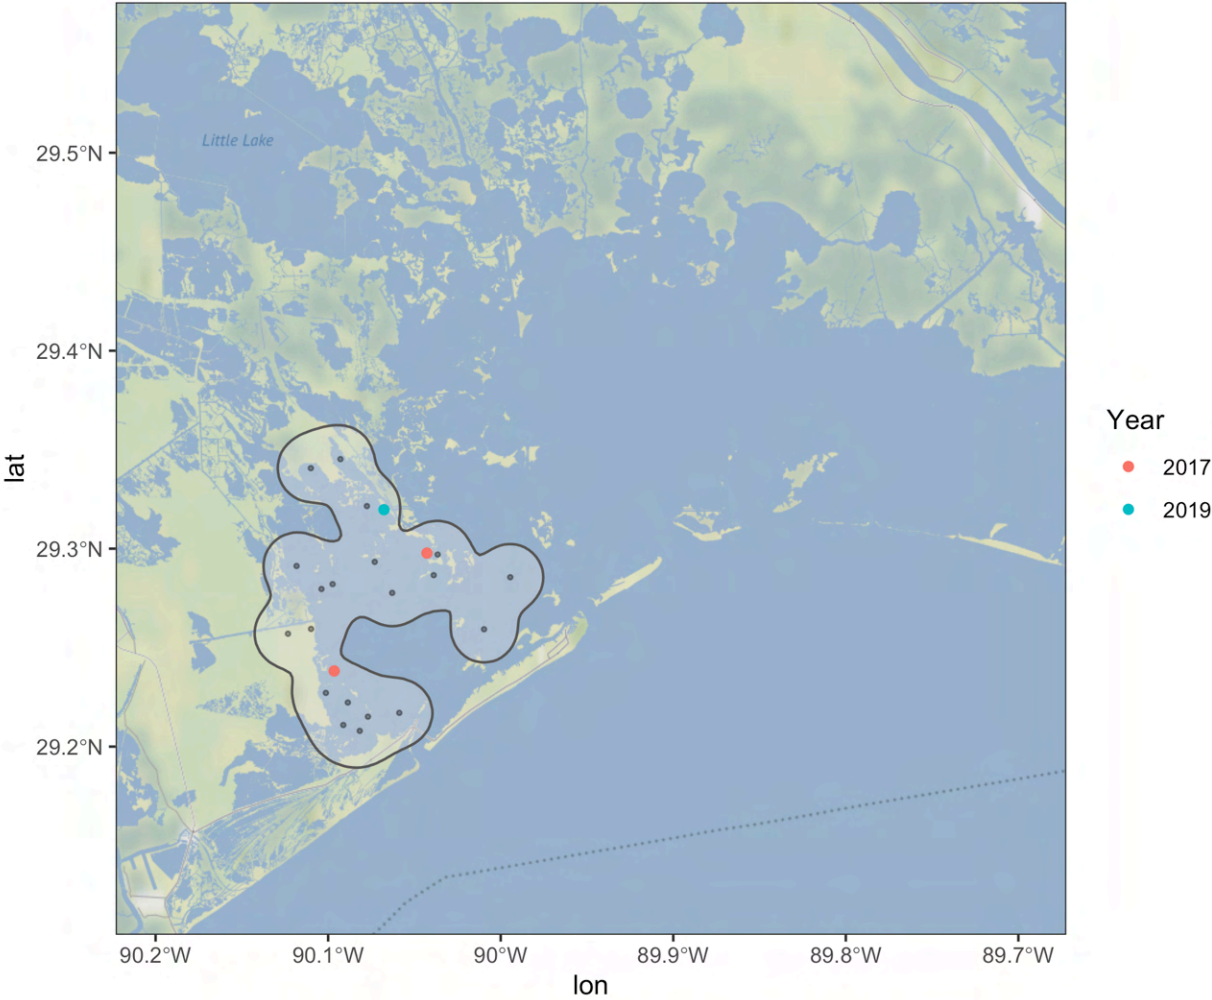

YN5: Interior

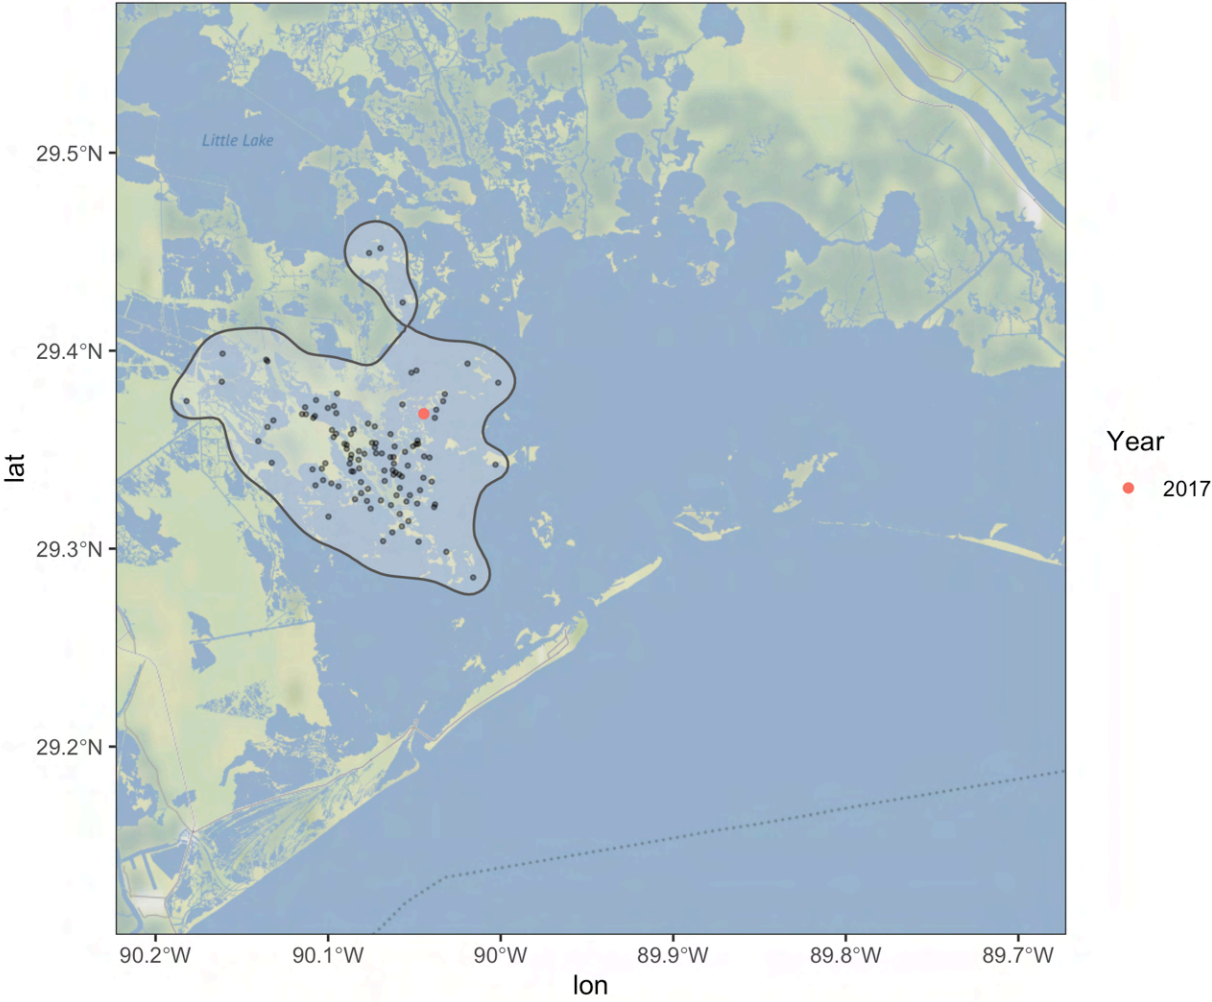

YN7: Interior

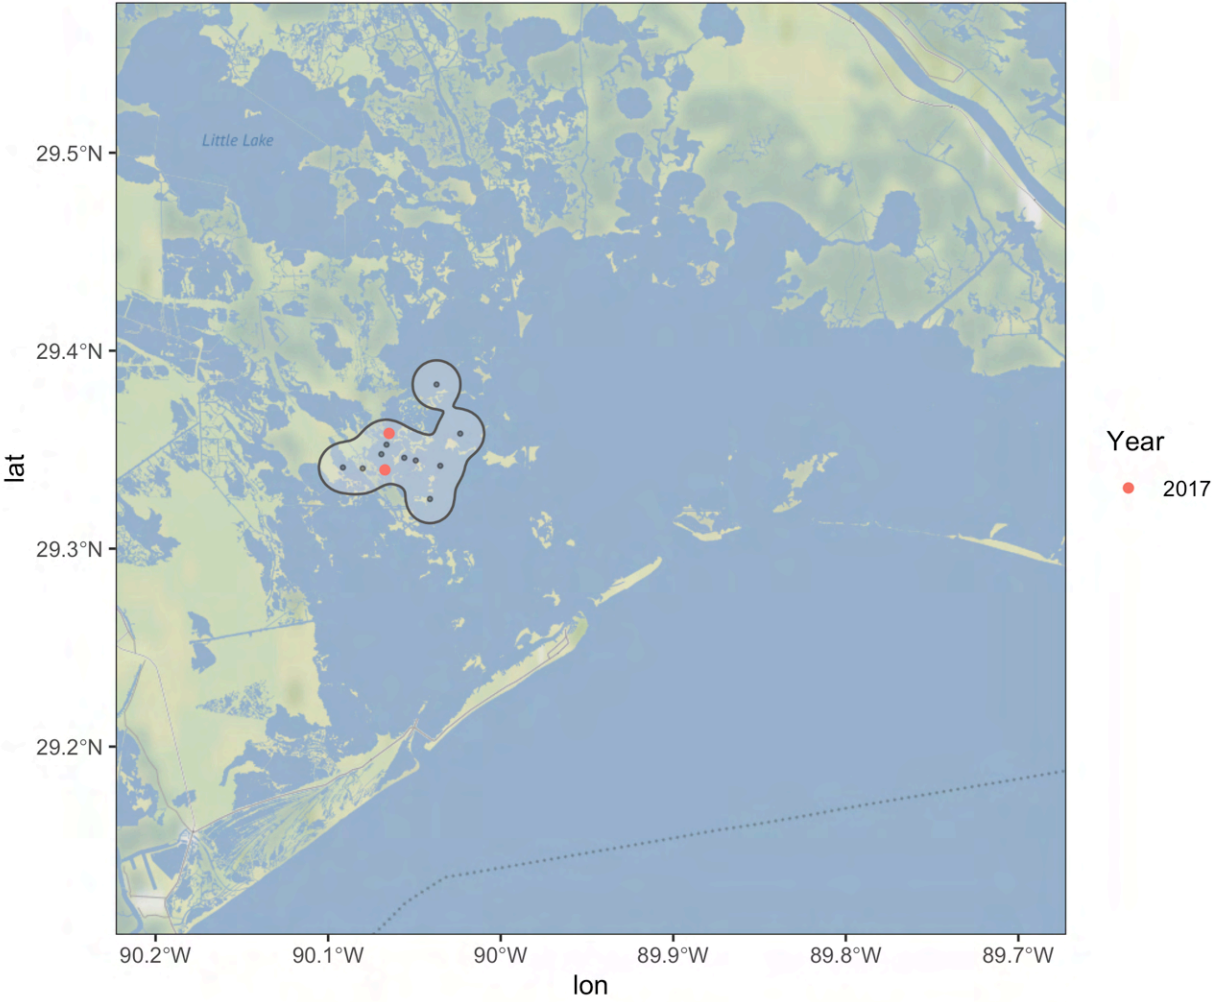

YN9: Interior

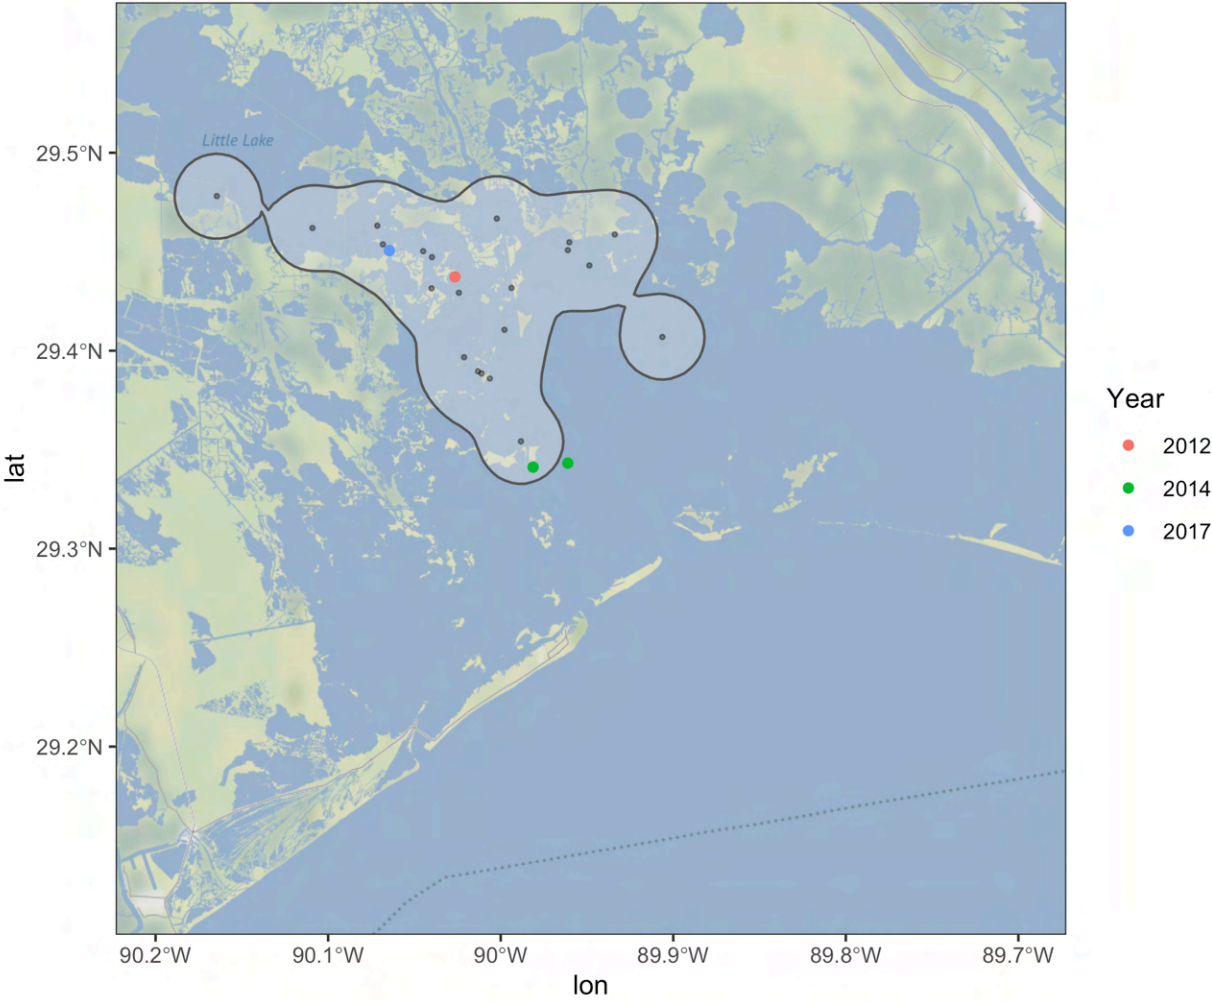

# YR1: Interior

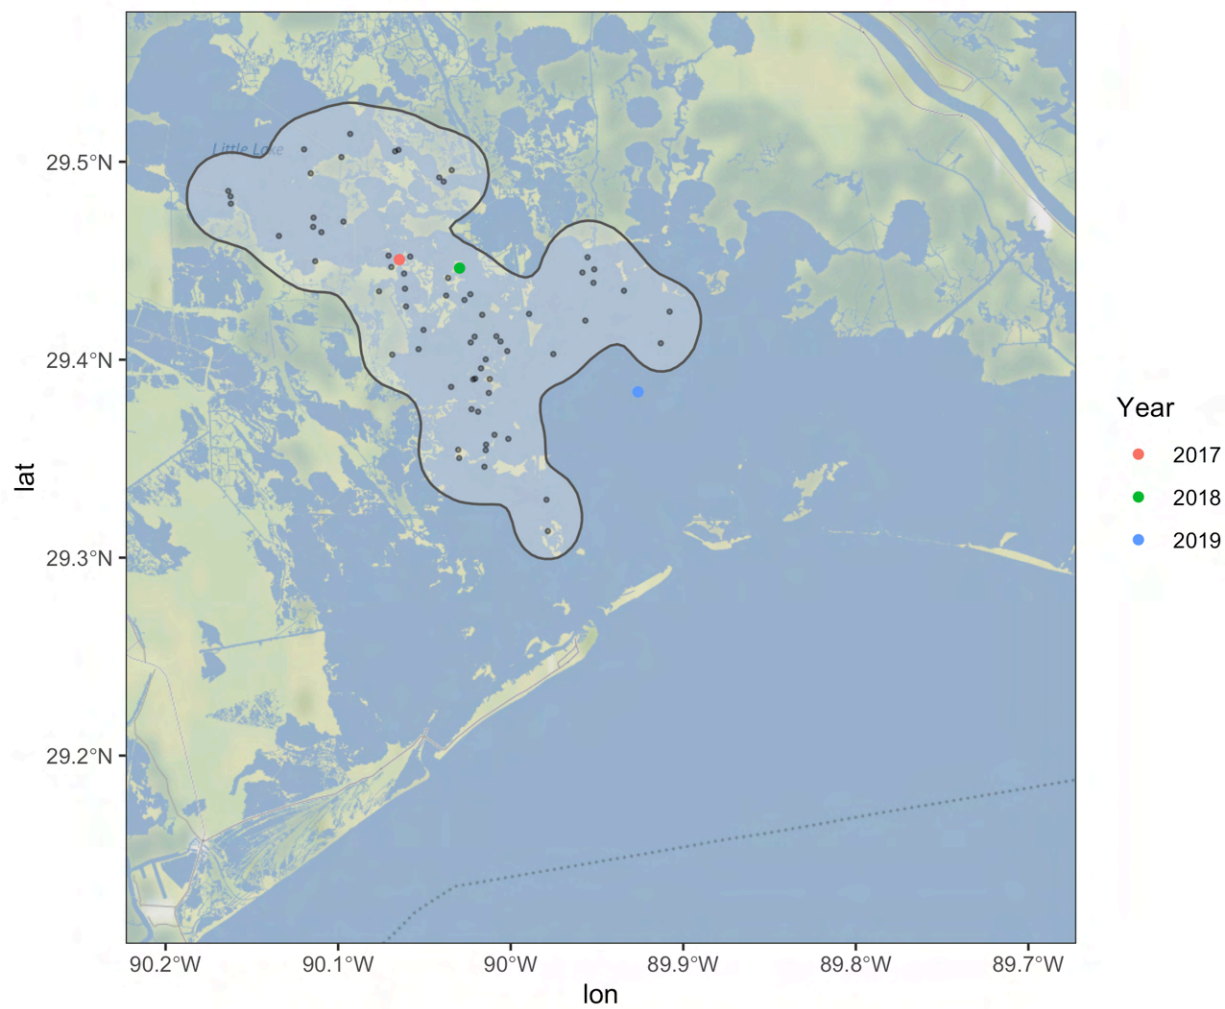



### YR3: Interior

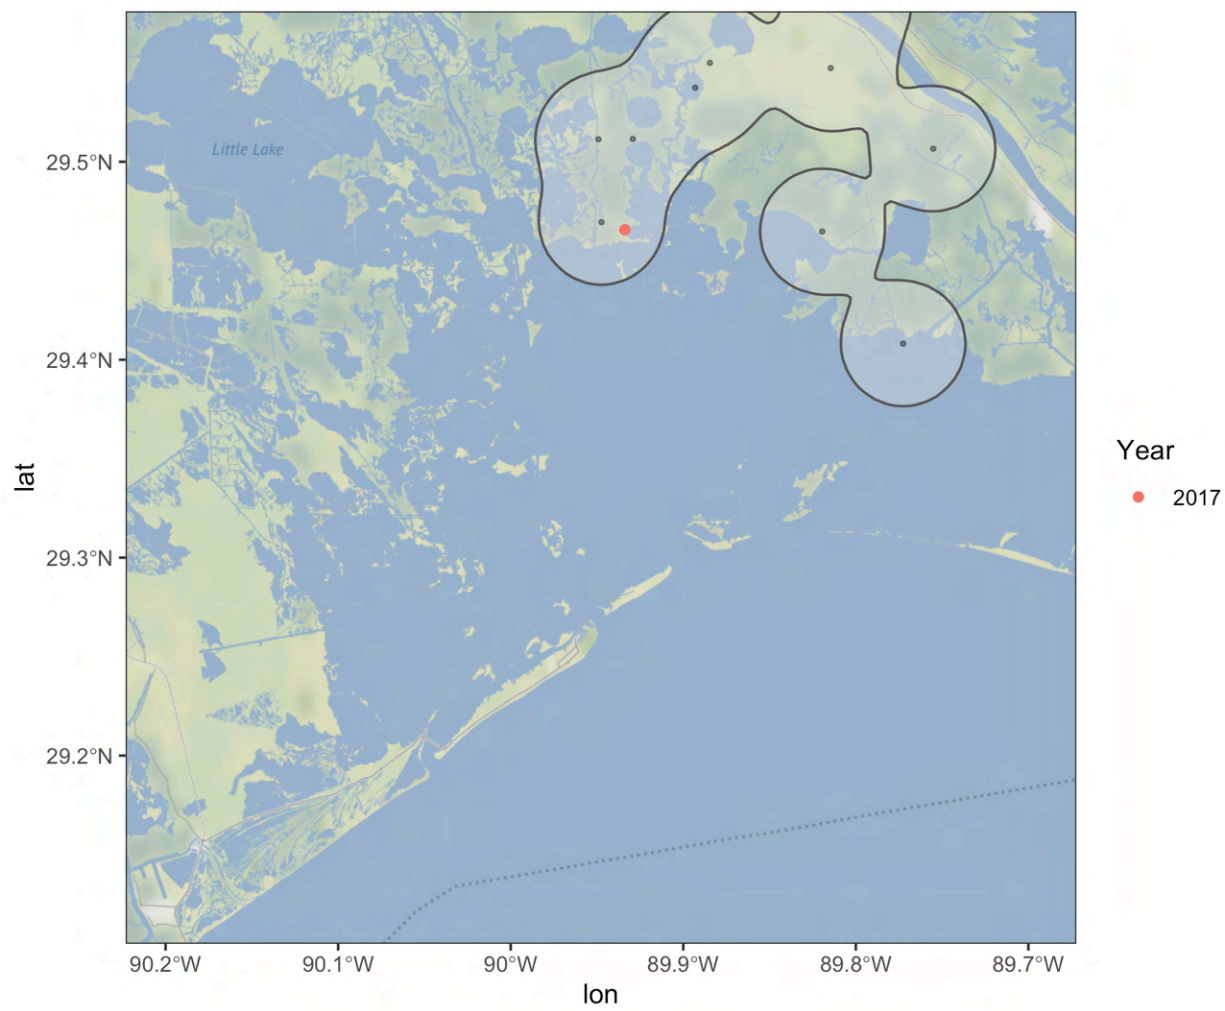

# YR5: Interior

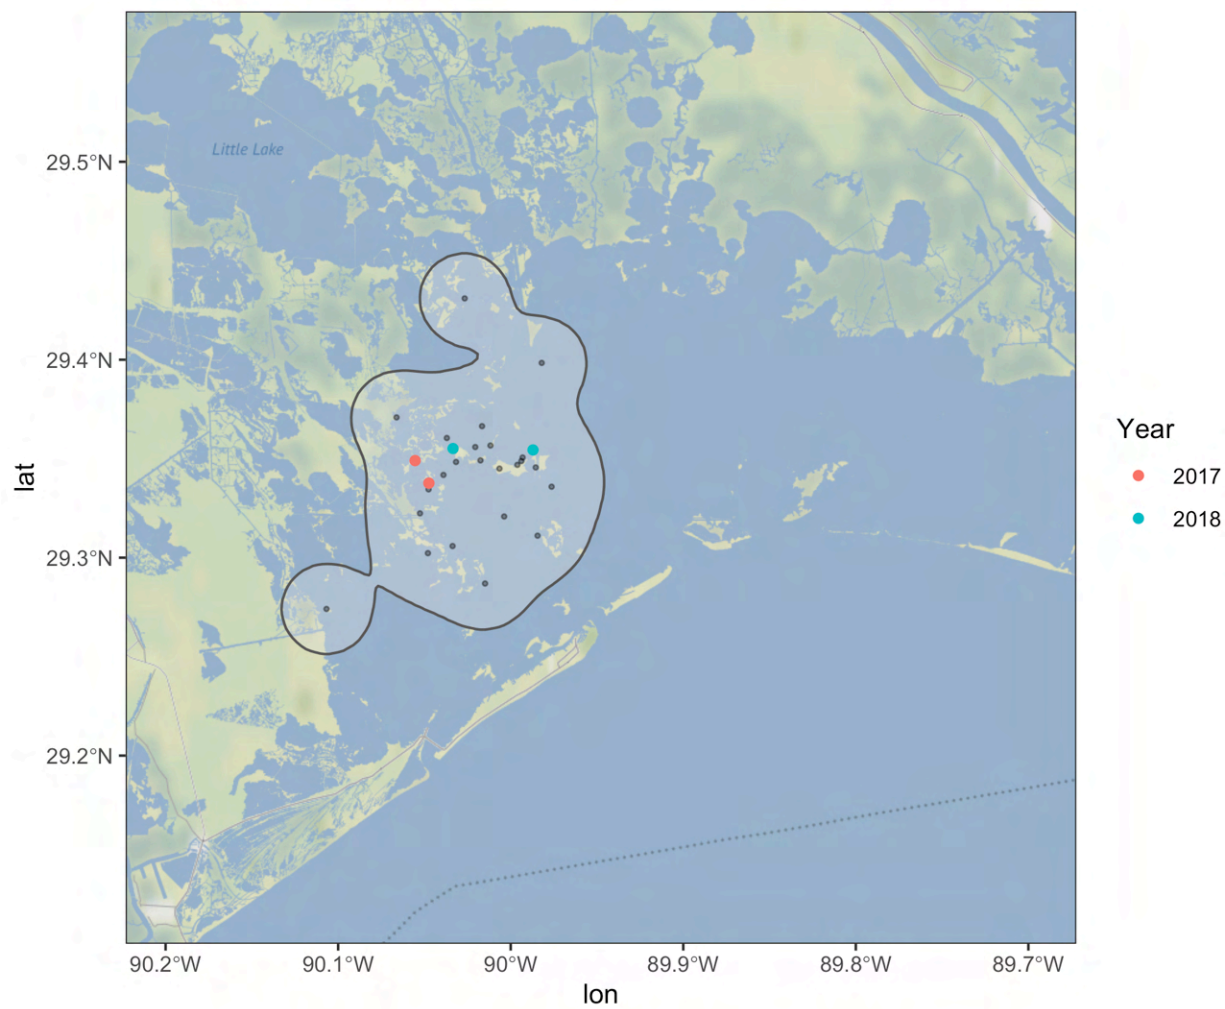

# YX5: Island

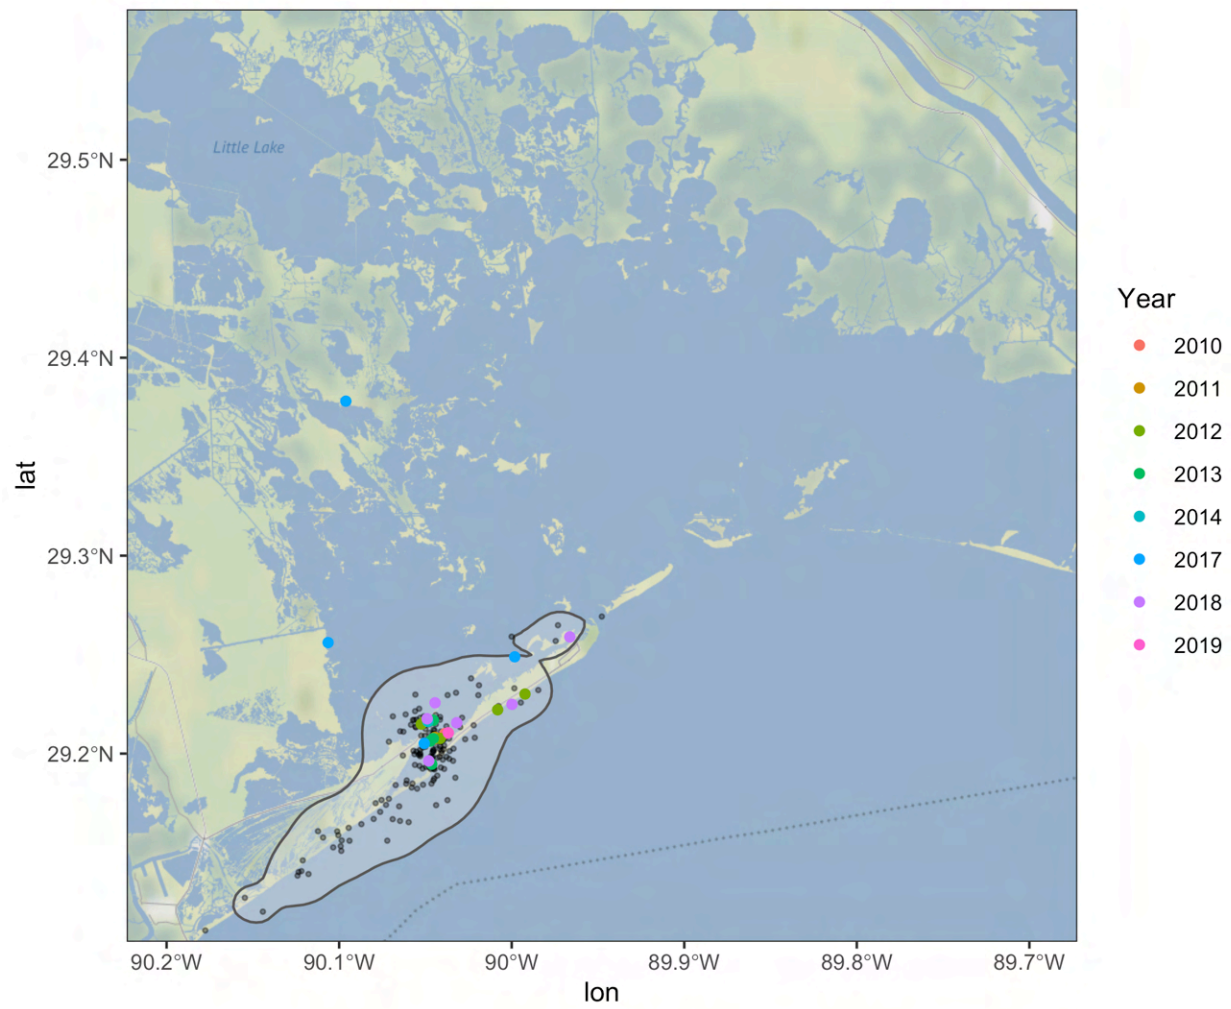

Supplement: S2 (10.1371/journal.pone.0258031.s002) [file journal.pone.0258031.s002]
